# Supplementary material for: Copolymerisation of ethylene with polar monomers by using palladium catalysts bearing an N-heterocyclic carbene–phosphine oxide bidentate ligand
Source: Royal Society of Chemistry journal article supplement (doi:10.1039/c7cc00002b), 2017-01-01
Supplement: c7cc00002b1.pdf [file c7cc00002b1.pdf]

Supplementary Information For:

**Copolymerisation of Ethylene with Polar  
Monomers by Palladium Catalysts Bearing an  
N-Heterocyclic Carbene–Phosphine Oxide  
Bidentate Ligand**

W. Tao,<sup>a</sup> S. Akita,<sup>a</sup> R. Nakano,<sup>a</sup> S. Ito,<sup>a</sup> Y. Hoshimoto,<sup>b</sup> S. Ogoshi<sup>b</sup> and K. Nozaki\*<sup>a</sup>

<sup>a</sup> *Department of Chemistry and Biotechnology, The University of Tokyo, 7-3-1 Hongo,  
Bunkyo-ku, Tokyo 113-8656, Japan*

<sup>b</sup> *Department of Applied Chemistry, Faculty of Engineering, Osaka University, Suita,  
Osaka 565-0871, Japan*

**Contents**

|                                                               |           |
|---------------------------------------------------------------|-----------|
| <b>1. Materials and Methods</b>                               | <b>2</b>  |
| <b>2. Full Data of Polymerization</b>                         | <b>11</b> |
| <b>3. NMR Spectra of Ligands and Catalysts</b>                | <b>13</b> |
| <b>3.1 Data of Ligand Precursors L1 and L2</b>                | <b>13</b> |
| <b>3.2 Data of Palladium Complexes 4a, 4b, 4c, 5a, and 5b</b> | <b>17</b> |
| <b>4. X-ray Crystallographic Data of Complexes 4a and 5a</b>  | <b>32</b> |
| <b>5. NMR Spectra, SEC Charts, and DSC Charts of Polymers</b> | <b>34</b> |
| <b>5.1 Data of Polyethylenes (Table 1)</b>                    | <b>35</b> |
| <b>5.2 Data of Copolymers (Table 2)</b>                       | <b>46</b> |
| <b>6. Determination of the Mean Dihedral Angles</b>           | <b>72</b> |
| <b>7. References</b>                                          | <b>73</b> |

## 1. Materials and Methods

**General:** All reactions and polymerizations were carried out using a standard glovebox or Schlenk techniques under argon purified by passing through a hot column packed with BASF catalyst R3-11. All polymerization reactions were performed in 50-mL stainless steel autoclaves.

**Instrumentation:** Nuclear magnetic resonance (NMR) spectra were recorded on JEOL JNM-ECS400 ( $^1\text{H}$ : 400 MHz,  $^{13}\text{C}$ : 101 MHz) or BRUKER Ascend 500 ( $^1\text{H}$ : 500 MHz,  $^{13}\text{C}$ : 126 MHz) NMR spectrometers at ambient temperature unless otherwise noted. Chemical shift values for protons were referenced to the residual proton resonance of chloroform-*d* ( $\delta$ : 7.26) or 1,1,2,2-tetrachloroethane-*d*<sub>2</sub> ( $\delta$ : 6.00). Quantitative  $^{13}\text{C}$  NMR analyses of polymers were performed in a 5-mm probe on ca. 5–15 weight% solutions of the polymers and 0.05-M Cr(acac)<sub>3</sub> as a relaxation agent in 1,1,2,2-tetrachloroethane unlocked at 120 °C using a 90° pulse of 9.0  $\mu\text{s}$ , a spectral width of 31 kHz, a relaxation time of 5–10 s, an acquisition time of 2 s, and inverse-gated decoupling (JEOL JNM-ECS400) or using a 30° pulse of 16.8  $\mu\text{s}$ , a spectral width of 30 kHz, a relaxation time of 2 s, an acquisition time of 1.1 s, and inverse-gated decoupling (BRUKER Ascend500).<sup>1,2,3</sup> Chemical shift values for carbons are referenced to the carbon resonance of chloroform-*d* ( $\delta$ : 77.16) or 1,1,2,2-tetrachloroethane-*d*<sub>2</sub> ( $\delta$ : 73.80). Size exclusion chromatography (SEC) analyses were carried out with a Tosoh instrument (HLC-8121GPC/HT) equipped with two SEC columns (Tosoh TSKgel GMHHR-H(S) HT) and a refractive index (RI) detector by eluting the columns with 1,2-dichlorobenzene at 1.0 mL/min at 145 °C. Molecular weights were determined using narrow polystyrene standards and were corrected by universal calibration using the Mark–Houwink parameters reported by Rudin *et al.*:  $K = 1.75 \times 10^{-2} \text{ cm}^3/\text{g}$  and  $\alpha = 0.67$  for polystyrene,  $K = 5.90 \times 10^{-2} \text{ cm}^3/\text{g}$  and  $\alpha = 0.69$  for LLDPE.<sup>4</sup> X-ray crystallographic analyses were performed on a Rigaku Varimax with a Saturn diffractometer. Elemental analysis was performed by the Microanalytical Laboratory, Department of Chemistry, Graduate School of Science, The University of Tokyo, or by One-stop Sharing Facility Center for Future Drug Discoveries, Graduate School of Pharmaceutical Sciences, The University of Tokyo. High resolution mass spectra were recorded on JEOL JMS-T100LP AccuTOF LC-plus.

**Materials:** Ethylene (>99.9%) was purchased from Takachiho Chemical Industrial Co., Ltd. (Takachiho), and dried, deoxygenated by passing through a dry column DC-HDF300-A3 made by Nikka Seiko Co., Ltd. Anhydrous dichloromethane, diethyl ether, tetrahydrofuran (THF), and toluene were purchased from Kanto Chemical Co. Inc. (Kanto) and purified by the method of Pangborn *et al.*<sup>5</sup> Dehydrated pentane was purchased from Kanto and used as received. The other solvents were purchased from Kanto, Tokyo Chemical Industry Co., Ltd. (TCI), Sigma-Aldrich Chemical Co. LLC (Aldrich) or Wako Pure Chemical Industries, Ltd. (Wako) and were used as received unless otherwise noted. The following reagents were purchased from TCI and distilled from calcium hydride before use: methyl acrylate, allyl acetate, allyl chloride, and vinyl acetate. The following reagents were purchased and used as received: 6-bromopicolinaldehyde (Kanto), butyllithium in hexane (Kanto), chloromethyl methyl ether (TCI),

di-*tert*-butylchlorophosphine (TCI), 2,6-diisopropylaniline (TCI), *p*-toluidine (TCI), benzhydrol (TCI), silver hexafluoroantimonate (TCI), silver triflate (TCI), hydrogen peroxide (30–35%, Kanto), sodium sulfate (Kanto), sodium thiosulfate (Kanto), and sodium carbonate (Kanto). The following compounds and complexes were prepared according to literature procedures: 2,6-dibenzhydryl-4-methylaniline,<sup>6</sup> PdMeCl(cod),<sup>7</sup> and NaB[3,5-(CF<sub>3</sub>)<sub>2</sub>C<sub>6</sub>H<sub>4</sub>]<sub>4</sub> (NaBAR<sup>F</sup><sub>4</sub>).<sup>8</sup>

### Synthesis of Ligand Precursor L1

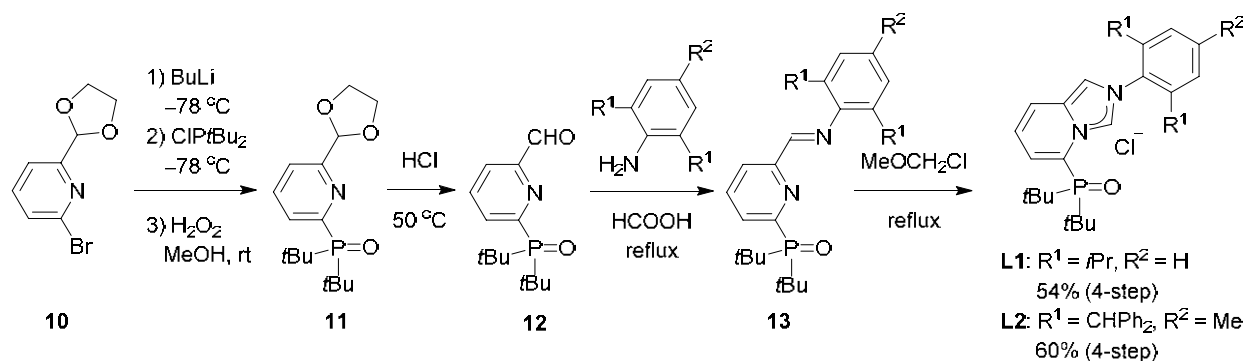

[Synthesis of **11**] A 100-mL Schlenk flask containing a solution of 2-bromo-6-(1,3-dioxolan-2-yl)pyridine<sup>9</sup> **10** (0.95 g, 4.15 mmol) in THF (20 mL) was cooled in dry ice/acetone cold bath. To the solution was added BuLi (1.55 M, 3.2 mL, 4.97 mmol) dropwise while the color of the solution became dark red. After stirring for another 1 h with cooling, *t*Bu<sub>2</sub>PCl (1.0 mL, 5.4 mmol) was added dropwise. Then the cooling bath was removed, and the mixture was stirred overnight at room temperature. The reaction was quenched by slow addition of water (2.0 mL). After the volatile matters were removed in vacuo, methanol (ca. 15 mL) was added to dissolve the crude product. An aqueous solution of hydrogen peroxide (ca. 10 M, 0.84 mL, ca. 8.4 mmol) was added slowly and the mixture was stirred for another 1 h at room temperature. After quenching the excess hydrogen peroxide by aqueous sodium thiosulfate (1.6 g, ca. 10 mmol), the mixture was extracted by dichloromethane twice. The combined organic phase was dried over sodium sulfate, and evaporated to dryness, to afford the crude solid containing **11**, which was used for next step without further purification. <sup>1</sup>H NMR (400 MHz, CDCl<sub>3</sub>) δ 8.14–8.11 (m, 1H), 7.87–7.83 (m, 1H), 7.58–7.56 (m, 1H), 5.85 (s, 1H), 4.20–4.18 (m, 2H), 4.11–4.08 (m, 2H), 1.29 (d, *J* = 14 Hz, 18H); <sup>31</sup>P NMR (162 MHz, CDCl<sub>3</sub>) δ 50.8.

[Synthesis of **12**] To the above crude mixture including **11** in THF (ca. 20 mL) was added aqueous hydrochloric acid (1.0 M, ca. 20 mL), and the mixture was stirred overnight at 50 °C. Then, the mixture was added water (ca. 20 mL) and sodium carbonate until bubbling of carbon dioxide ceased, and extracted with dichloromethane. The organic phase was dried over sodium sulfate, and evaporated to dryness, to afford the crude product including **12** (1.00 g), which was used for next step without further purification. <sup>1</sup>H NMR (500

MHz, CDCl<sub>3</sub>)  $\delta$  10.09 (d,  $J$  = 0.5 Hz, 1H), 8.40–8.37 (m, 1H), 8.03–7.98 (m, 2H), 1.33 (d,  $J$  = 14 Hz, 18H); <sup>31</sup>P NMR (162 MHz, CDCl<sub>3</sub>)  $\delta$  51.5.

[Synthesis of **13a**] In a 50-mL round bottom flask equipped with a reflux condenser, the crude mixture including **12** (1.00 g), 2,6-diisopropylaniline (796 mg, 4.49 mmol) and formic acid (1 drop) was refluxed in methanol (20 mL) overnight. After removing the volatile matters in vacuo, the mixture was purified by silica-gel column chromatography (1<sup>st</sup> elution with ethyl acetate and hexane (1:2) to wash impurities, and then 2<sup>nd</sup> elution with ethyl acetate, hexane and methanol (2:6:1) to elute **13a**), to afford a crude product including **13a** (1.15 g), which was used for next step without further purification. <sup>1</sup>H NMR (500 MHz, CDCl<sub>3</sub>)  $\delta$  8.32 (s, 1H), 8.31–8.29 (m, 1H), 8.24 (dd,  $J$  = 6.8, 4.8 Hz, 1H), 7.96 (td,  $J$  = 7.8, 3.0 Hz, 1H), 7.19–7.12 (m, 3H), 2.95 (sept,  $J$  = 6.9 Hz, 2H), 1.31 (d,  $J$  = 14 Hz, 18 H), 1.19 (d,  $J$  = 6.5 Hz, 12 H).

[Synthesis of **L1**] The crude compound **13a** (1.15 g) and chloromethyl methyl ether (4.1 mL, 53.9 mmol) were refluxed overnight in a 10-mL J-young Schlenk tube. After cooling to room temperature, the volatile matters were removed in vacuo. The crude product was dissolved in dichloromethane (ca. 10 mL), filtered through a pad of Celite, and the pad was washed with dichloromethane twice (ca. 5.0 mL  $\times$  2). The volatile matters were evaporated in vacuo again, and then the crude solid was stirred overnight in dichloromethane (ca. 0.5 mL) and diethyl ether (ca. 20 mL). The formed precipitate was filtered, washed with diethyl ether (ca. 5 mL), and dried under vacuo at 100 °C for 2.0 h, to afford pure **L1** (1.11 g, 2.34 mmol, 54% from **10**) as a colorless solid. <sup>1</sup>H NMR (500 MHz, CDCl<sub>3</sub>)  $\delta$  10.79 (d,  $J$  = 1.5 Hz, 1H), 9.22 (d,  $J$  = 9.0 Hz, 1H), 9.15 (s, 1H), 7.60–7.50 (m, 3H), 7.32 (d,  $J$  = 8.0 Hz, 2H), 2.07 (sept,  $J$  = 6.9 Hz, 2H), 1.38 (d,  $J$  = 15 Hz, 18 H), 1.22 (d,  $J$  = 7.0 Hz, 6H), 1.09 (d,  $J$  = 7.0 Hz, 6H); <sup>31</sup>P NMR (202 MHz, CDCl<sub>3</sub>)  $\delta$  61.9; <sup>13</sup>C NMR (126 MHz, CDCl<sub>3</sub>)  $\delta$  144.9, 132.5 (d,  $J$  = 2.5 Hz, 1C), 132.3, 130.8, 127.4 (d,  $J$  = 3.5 Hz, 2C), 126.8 (d,  $J$  = 8.6 Hz, 1C), 126.0 (d,  $J$  = 1.8 Hz, 1C), 125.2, 124.7 (2C), 123.2 (d,  $J$  = 7.7 Hz, 1C), 119.0, 38.5 (d,  $J$  = 59 Hz, 2C), 28.9 (2C), 26.5 (6C), 24.7 (2C), 23.9 (2C). HRMS-ESI ( $m/z$ ) calcd for C<sub>27</sub>H<sub>40</sub>N<sub>2</sub>OP ([M+H]<sup>+</sup>) 439.2878, found 439.2900.

### Synthesis of Ligand Precursor **L2**

[Synthesis of **13b**] In a 50-mL round bottom flask equipped with a reflux condenser, a crude compound **12** (0.66 g, synthesized from **10** (0.64 g, 2.76 mmol) as above mentioned), 2,6-dibenzhydryl-4-methylaniline (493 mg, 1.12 mmol), and formic acid (1 drop) was refluxed in methanol (20 mL) overnight. After removing the volatile matters in vacuo, the mixture was purified by silica-gel column chromatography (1<sup>st</sup> elution with

ethyl acetate and hexane (1:1) to wash impurities, and then 2nd elution with ethyl acetate, hexane and ethanol (30:10:3) to elute **13b**), to afford a crude product including **13b** (1.02 g), which was used for next step without further purification.  $^1\text{H}$  NMR (400 MHz,  $\text{CDCl}_3$ )  $\delta$  8.16 (dt,  $J = 8.0, 1.6$  Hz, 1H), 8.11 (ddd,  $J = 7.6, 4.4, 1.2$  Hz, 1H), 7.85 (td,  $J = 7.6, 2.8$  Hz, 1H), 7.18–7.08 (m, 12H), 7.04 (s, 1H), 7.01–6.98 (m, 8H), 6.66 (s, 2H), 5.43 (s, 2H), 2.15 (s, 3H), 1.15 (d,  $J = 14$  Hz, 18H);  $^{31}\text{P}$  NMR (162 MHz,  $\text{CDCl}_3$ )  $\delta$  50.5.

[Synthesis of **L2**] The crude compound **13b** (1.02 g) and chloromethyl methyl ether (2.2 mL, 29.6 mmol) were refluxed overnight in a 10-mL J-young Schlenk tube. After cooling to room temperature, the volatile matters were removed in vacuo. The crude product was dissolved in dichloromethane (ca. 10 mL), filtered through a pad of Celite, and the pad was washed with dichloromethane twice (ca. 5.0 mL  $\times$  2). The volatile matters were evaporated in vacuo again, and then the crude solid was stirred overnight in dichloromethane (ca. 0.5 mL) and diethyl ether (ca. 20 mL). The formed precipitate was filtered, washed with diethyl ether (ca. 5 mL), and dried under vacuo at 100  $^\circ\text{C}$  for 2.0 h, to afford pure **L2** (1.01 g, 1.37 mmol, 60% from **10**) as a colorless solid.  $^1\text{H}$  NMR (500 MHz,  $\text{CDCl}_3$ )  $\delta$  10.13 (s, 1H), 8.43 (d,  $J = 5.5$  Hz, 1H), 8.26 (s, 1H), 7.56–7.54 (m, 2H), 7.23–7.15 (m, 12H), 6.91–6.86 (m, 8H), 6.79 (s, 2H), 5.12 (s, 2H), 2.23 (s, 3H), 1.22 (d,  $J = 15$  Hz, 18H);  $^{31}\text{P}$  NMR (202 MHz,  $\text{CDCl}_3$ )  $\delta$  61.7;  $^{13}\text{C}$  NMR (126 MHz,  $\text{CDCl}_3$ )  $\delta$  141.8, 141.4, 141.2, 140.4, 131.2 (d,  $J = 2.4$  Hz, 1C), 130.9, 130.8 (2C), 129.3 (4C), 129.0 (8C), 128.8 (4C), 127.6, 127.4, 127.4 (2C), 127.0–126.9 (2C), 124.8 (d,  $J = 67$  Hz, 1C), 124.1, 123.7–123.6 (2C), 118.1, 52.0 (2C), 38.3 (d,  $J = 59$  Hz, 2C), 26.5 (6C), 22.0. HRMS-ESI ( $m/z$ ) calcd for  $\text{C}_{44}\text{H}_{35}\text{N}_2\text{OP}$  ( $[\text{M}+\text{H}]^+$ ) 701.3661, found 701.3648.

### Synthesis of Palladium Complexes **4a** and **4b**

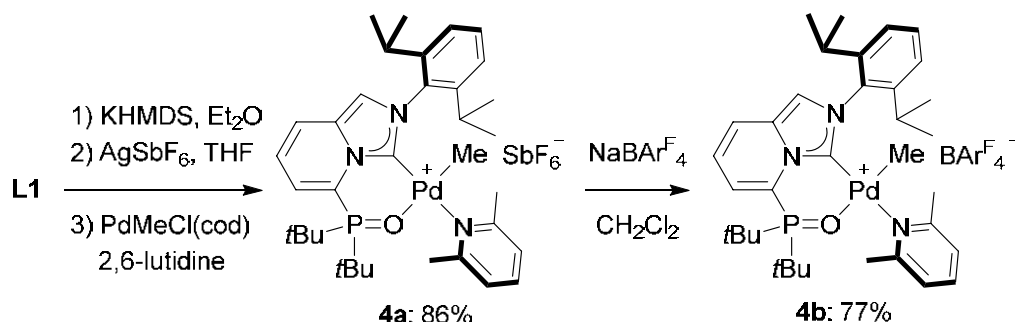

[Synthesis of **4a**] In a glove box, **L1** (60 mg, 0.13 mmol) and potassium bis(trimethylsilyl)amide (KHMDS, 27 mg, 0.13 mmol) were dissolved in diethyl ether (ca. 5.0 mL) in a 15-mL scintillation vial, and the mixture was stirred for 15 min at room temperature. Then, the mixture was filtered through a pad of Celite and the pad was washed with diethyl ether (ca. 2.0 mL). To the filtrate were added  $\text{AgSbF}_6$  (35 mg, 0.14 mmol) and

THF (ca. 3.0 mL), and the mixture was stirred for 1 h at ambient temperature under darkness. Then, PdMeCl(cod) (34 mg, 0.13 mmol) and 2,6-lutidine (14 mg, 0.13 mmol) were added, and the mixture was stirred for 3 h at ambient temperature under darkness. The mixture was filtered through a pad of Celite and the pad was washed with THF (ca. 3.0 mL). After the volatiles matters were removed under vacuum, the crude product was washed with diethyl ether (ca. 5.0 mL) and dried under vacuum for 1 h to afford complex **4a** as pale yellow solid (98 mg, 86%). The single crystal for X-ray crystallographic analysis was obtained by slow volatilization of saturated solution of complex **4a** with dichloromethane and hexane. <sup>1</sup>H NMR (500 MHz, CDCl<sub>3</sub>) δ 7.75 (d, *J* = 9.5 Hz, 1H), 7.59 (t, *J* = 7.8 Hz, 1H), 7.49–7.46 (m, 2H), 7.32–7.28 (m, 3H), 7.21 (t, *J* = 7.8 Hz, 1H), 7.13 (d, *J* = 7.5 Hz, 2H), 3.02 (s, 6H), 2.90 (sept, *J* = 7.0 Hz, 2H), 1.37 (d, *J* = 6.5 Hz, 6H), 1.27 (d, *J* = 15 Hz, 18H), 1.01 (d, *J* = 6.5 Hz, 6H), –0.30 (s, 3H). <sup>31</sup>P NMR (202 MHz, CDCl<sub>3</sub>) δ 63.0. <sup>13</sup>C NMR (126 MHz, CDCl<sub>3</sub>) δ 162.6, 158.8, 144.5, 138.3, 136.8, 131.2 (d, *J* = 2.8 Hz, 1C), 130.5, 127.2 (d, *J* = 77 Hz, 1C), 126.5 (d, *J* = 12 Hz, 2C), 124.3 (2C), 123.4 (d, *J* = 2.5 Hz, 1C), 122.8 (2C), 121.1 (d, *J* = 10 Hz, 2C), 118.5, 38.5 (d, *J* = 59 Hz, 2C), 28.8 (2C), 27.1 (2C), 27.0 (6C), 25.6 (2C), 22.9 (2C), –10.7. HRMS-ESI (*m/z*) calcd for C<sub>35</sub>H<sub>51</sub>N<sub>3</sub>OPPd ([M+H]<sup>+</sup>) 666.2799, found 666.2824.

[Synthesis of **4b**] In a 20-mL Schlenk flask, complex **4a** (98 mg, 0.11 mmol) and NaBAr<sup>F</sup><sub>4</sub> (77 mg, 0.087 mmol) in dichloromethane (ca. 10 mL) were stirred overnight at ambient temperature. The volatile matters were removed under vacuum and then the Schlenk flask was transferred into the glove box. The mixture was extracted with diethyl ether (ca. 10 mL) twice, and the combined filtrate was evaporated to dryness. Finally the mixture was washed with pentane (ca. 5.0 mL) and dried under vacuum for 1 h at ambient temperature to afford complex **4b** as a pale yellow solid (128 mg, 77%). <sup>1</sup>H NMR (500 MHz, CDCl<sub>3</sub>) δ 7.71 (s, 8H), 7.58–7.55 (m, 2H), 7.514 (s, 4H), 7.50–7.48 (m, 1H), 7.45 (s, 1H), 7.30 (d, *J* = 7.5 Hz, 2H), 7.10 (d, *J* = 8.0 Hz, 2H), 7.05–7.01 (m, 1H), 6.89–6.86 (m, 1H), 3.00 (s, 6H), 2.86 (sept, *J* = 6.8 Hz, 2H), 1.37 (d, *J* = 7.0 Hz, 6H), 1.20 (d, *J* = 15 Hz, 18H), 0.99 (d, *J* = 7.0 Hz, 6H), –0.27 (s, 3H). <sup>31</sup>P NMR (202 MHz, CDCl<sub>3</sub>) δ 62.6; <sup>19</sup>F NMR (470 MHz, CDCl<sub>3</sub>) δ –62.4; <sup>13</sup>C NMR (126 MHz, CDCl<sub>3</sub>) δ 163.8, 162.4–161.3 (m, 4C), 158.7, 144.3, 138.4, 136.6, 134.9 (8C), 130.8 (d, *J* = 2.8 Hz, 1C), 130.8, 129.0 (qq, *J* = 31, 2.8 Hz, 8C), 128.1 (d, *J* = 77 Hz, 1C), 124.7 (q, *J* = 273 Hz, 8C), 125.1 (d, *J* = 12 Hz, 2C), 124.5 (2C), 123.3 (d, *J* = 2.6 Hz, 1C), 122.8 (2C), 119.7 (d, *J* = 10 Hz, 2C), 118.6, 117.6 (sept, *J* = 3.8 Hz, 4C), 38.5 (d, *J* = 58 Hz, 2C), 28.9 (2C), 27.0 (2C), 26.9 (6C), 25.5 (2C), 22.8 (2C), –10.2. Elemental analysis, Calcd for C<sub>67</sub>H<sub>63</sub>BF<sub>24</sub>N<sub>3</sub>OPPd C, 52.58; H, 4.15; N, 2.75. found C, 52.03; H, 4.34; N, 2.69. HRMS-ESI (*m/z*) calcd for C<sub>35</sub>H<sub>51</sub>N<sub>3</sub>OPPd ([M+H]<sup>+</sup>) 666.2799, found 666.2823.

## Synthesis of Palladium Complex 4c

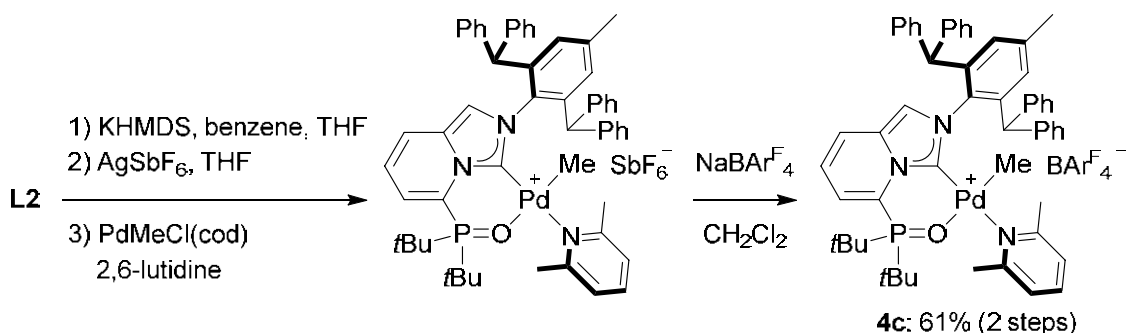

[Synthesis of **4c**] In a glove box, **L2** (50 mg, 0.068 mmol) and KHMDS (15 mg, 0.071 mmol) were dissolved in benzene/THF (ca. 3.0 mL each) in a 15-mL scintillation vial, and the mixture was stirred for 15 min at room temperature. Then, the mixture was filtered through a pad of Celite and the pad was washed with THF (ca. 3.0 mL). To this filtrate was added AgSbF<sub>6</sub> (19 mg, 0.074 mmol). The mixture was stirred at ambient temperature under darkness for ca. 0.5 h and PdMeCl(cod) (18 mg, 0.068 mmol) and 2,6-lutidine (7.3 mg, 0.068 mmol) were added and the mixture was stirred for another 3 h at ambient temperature under darkness. The mixture was filtered through a pad of Celite and the pad was washed with THF (ca. 3.0 mL). After the volatiles were removed in vacuo, the crude product was washed with diethyl ether and dried under vacuum for 1 h, to afford the palladium hexafluoroantimonate complex (59 mg, 0.051 mmol), which was used for next step without further purification. <sup>1</sup>H NMR (500 MHz, CDCl<sub>3</sub>) δ 7.66 (t, *J* = 7.8 Hz, 1H), 7.30–7.06 (m, 17H), 6.98–6.88 (m, 2H), 6.85 (s, 2H), 6.81–6.79 (m, 2H), 6.72–6.70 (m, 4H), 5.50 (s, 1H), 5.48 (s, 2H), 3.15 (s, 6H), 2.25 (s, 3H), 1.34 (d, *J* = 15 Hz, 18H), 0.05 (s, 3H); <sup>31</sup>P NMR (202 MHz, CDCl<sub>3</sub>) δ 63.3.

In a 20-mL Schlenk flask, the above palladium hexafluoroantimonate complex and NaBARF<sub>4</sub> (36 mg, 0.041 mmol) in dichloromethane (ca. 10 mL) were stirred overnight at ambient temperature. The volatile matters were removed and then the Schlenk flask was transferred into the glove box. The mixture was extracted with diethyl ether (ca. 10 mL), and passed through a pad of Celite with the aid of additional ether (3.0 mL). The extraction was repeated twice, and the combined filtrate was evaporated to dryness. Finally the mixture was washed with pentane and dried under vacuum for 1 h to afford complex **4c** as a pale yellow solid (74 mg, 61% over two steps). <sup>1</sup>H NMR (500 MHz, CDCl<sub>3</sub>) δ 7.72 (s, 8H), 7.61 (t, *J* = 7.8 Hz, 1H), 7.51 (s, 4H), 7.31–7.20 (m, 6H), 7.17 (d, *J* = 8.0 Hz, 2H), 7.14–7.08 (m, 8H), 6.98–6.94 (m, 1H), 6.90–6.87 (m, 1H), 6.85 (s, 2H), 6.79–6.74 (m, 2H), 6.71–6.69 (m, 4H), 6.65–6.62 (m, 1H), 5.52 (d, *J* = 1.0 Hz, 1H), 5.46 (s, 2H), 3.13 (s, 6H), 2.26 (s, 3H), 1.30 (s, 9H), 1.27 (s, 9H), 0.08 (s, 3H); <sup>31</sup>P NMR (202 MHz, CDCl<sub>3</sub>) δ 62.7; <sup>19</sup>F NMR (470 MHz, CDCl<sub>3</sub>) δ –62.4; <sup>13</sup>C NMR (126 MHz, CDCl<sub>3</sub>) δ 162.4–161.3 (m, 4C) 158.7, 158.5, 142.4, 141.9, 141.2, 140.7, 140.6, 140.6 (d, *J* = 5.0 Hz, 1C), 140.0, 138.5, 136.5, 134.9 (8C), 130.2 (2C), 129.7 (4C), 129.1, 129.0 (qq, *J* = 31, 2.8 Hz, 8C), 129.5 (d, *J* = 2.9 Hz, 1C), 128.9 (4C), 128.7 (d, *J* = 4.7 Hz, 8C), 127.7 (d, *J* =

4.0 Hz, 1C), 127.1 (d,  $J = 5.0$  Hz, 4C), 124.7 (q,  $J = 273$  Hz, 8C), 124.5 (d,  $J = 12$  Hz, 1C), 123.6 (d,  $J = 2.8$  Hz, 1C), 123.0, 120.8, 118.5 (d,  $J = 10$  Hz, 1C), 117.6 (sept,  $J = 3.8$  Hz, 4C), 52.3 (2C), 38.8 (d,  $J = 58$  Hz, 2C), 27.3 (2C), 26.9 (6C), 26.3, 22.0,  $-9.3$ . Elemental analysis, Calcd for  $C_{88}H_{73}BF_{24}N_3OPPd$  C, 58.96; H, 4.10; N, 2.34. found C, 59.10; H, 4.51; N, 2.44. HRMS-ESI ( $m/z$ ) calcd for  $C_{56}H_{61}N_3OPPd$  ( $[M+H]^+$ ) 928.3582, found 928.3626.

### Synthesis of Palladium Complexes **5a** and **5b**

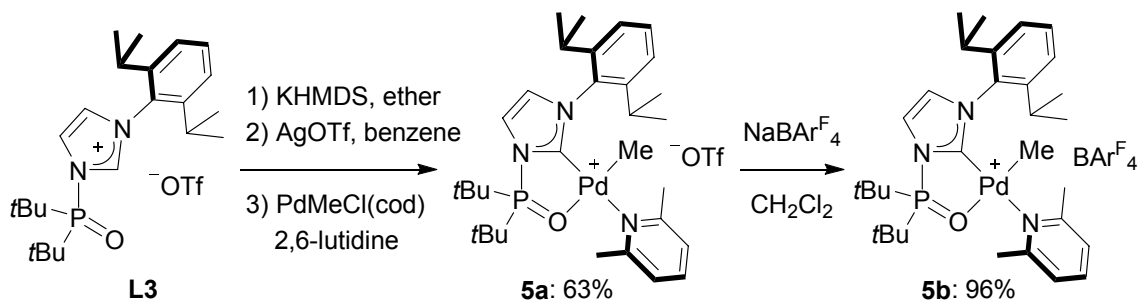

[Synthesis of **5a**] In a glove box, **L3**<sup>10</sup> (30 mg, 0.056 mmol) and KHMDS (12 mg, 0.056 mmol) were dissolved in ether (ca. 5.0 mL) in a 15-mL scintillation vial, and the mixture was stirred for 1 h at room temperature under darkness. The mixture was filtered through a pad of Celite and the pad was washed with diethyl ether (ca. 3.0 mL). To the filtrate were added AgOTf (14 mg, 0.056 mmol) and THF (ca. 3.0 mL), and the mixture was stirred for 2 h at ambient temperature under darkness. To the resulting mixture were added PdMeCl(cod) (15 mg, 0.056 mmol) and 2,6-lutidine (6.0 mg, 0.056 mmol), and the mixture was stirred under darkness overnight at ambient temperature. The mixture was filtered through a pad of Celite and the pad was washed with THF (ca. 3.0 mL). After the volatile matters of the filtrate were removed in vacuo, benzene (ca. 5.0 mL) was added into the mixture. The mixture was filtered through a pad of Celite and washed with benzene (ca. 3.0 mL). The remaining white solid on the pad of Celite was extracted by THF. The volatile matters of the filtrate were removed under vacuum and the remaining solid was washed with diethyl ether and dried under vacuum for ca. 1 h at ambient temperature to afford complex **5a** as a colorless solid (27 mg, 63%). The single crystal for X-ray crystallographic analysis was obtained by slow volatilization of saturated solution of complex **5a** with dichloromethane and hexane. <sup>1</sup>H NMR (500 MHz, CDCl<sub>3</sub>)  $\delta$  8.25 (s, 1H), 7.61 (t,  $J = 7.8$  Hz, 1H), 7.45 (t,  $J = 8.0$  Hz, 1H), 7.24 (d,  $J = 7.5$  Hz, 2H), 7.13 (d,  $J = 8.0$  Hz, 2H), 2.95 (s, 6H), 2.54 (sept,  $J = 6.9$  Hz, 2H), 1.47 (d,  $J = 16$  Hz, 18H), 1.32 (d,  $J = 6.5$  Hz, 6H), 1.17 (d,  $J = 6.5$  Hz, 6H),  $-0.25$  (s, 3H); <sup>31</sup>P NMR (202 MHz, CDCl<sub>3</sub>)  $\delta$  85.4; <sup>19</sup>F NMR (470 MHz, CDCl<sub>3</sub>)  $\delta$   $-78.2$ ; <sup>13</sup>C NMR (126 MHz, CDCl<sub>3</sub>)  $\delta$  175.2 (d,  $J = 11$  Hz, 1C), 158.9, 144.8, 138.6, 134.8, 130.9, 128.3 (d,  $J = 4.2$  Hz, 2C), 124.2 (2C), 122.9 (2C), 122.9 (2C), 121.0 (q,  $J = 321$  Hz, 1C), 37.9 (d,  $J = 62$  Hz, 2C), 28.8 (2C), 26.6 (2C), 26.2 (6C), 24.5 (2C), 23.2 (2C),  $-9.7$ . Elemental analysis, Calcd for  $C_{32}H_{49}F_3N_3O_4PPdS$  C, 50.16;



H, 6.45; N, 5.48. found C, 49.71; H, 6.42; N, 5.32.

[Synthesis of **5b**] In the glove box, complex **5a** (30 mg, 0.039 mmol) and NaBAR<sup>F</sup><sub>4</sub> (31 mg, 0.035 mmol) were added into a 20 mL Schlenk flask and the flask was transferred outside of glove box. After dichloromethane (ca. 10 mL) was added under the argon atmosphere, the mixture was stirred for 3 h at ambient temperature. The volatile matters were removed under vacuum at ambient temperature and the Schlenk was then transferred into glove box. After diethyl ether (ca. 10 mL) was added, the mixture was filtered through a pad of Celite and the pad was washed with diethyl ether (ca. 3.0 mL). The extraction was repeated twice, and the combined filtrate was evaporated to dryness. The white solid product is washed with pentane (ca. 10 mL) and dried under vacuum for 1 h at ambient temperature, to afford **5b** as a colorless solid (50 mg, 96%). <sup>1</sup>H NMR (500 MHz, CDCl<sub>3</sub>) δ 7.71 (s, 8H), 7.58 (t, *J* = 7.8 Hz, 1H), 7.52 (s, 4H), 7.49 (t, *J* = 7.8 Hz, 1H), 7.30 (d, *J* = 2.0 Hz, 1H), 7.28 (s, 2H), 7.11–7.10 (m, 3H), 2.92 (s, 6H), 2.49 (sept, *J* = 7.0 Hz, 2H), 1.36 (d, *J* = 16 Hz, 18H), 1.33 (d, *J* = 7.0 Hz, 6H), 1.14 (d, *J* = 7.0 Hz, 6H), –0.19 (s, 3H); <sup>31</sup>P NMR (202 MHz, CDCl<sub>3</sub>) δ 84.3; <sup>19</sup>F NMR (470 MHz, CDCl<sub>3</sub>) δ –62.4; <sup>13</sup>C NMR (126 MHz, CDCl<sub>3</sub>) δ 177.8 (d, *J* = 11 Hz, 1C), 162.4–161.3 (m, 4C), 158.7, 144.6, 138.8, 134.9 (8C), 134.3, 131.4, 129.0 (qq, *J* = 31, 2.8 Hz, 8C), 127.6 (d, *J* = 3.9 Hz, 2C), 124.5 (2C), 123.0 (2C), 119.9 (d, *J* = 4.3 Hz, 2C), 117.6 (sep, *J* = 3.8 Hz, 4C), 37.9 (d, *J* = 62 Hz, 2C), 29.0 (2C), 26.5 (2C), 25.8 (6C), 24.4 (2C), 23.0 (2C), –8.9. HRMS-ESI (*m/z*) calcd for C<sub>31</sub>H<sub>49</sub>N<sub>3</sub>OPPd ([M+H]<sup>+</sup>) 616.2643, found 616.2614.

### **Procedure of Ethylene Homopolymerization (Table 1, Entries 1–7)**

A 50-mL stainless steel autoclave was dried in an oven for 3 h at 120 °C, sealed, and evacuated under vacuum for 2 h at 140 °C. After cooling to room temperature, a freshly prepared solution of catalyst (2.5  $\mu$ mol, 5.0 mL of 0.50 mmol/L solution in toluene) and dehydrated toluene (5.0 mL) were added under argon atmosphere. Then, the autoclave was pressurized with ethylene (3.0 MPa), sealed, and stirred in an isothermal heating block under given conditions. After cooling to room temperature and venting redundant ethylene, the reaction was quenched by addition of ethanol (ca. 20 mL). The formed precipitates were collected by filtration, washed with ethanol, and dried under high vacuum for at least 2 h at 100 °C to afford polyethylene. The molecular weight and molecular weight distribution were determined by size exclusion chromatography. The extent of branching in the polymer backbone was determined by quantitative  $^{13}\text{C}$  NMR analysis.

### **Procedure of Ethylene Oligomerization (Table 1, Entry 8)**

A 50-mL stainless steel autoclave was dried in an oven for 3 h at 120 °C, sealed, and evacuated under vacuum for 2 h at 140 °C. After cooling to room temperature, a freshly prepared solution of catalyst (2.5  $\mu$ mol, 5.0 mL of 0.50 mmol/L solution in toluene) and dehydrated toluene (5.0 mL) were added under argon atmosphere. Then, the autoclave was pressurized with ethylene (3.0 MPa), sealed, and stirred in an isothermal heating block under given conditions. After cooling with ice-water bath and venting redundant ethylene, tridecane (32 mg) was added and the mixture was stirred for 2 min and the product was analyzed by gas chromatography.

### **Procedure of Ethylene/Polar Monomer Copolymerization (Table 2)**

A 50-mL stainless steel autoclave was dried in an oven for 3 h at 120 °C, sealed, and evacuated under vacuum for 2 h at 140 °C. After cooling to room temperature, a solution of catalyst **4b** (5.0  $\mu$ mol, 5.0 mL of 1.0 mmol/L solution in toluene) was added under argon atmosphere. To the mixture were added 2.0 mL of a polar monomer and 3.0 mL of toluene (entries 1, 3, and 5) or 5.0 mL of a polar monomer (entries 2, 4, 6, and 7). Then the autoclave was charged with ethylene (3.0 MPa), sealed, and stirred in an isothermal heating block for 3.0 h at 30 °C.

After cooling to room temperature and venting redundant ethylene, the reaction was quenched by addition of ethanol (ca. 20 mL), and the volatile matters were removed in vacuo. After THF (ca. 30 mL) was added, the formed precipitates were collected by filtration, washed with THF (ca. 10 mL), and dried under high vacuum for at least 3.0 h at 100 °C to afford ethylene/polar monomer copolymers. The molecular weight and molecular weight distribution were determined by size exclusion chromatography. The incorporation ratio of polar monomers was calculated based on  $^1\text{H}$  NMR analysis.

## 2. Full Data of Polymerization

**Table S1.** Ethylene Polymerization by Various Palladium Complexes<sup>[a]</sup>

| entry               | catalyst                   | T<br>(°C) | time<br>(h) | polymer<br>(g) | activity<br>(kg/mol·h) | $M_n^{[b]}$<br>(kg/mol) | $M_w/M_n^{[b]}$ | branch <sup>[c]</sup> | $T_m$<br>(°C) <sup>[d]</sup> |
|---------------------|----------------------------|-----------|-------------|----------------|------------------------|-------------------------|-----------------|-----------------------|------------------------------|
| 1                   | <b>4b</b> (2.5 $\mu$ mol)  | 30        | 1.0         | 0.11           | 44                     | 12                      | 2.1             | 0                     | 133.4                        |
| 2                   | <b>4b</b> (2.5 $\mu$ mol)  | 30        | 2.0         | 0.25           | 50                     | 11                      | 2.3             | 0                     | 133.3                        |
| 3                   | <b>4b</b> (2.5 $\mu$ mol)  | 30        | 5.0         | 0.42           | 44                     | 13                      | 2.0             | 0                     | 132.7                        |
| 4                   | <b>4b</b> (2.5 $\mu$ mol)  | 30        | 10          | 0.84           | 34                     | 11                      | 2.3             | 0                     | 132.3                        |
| 5                   | <b>4b</b> (2.5 $\mu$ mol)  | 50        | 1.0         | 0.38           | 152                    | 7.2                     | 2.3             | 0                     | 131.6                        |
| 6                   | <b>4b</b> (2.5 $\mu$ mol)  | 50        | 2.0         | 0.41           | 83                     | 6.5                     | 2.3             | 0                     | 131.6                        |
| 7                   | <b>4c</b> (2.5 $\mu$ mol)  | 30        | 2.0         | 0.15           | 29                     | 19                      | 2.2             | 0                     | 133.6                        |
| 8                   | <b>5b</b> (2.5 $\mu$ mol)  | 30        | 2.0         | trace          | ---                    | oligomer                |                 | ---                   | ---                          |
| S1                  | <b>3a</b> (5.0 $\mu$ mol)  | 30        | 2.0         | 0.011          | 1.1                    | 2.9                     | 1.6             | ---                   | ---                          |
| S2 <sup>[e]</sup>   | <b>3a</b> (1.0 $\mu$ mol)  | 80        | 1.0         | 0.033          | 33                     | 26                      | 2.1             | 4.5                   | ---                          |
| S3 <sup>[e]11</sup> | <b>3a</b> (1.0 $\mu$ mol)  | 100       | 1.0         | 0.69           | 690                    | 76                      | 2.4             | 11.6                  | ---                          |
| S4                  | <b>2a</b> (2.5 $\mu$ mol)  | 30        | 2.0         | 0.017          | 3.4                    | 17                      | 1.5             | ---                   | ---                          |
| S5 <sup>[f]</sup>   | <b>2a</b> (0.75 $\mu$ mol) | 100       | 1.0         | 2.0            | 2700                   | 31                      | 3.1             | 5                     | ---                          |
| S6                  | <b>1a</b> (2.5 $\mu$ mol)  | 30        | 2.0         | 2.1            | 427                    | 15                      | 4.8             | ---                   | ---                          |

[a] A mixture of catalyst (2.5  $\mu$ mol) and ethylene (3.0 MPa) in toluene (10 mL) was stirred under the indicated. [b] Number-average molecular weight determined by size-exclusion chromatography using polystyrene as an internal standard and corrected by universal calibration. [c] Methyl branches per 1000C determined by quantitative <sup>13</sup>C NMR analyses. [d] Melting temperature determined by DSC analysis. [e] Data from reference 11; Ethylene (4.0 MPa), toluene 20 mL. [f] Data from reference 12; toluene 15 mL.

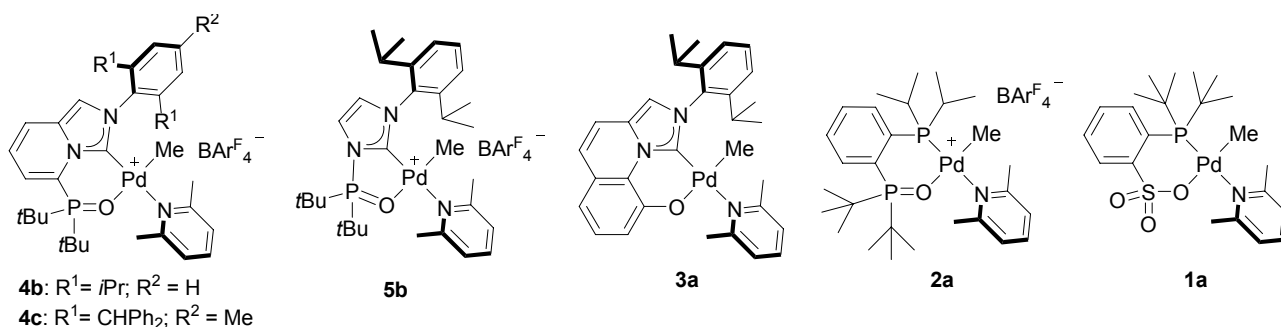

**Table S2.** Copolymerization of Ethylene with Polar Monomers by Complex **4b**<sup>[a]</sup>

| entry             | cat.      | comonomer (mL) | polymer (mg) | activity (kg/mol·h) | $M_n^{[b]}$ (kg/mol) | $M_w/M_n^{[b]}$ | i.r. <sup>[c]</sup> (mol%) | yield based on comonomer <sup>[d]</sup> (%) | branch <sup>[e]</sup> | $T_m$ (°C) <sup>[f]</sup> |
|-------------------|-----------|----------------|--------------|---------------------|----------------------|-----------------|----------------------------|---------------------------------------------|-----------------------|---------------------------|
| 1                 | <b>4b</b> | AAc (2.0)      | 198          | 13                  | 9.4                  | 2.3             | 0.15                       | 0.057                                       | nd                    | 131.2                     |
| 2                 | <b>4b</b> | AAc (5.0)      | 67           | 4.5                 | 7.4                  | 2.2             | 0.58                       | 0.030                                       | nd                    | 126.3                     |
| 3                 | <b>4b</b> | MA (2.0)       | 72           | 4.8                 | 7.0                  | 2.3             | 0.27                       | 0.031                                       | nd                    | 131.2                     |
| 4                 | <b>4b</b> | MA (5.0)       | 26           | 1.7                 | 4.8                  | 2.1             | 0.61                       | 0.010                                       | nd                    | 128.6                     |
| 5 <sup>[g]</sup>  | <b>4b</b> | MA (5.0)       | 127          | 2.1                 | 4.1                  | 2.7             | 0.50                       | 0.041                                       | 0                     | 129.2                     |
| 6 <sup>[h]</sup>  | <b>4b</b> | MA (5.0)       | 0            | ---                 | ---                  | ---             | ---                        | ---                                         | ---                   | ---                       |
| 7                 | <b>4b</b> | AC (2.0)       | 71           | 4.7                 | 8.1                  | 2.1             | 0.19                       | 0.020                                       | nd                    | 130.1                     |
| 8                 | <b>4b</b> | AC (5.0)       | 38           | 2.5                 | 6.8                  | 2.1             | 0.47                       | 0.010                                       | nd                    | 128.1                     |
| 9 <sup>[i]</sup>  | <b>4b</b> | VA (5.0)       | 25           | 2.5                 | 6.9                  | 2.3             | 0                          | ---                                         | nd                    | 131.4                     |
| S1 <sup>[j]</sup> | <b>3a</b> | AAc (1.0)      | 134          | 4.5                 | 7.4                  | 2.5             | 1.4                        | ---                                         | 6.3                   | ---                       |
| S2 <sup>[j]</sup> | <b>3a</b> | MA (0.2)       | 319          | 11                  | 17                   | 2.0             | 0.8                        | ---                                         | 8.1                   | ---                       |
| S3 <sup>[j]</sup> | <b>3a</b> | AC (0.4)       | 38           | 1.3                 | 3.9                  | 2.1             | 0.5                        | ---                                         | 4.3                   | ---                       |
| S4 <sup>[j]</sup> | <b>3a</b> | VA (1.0)       | 188          | 6.3                 | 11                   | 2.5             | <0.1                       | ---                                         | 7.4                   | ---                       |

[a] A mixture of catalyst (5.0  $\mu$ mol), polar monomer, and ethylene (3.0 MPa) in toluene (10 mL including polar monomer) was stirred at 30 °C for 3.0 h under the conditions mentioned in Table S2. Abbreviations, AAc: allyl acetate, MA: methyl acrylate, AC: allyl chloride, VA: vinyl acetate, nd: not determined. [b] Number-average molecular weight measured by size-exclusion chromatography using polystyrene as an internal standard and corrected by universal calibration. [c] Molar ratio of polar monomers incorporated in copolymers to ethylene polymerized, calculated based on <sup>1</sup>H NMR spectra of copolymers. [d] Molar ratio of the amount of polar monomers incorporated into copolymers to that used in the feed. [e] Methyl branches per 1000 C determined by quantitative <sup>13</sup>C NMR analyses. [f] Melting temperature determined by DSC analysis. [g] Catalyst (20  $\mu$ mol). [h] Homopolymerization of methyl acrylate in the absence of ethylene. [i] Polymerization time: 2.0 h. [j] A mixture of catalyst **3a** (10  $\mu$ mol), polar monomer, and ethylene (4.0 MPa) in toluene (20 mL including polar monomer) was stirred at 100 °C for 3.0 h under the conditions mentioned in Table S2.

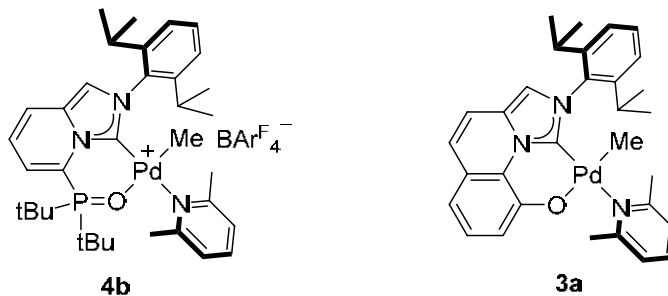

### 3. NMR Spectra of Ligands and Catalysts

#### 3.1 Ligand Precursors L1 and L2

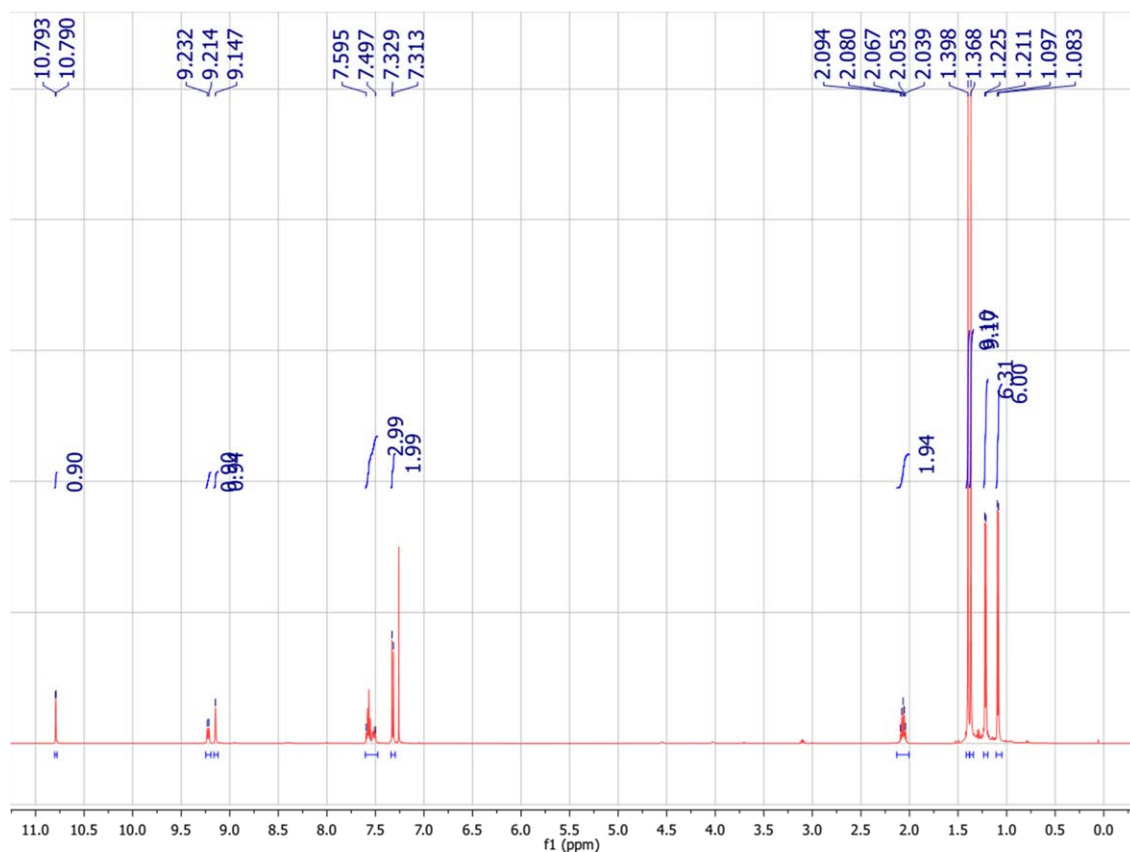

Figure S1: <sup>1</sup>H NMR (500 Hz, CDCl<sub>3</sub>) spectrum of ligand precursor L1.

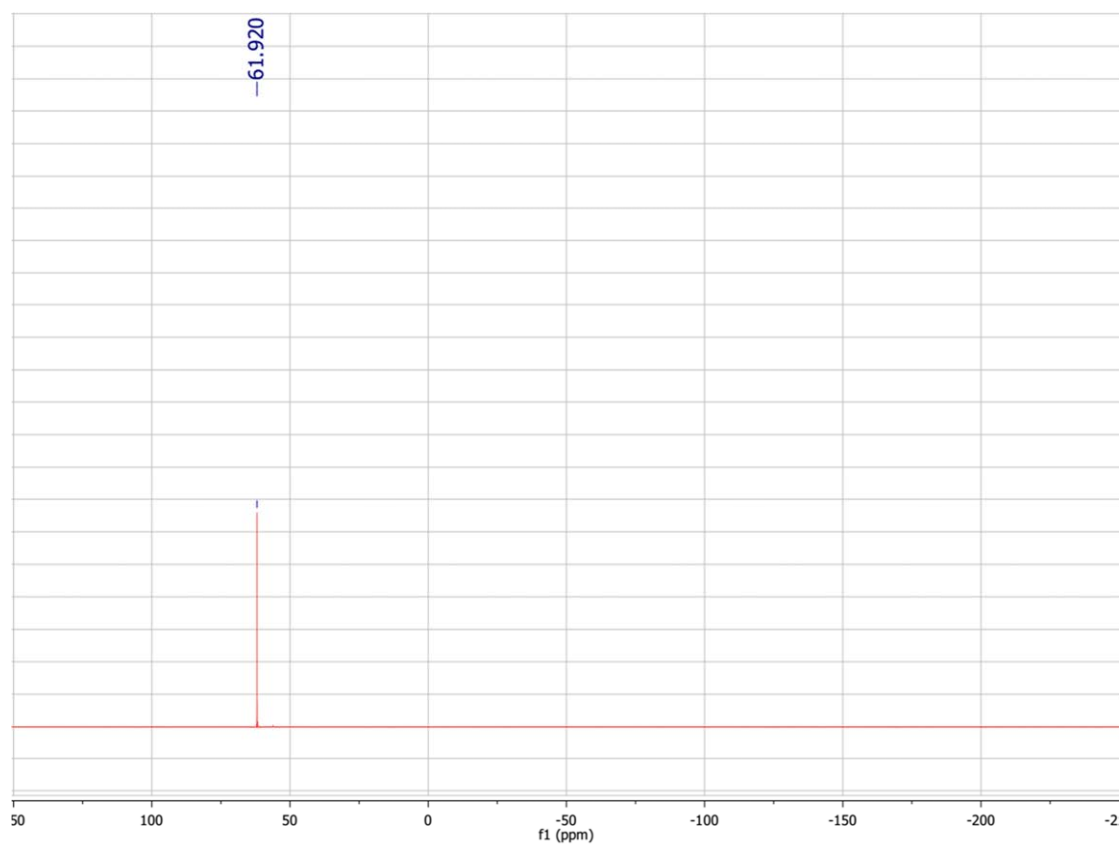

Figure S2: <sup>31</sup>P NMR (202 Hz, CDCl<sub>3</sub>) spectrum of ligand precursor L1.

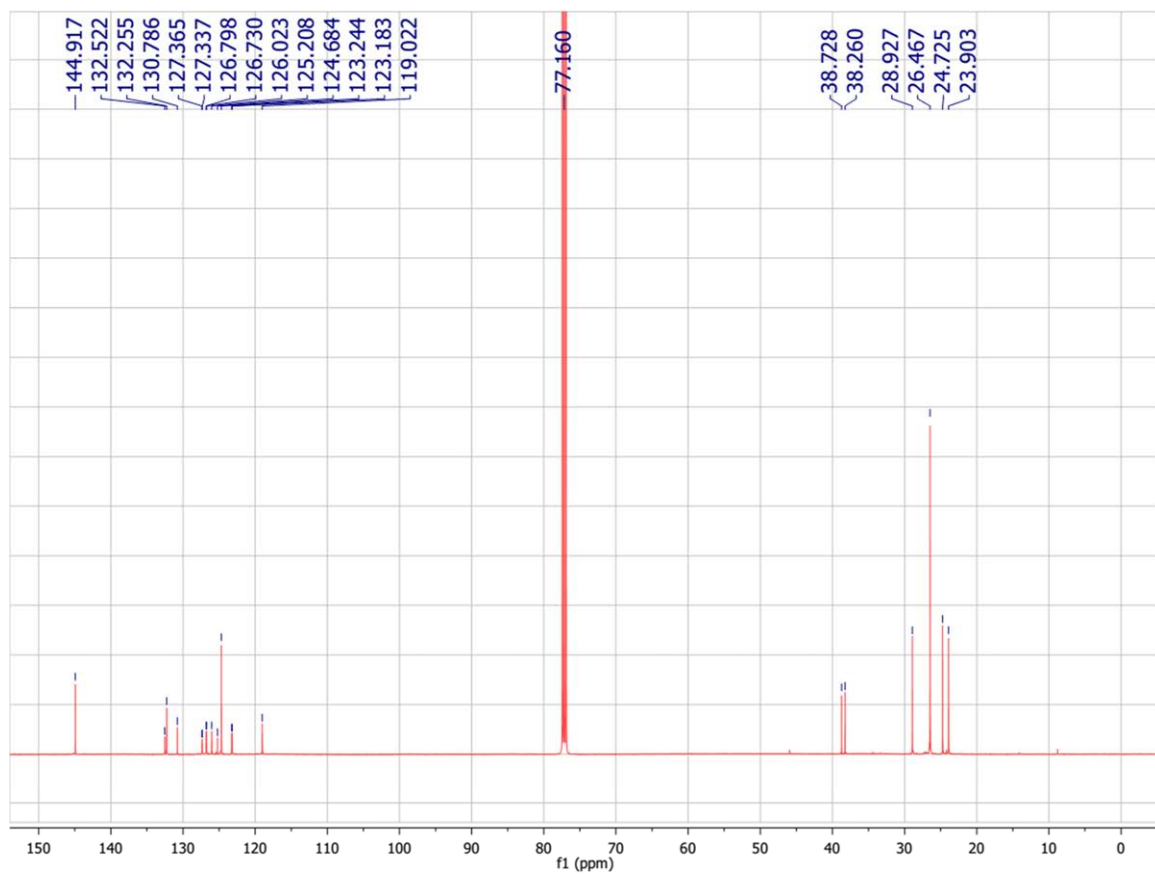

**Figure S3:**  $^{13}\text{C}$  NMR (126 Hz,  $\text{CDCl}_3$ ) spectrum of ligand precursor **L1**.

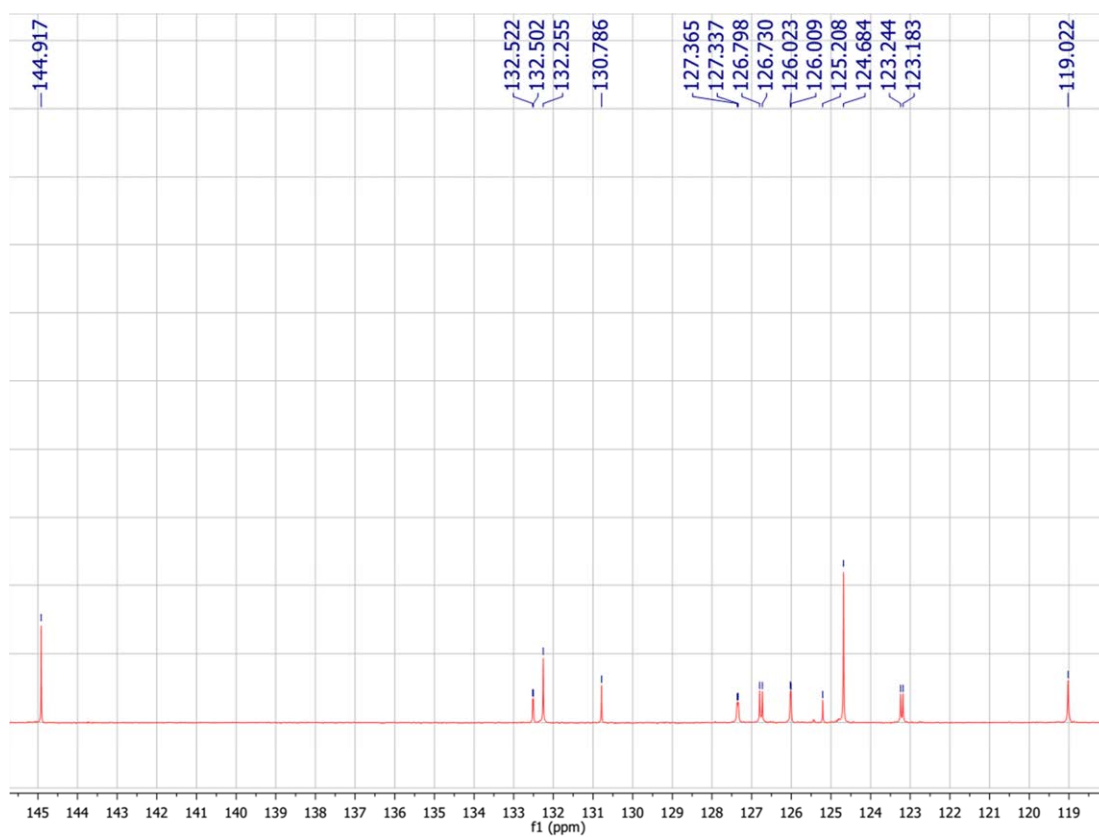

**Figure S4:**  $^{13}\text{C}$  NMR (126 Hz,  $\text{CDCl}_3$ ) spectrum (118–146 ppm) of ligand precursor **L1**.

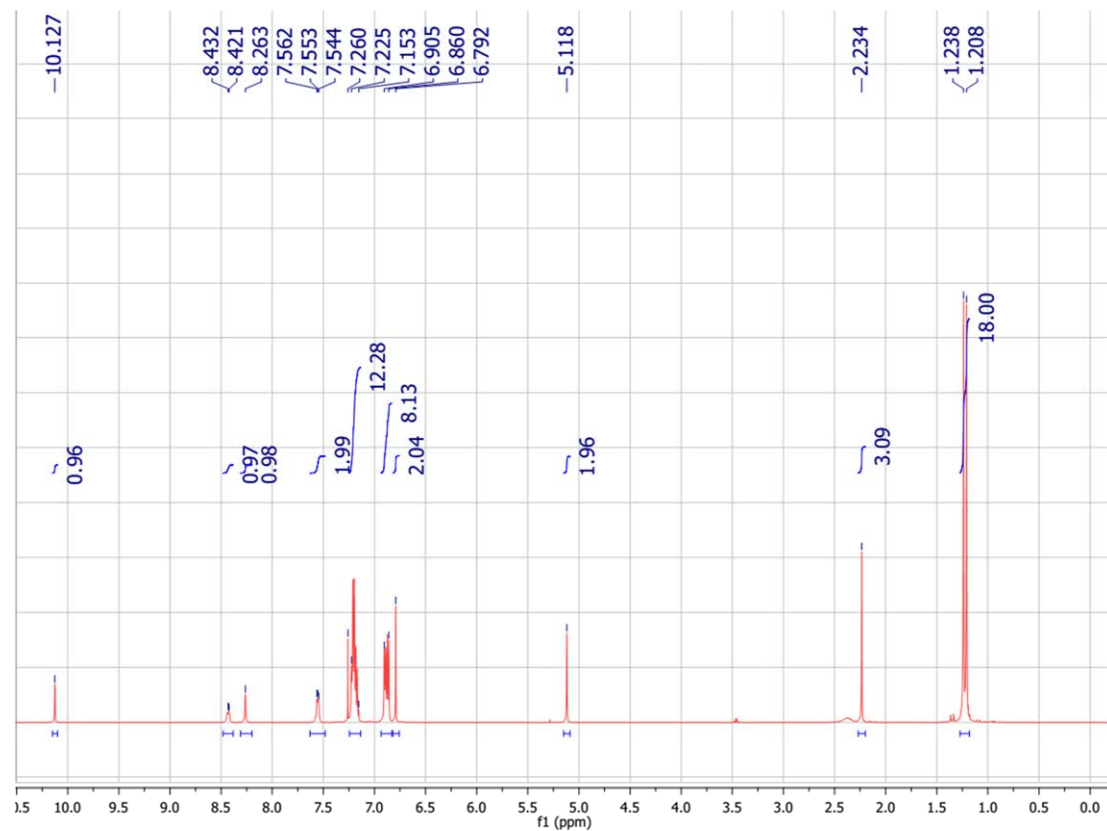

**Figure S5:** <sup>1</sup>H NMR (500 Hz, CDCl<sub>3</sub>) spectrum of ligand precursor **L2**.

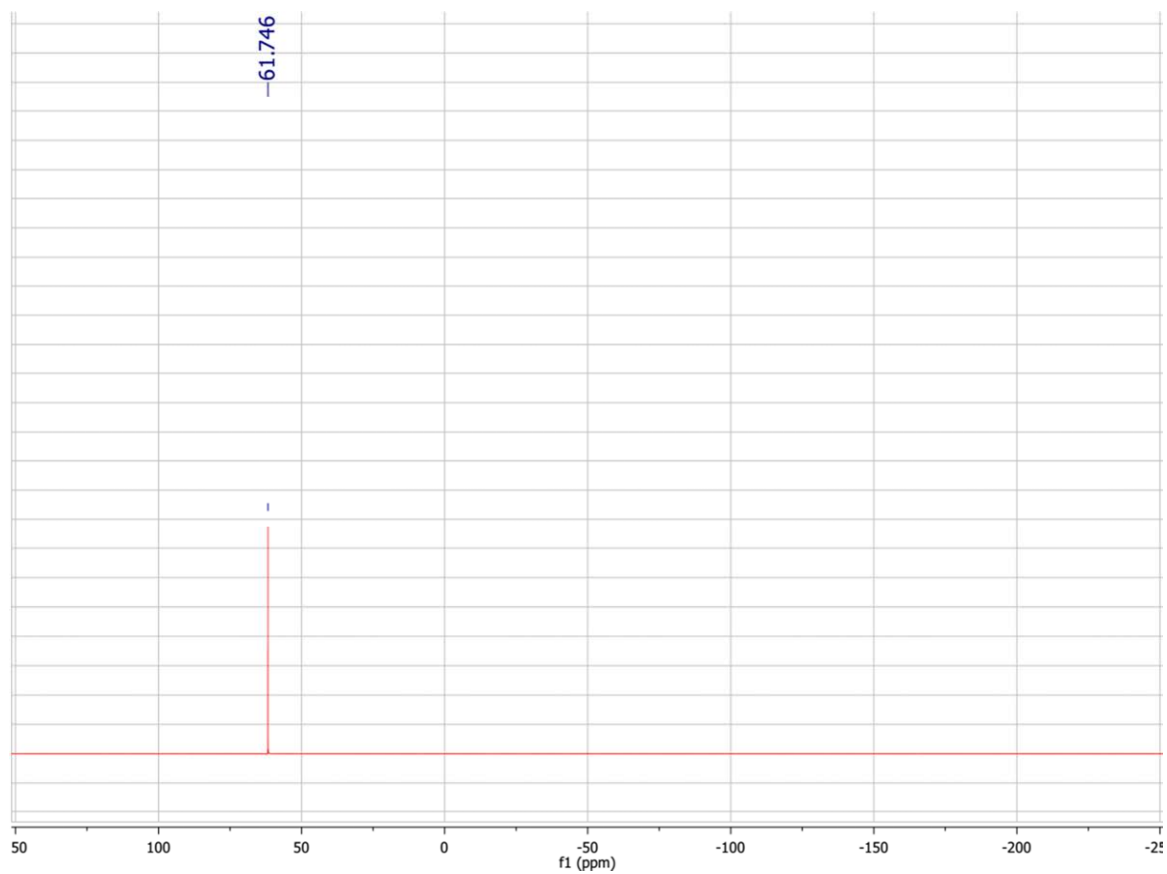

**Figure S6:** <sup>31</sup>P NMR (202 Hz, CDCl<sub>3</sub>) spectrum of ligand precursor **L2**.

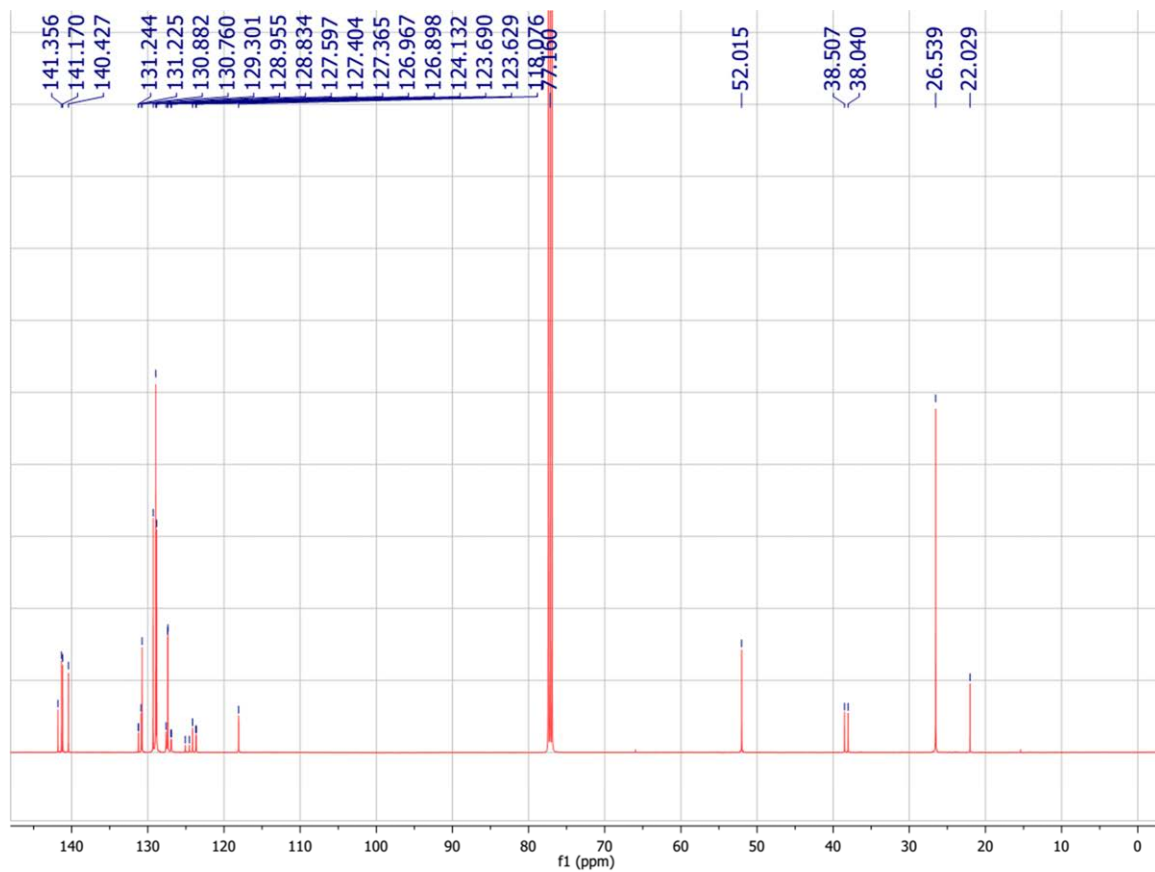

**Figure S7:**  $^{13}\text{C}$  NMR (126 Hz,  $\text{CDCl}_3$ ) spectrum of ligand precursor **L2**.

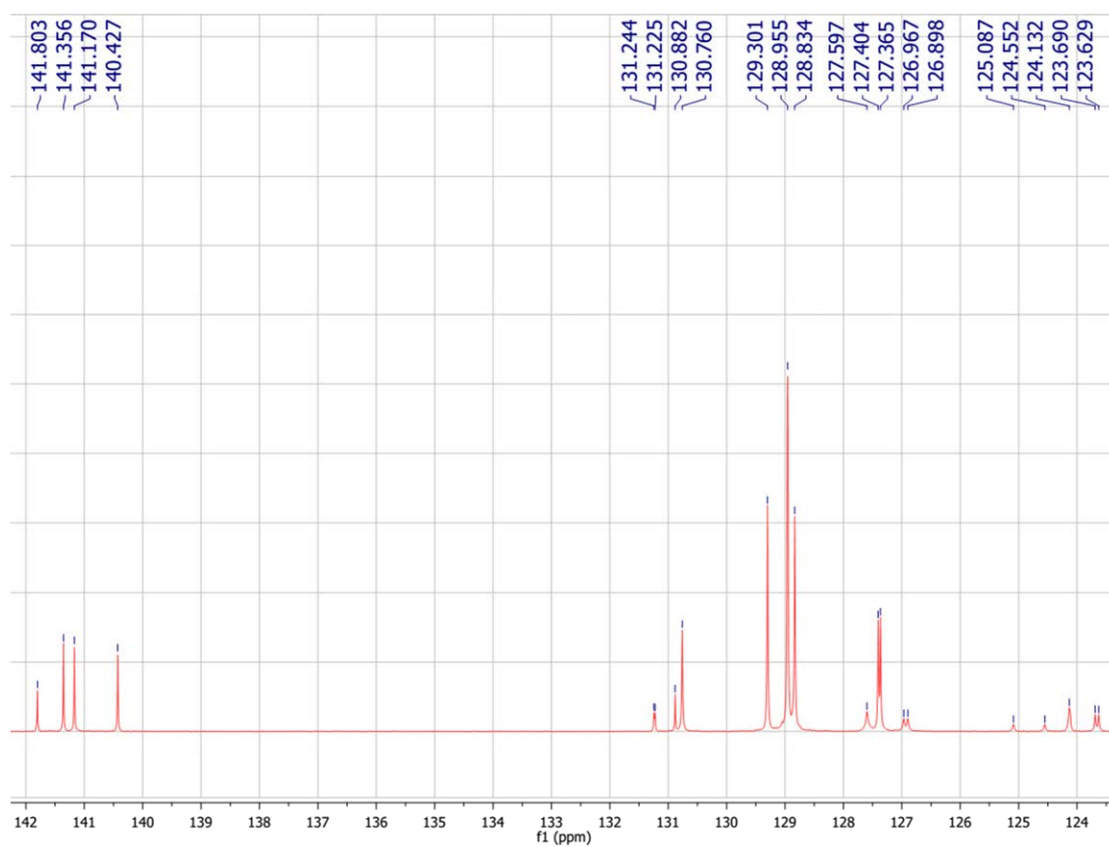

**Figure S8:**  $^{13}\text{C}$  NMR (126 Hz,  $\text{CDCl}_3$ ) spectrum (120–145 ppm) of ligand precursor **L2**.



### 3.2 Complexes 4a, 4b, 4c and 5a, 5b

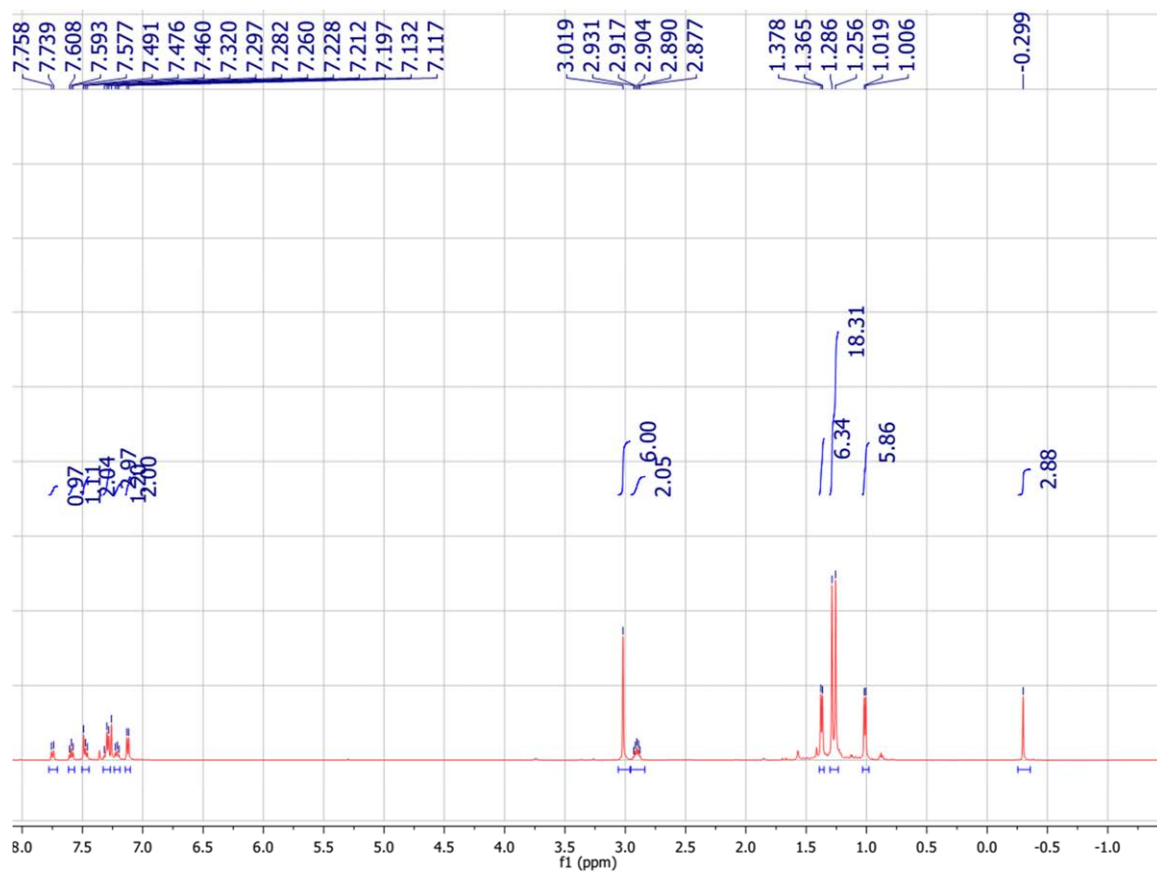

Figure S9: <sup>1</sup>H NMR (500 Hz, CDCl<sub>3</sub>) spectrum of complex 4a.

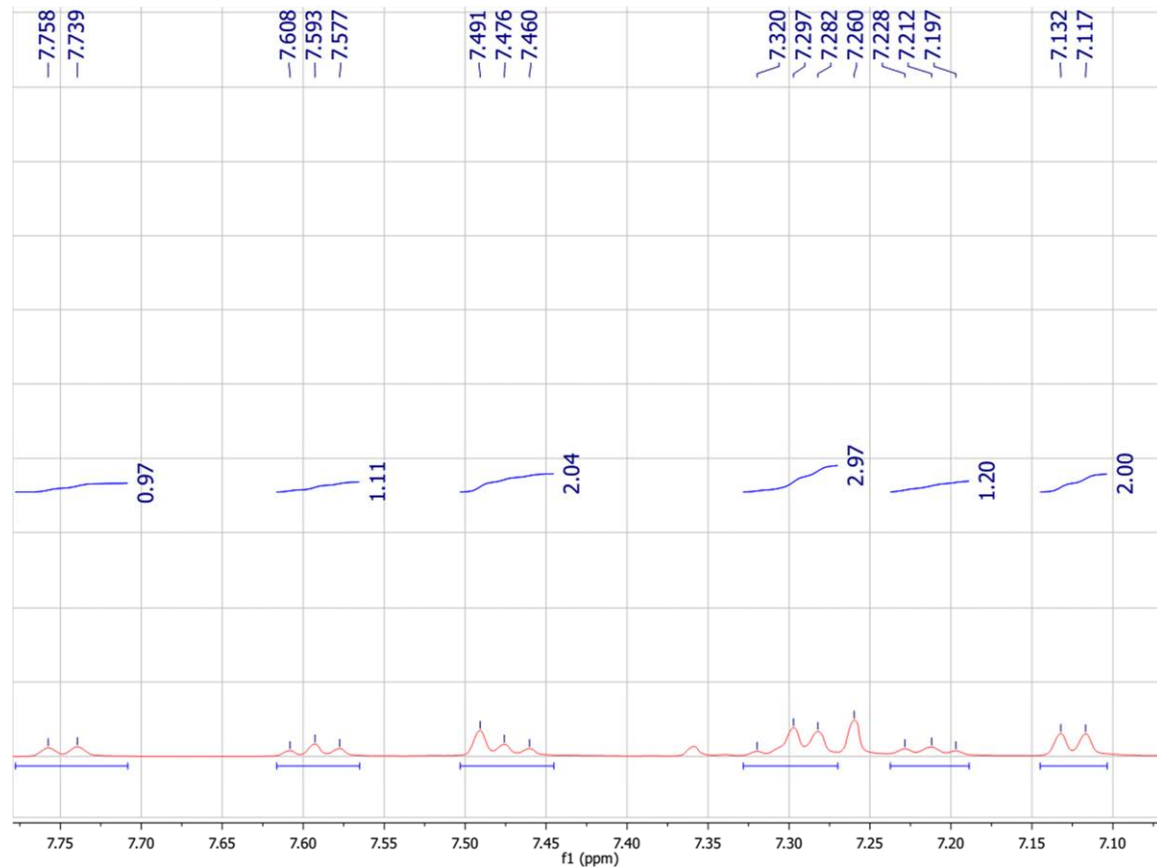

Figure S10: <sup>1</sup>H NMR (500 Hz, CDCl<sub>3</sub>) spectrum (7.10–7.80 ppm) of complex 4a.

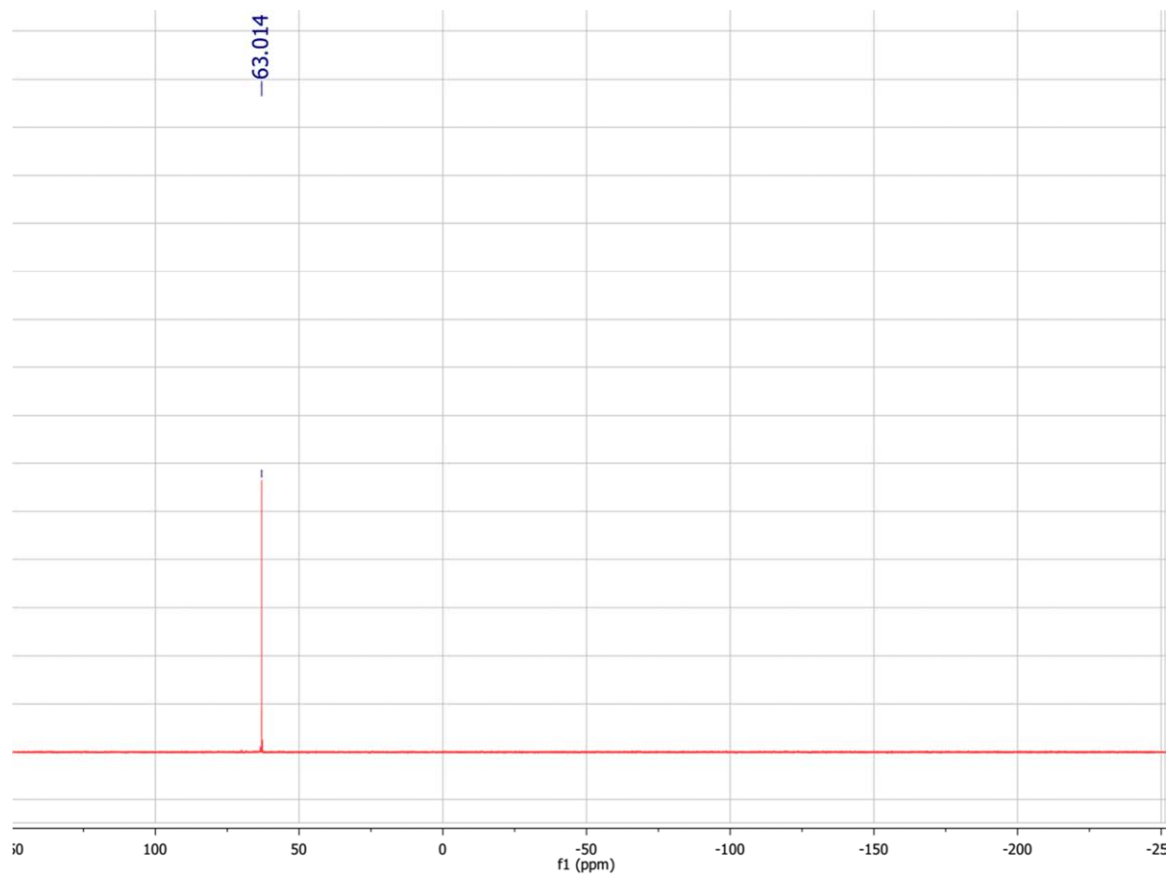

**Figure S11:**  $^{31}\text{P}$  NMR (202 Hz,  $\text{CDCl}_3$ ) spectrum of complex **4a**.

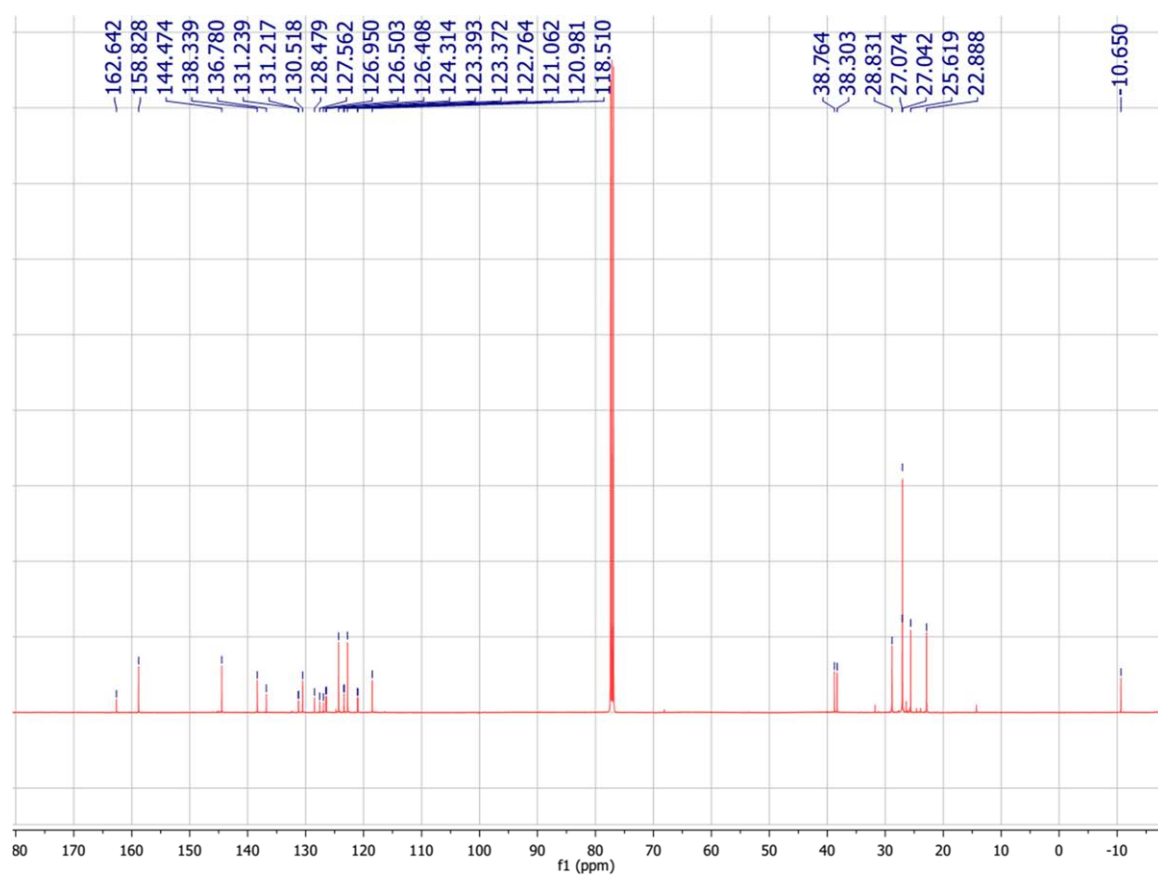

**Figure S12:**  $^{13}\text{C}$  NMR (126 Hz,  $\text{CDCl}_3$ ) spectrum of complex **4a**.

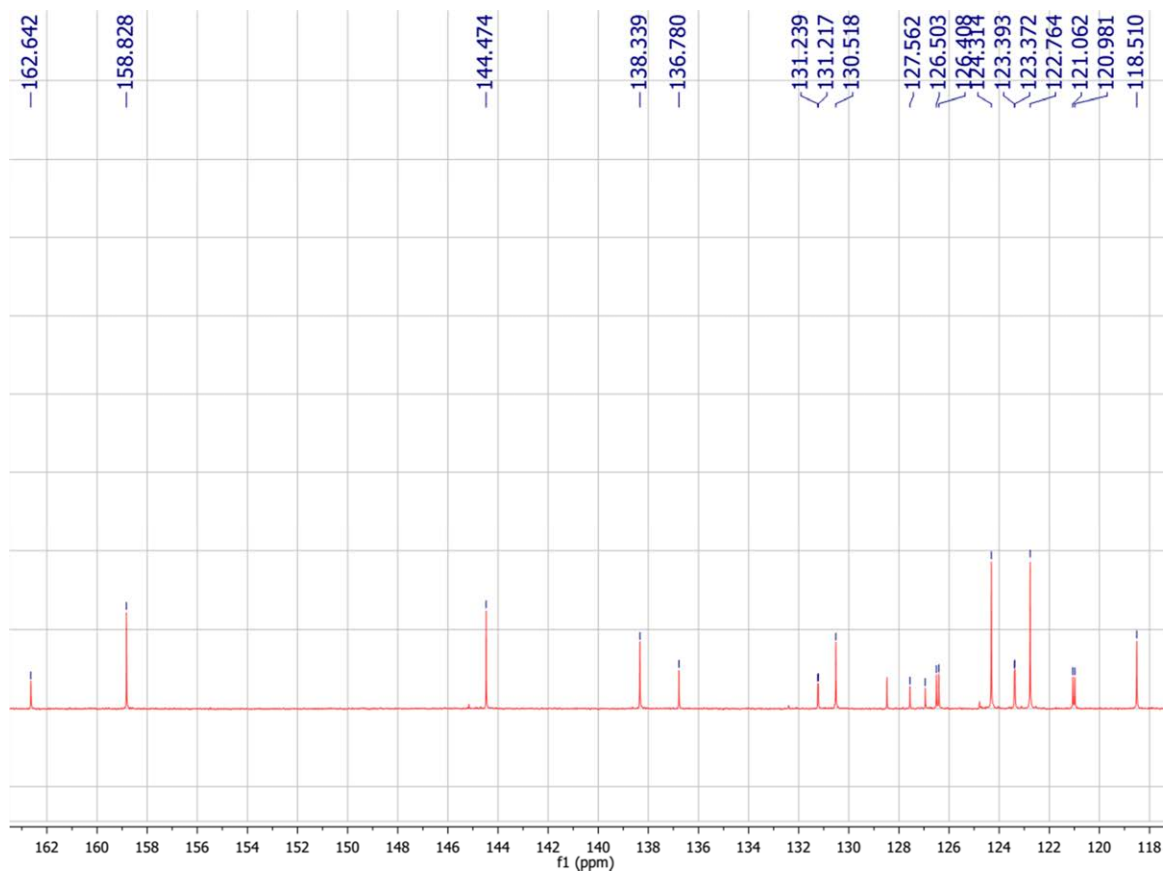

**Figure S13:** <sup>13</sup>C NMR (126 Hz, CDCl<sub>3</sub>) spectrum (118–164 ppm) of complex **4a**.

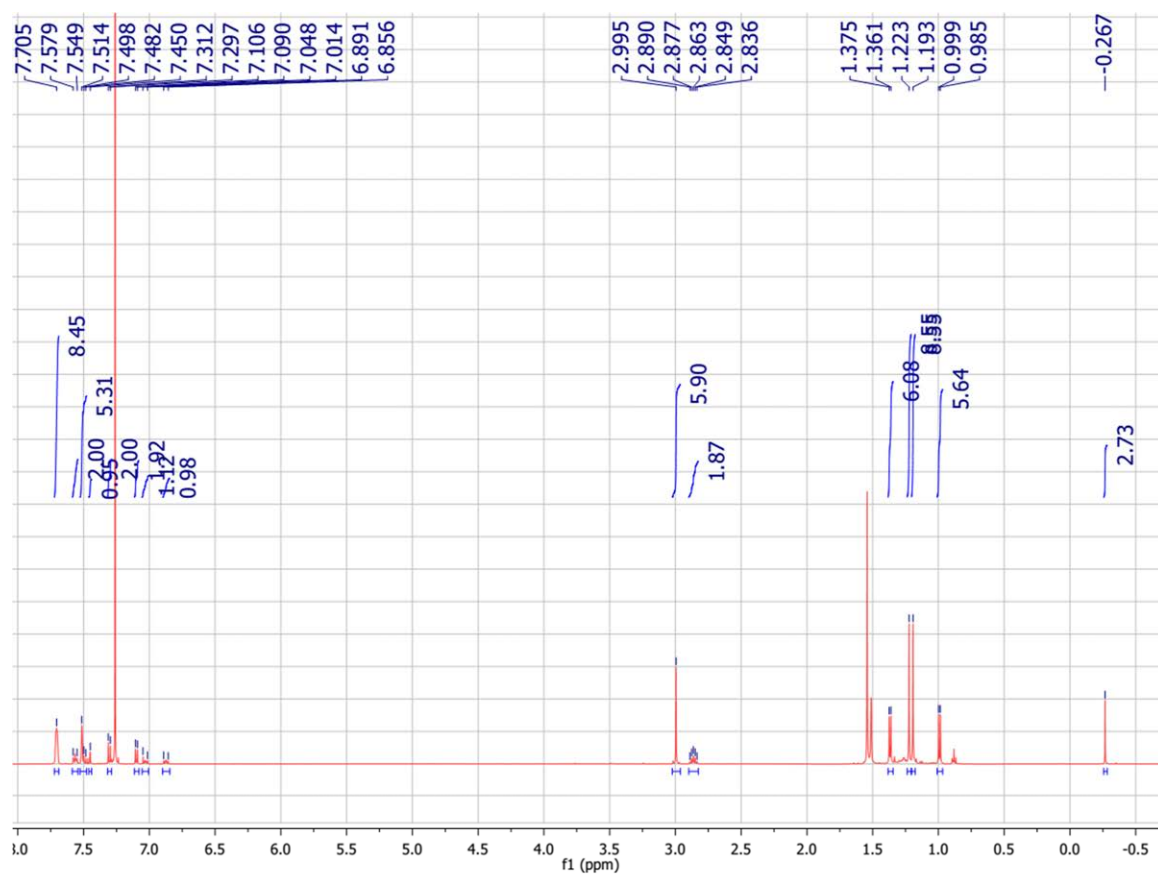

**Figure S14:** <sup>1</sup>H NMR (500 Hz, CDCl<sub>3</sub>) spectrum of complex **4b**.

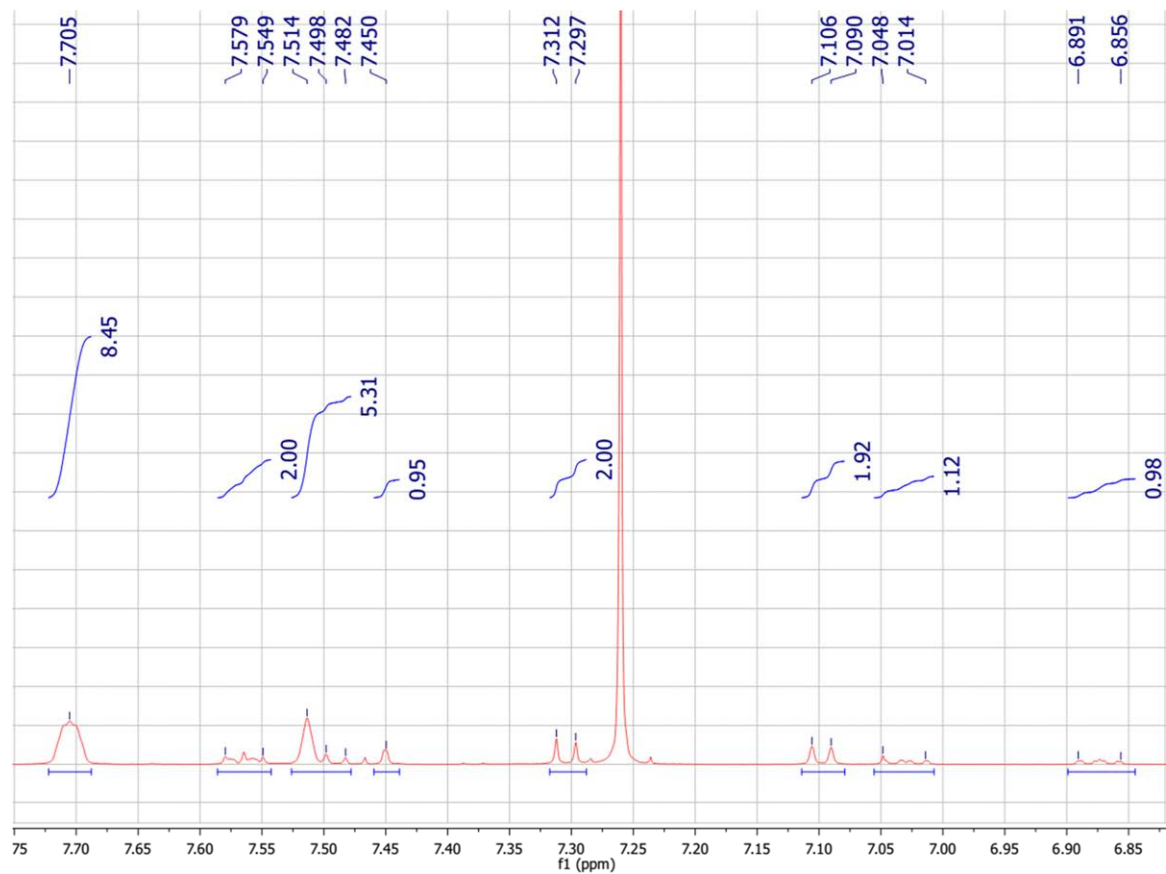

**Figure S15:** <sup>1</sup>H NMR (500 Hz, CDCl<sub>3</sub>) spectrum (6.80–7.75 ppm) of complex **4b**.

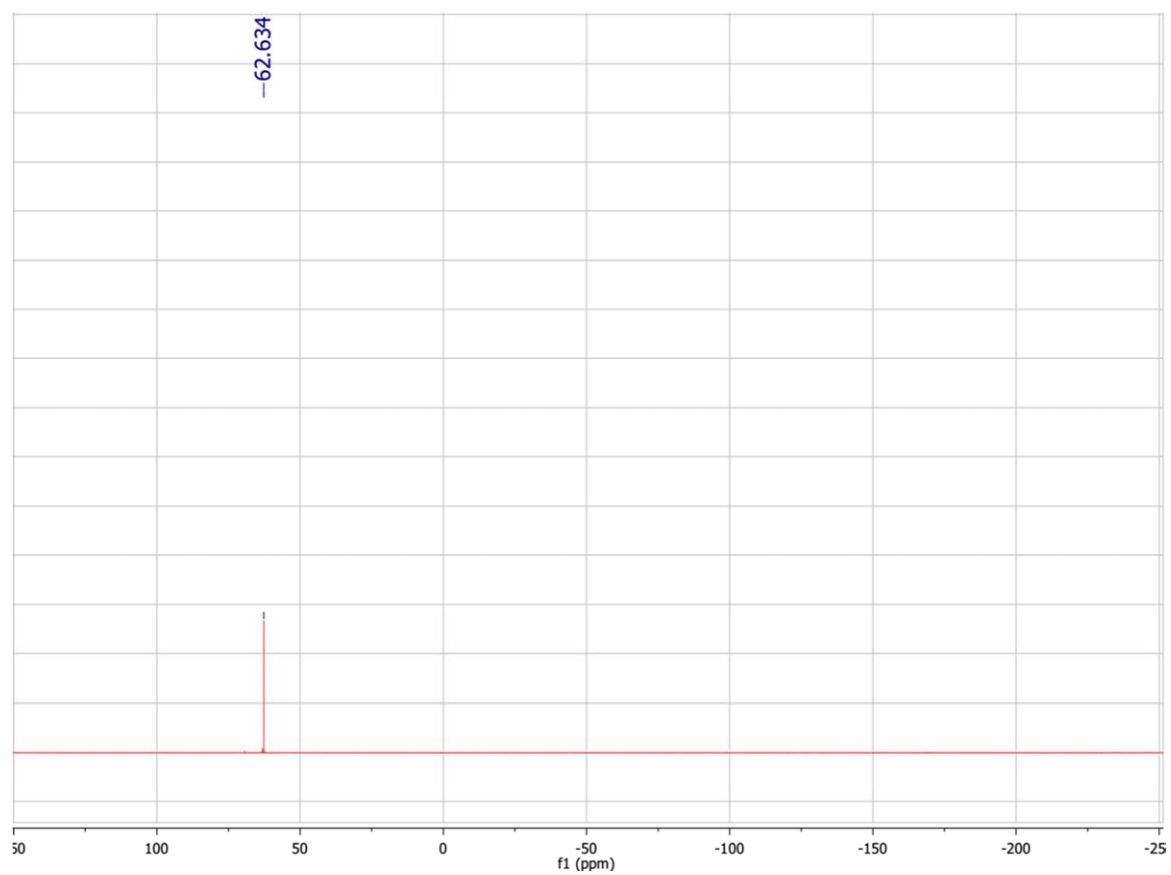

**Figure S16:** <sup>31</sup>P NMR (202 Hz, CDCl<sub>3</sub>) spectrum of complex **4b**.

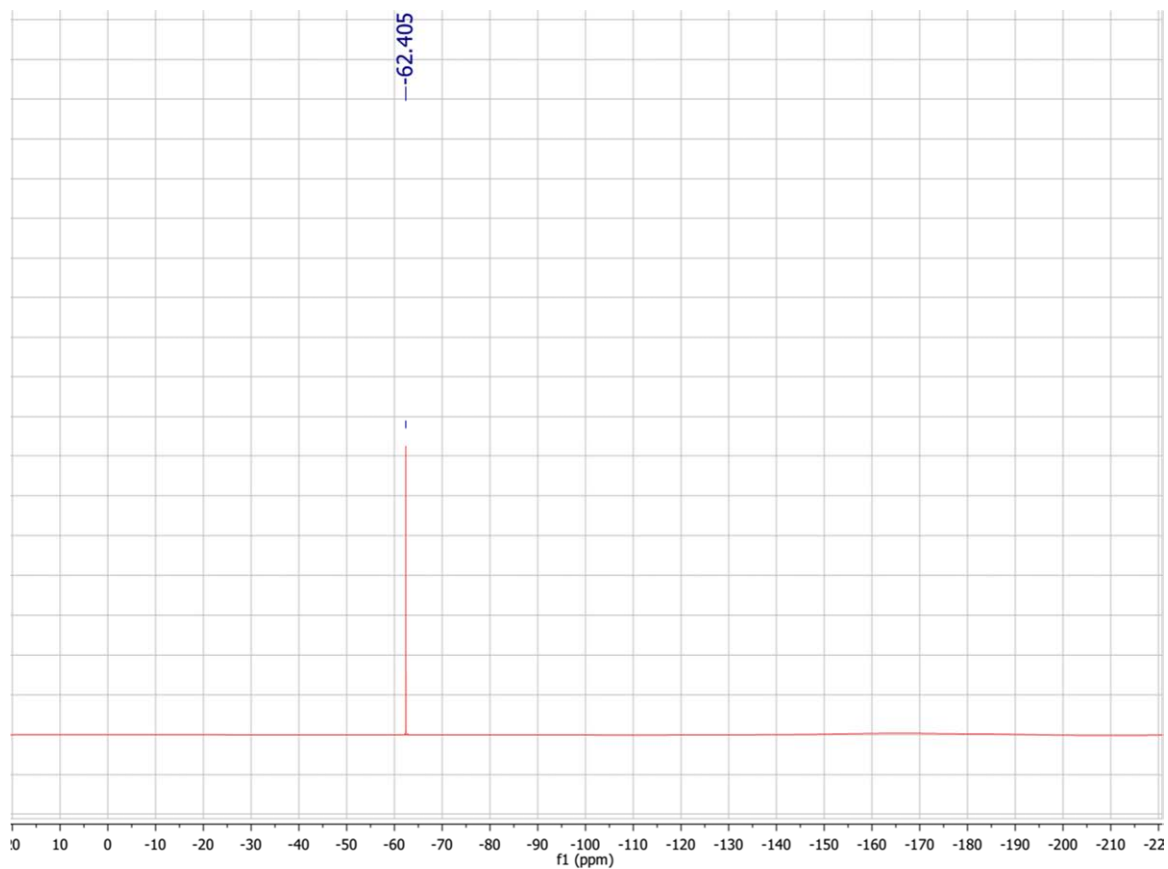

**Figure S17:**  $^{19}\text{F}$  NMR (470 Hz,  $\text{CDCl}_3$ ) spectrum of complex **4b**.

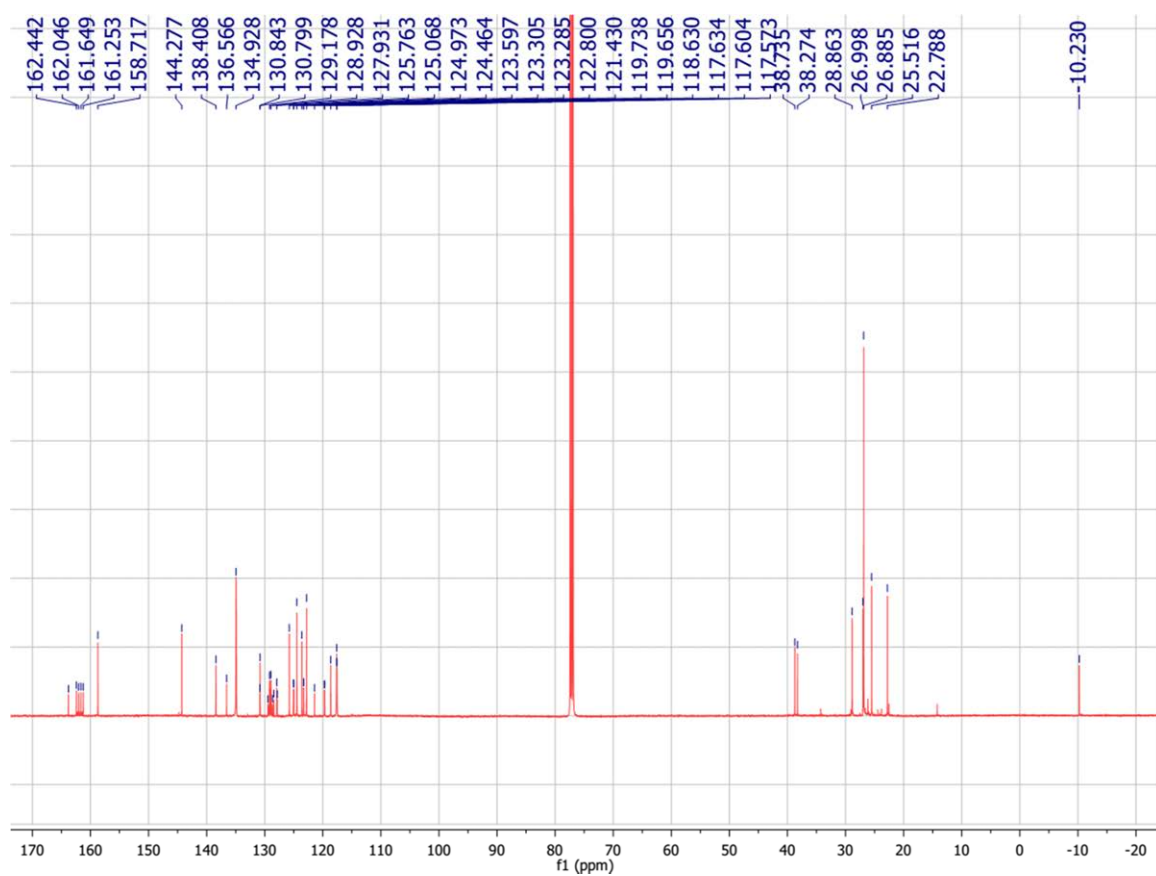

**Figure S18:**  $^{13}\text{C}$  NMR (126 Hz,  $\text{CDCl}_3$ ) spectrum of complex **4b**.

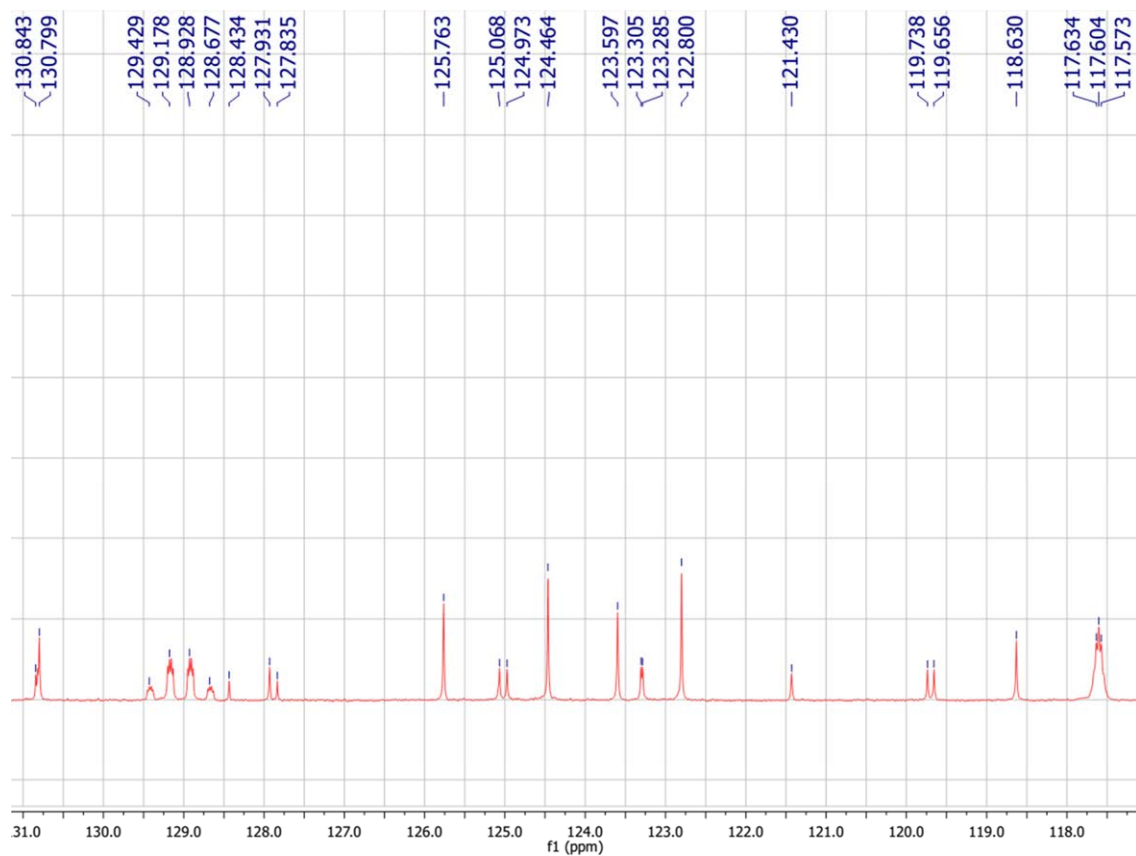

**Figure S19:** <sup>13</sup>C NMR (126 Hz, CDCl<sub>3</sub>) spectrum (116–131 ppm) of complex 4b.

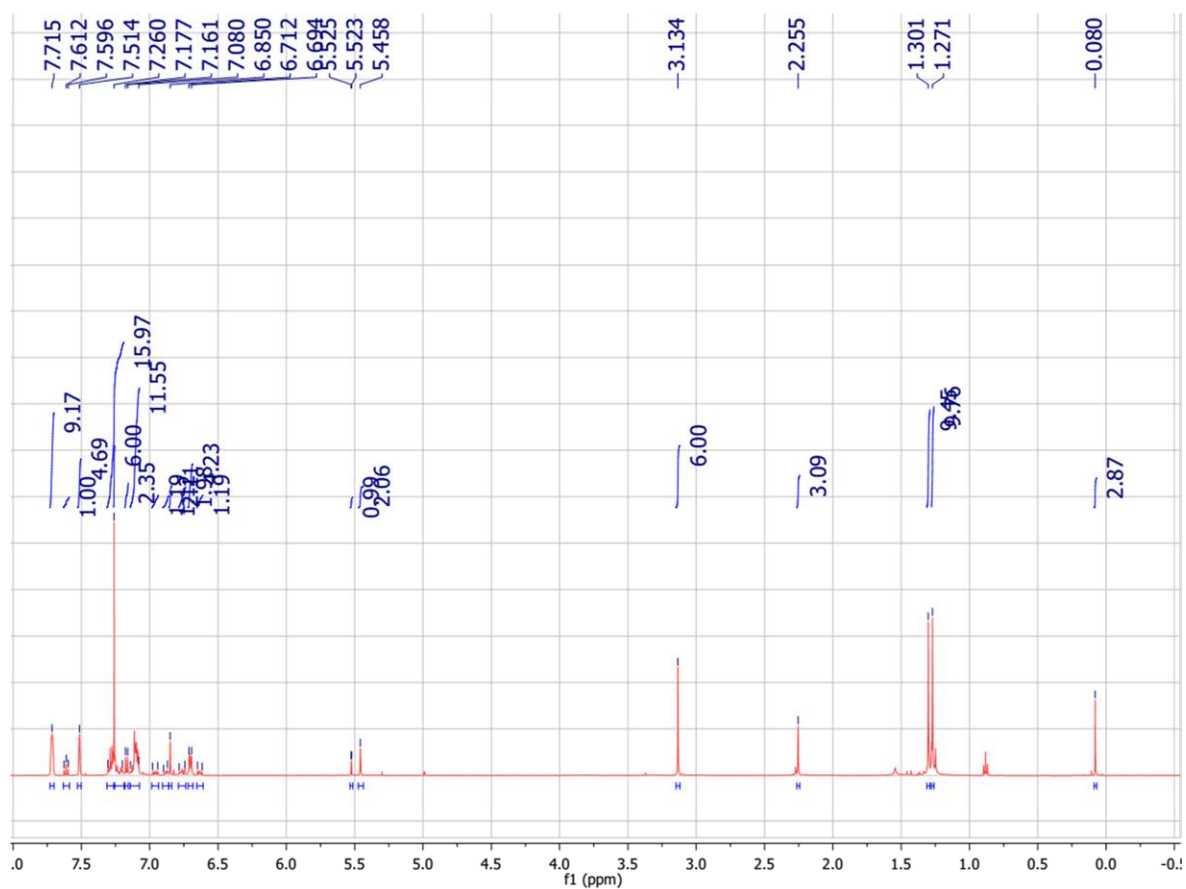

**Figure S20:** <sup>1</sup>H NMR (500 Hz, CDCl<sub>3</sub>) spectrum of complex 4c.

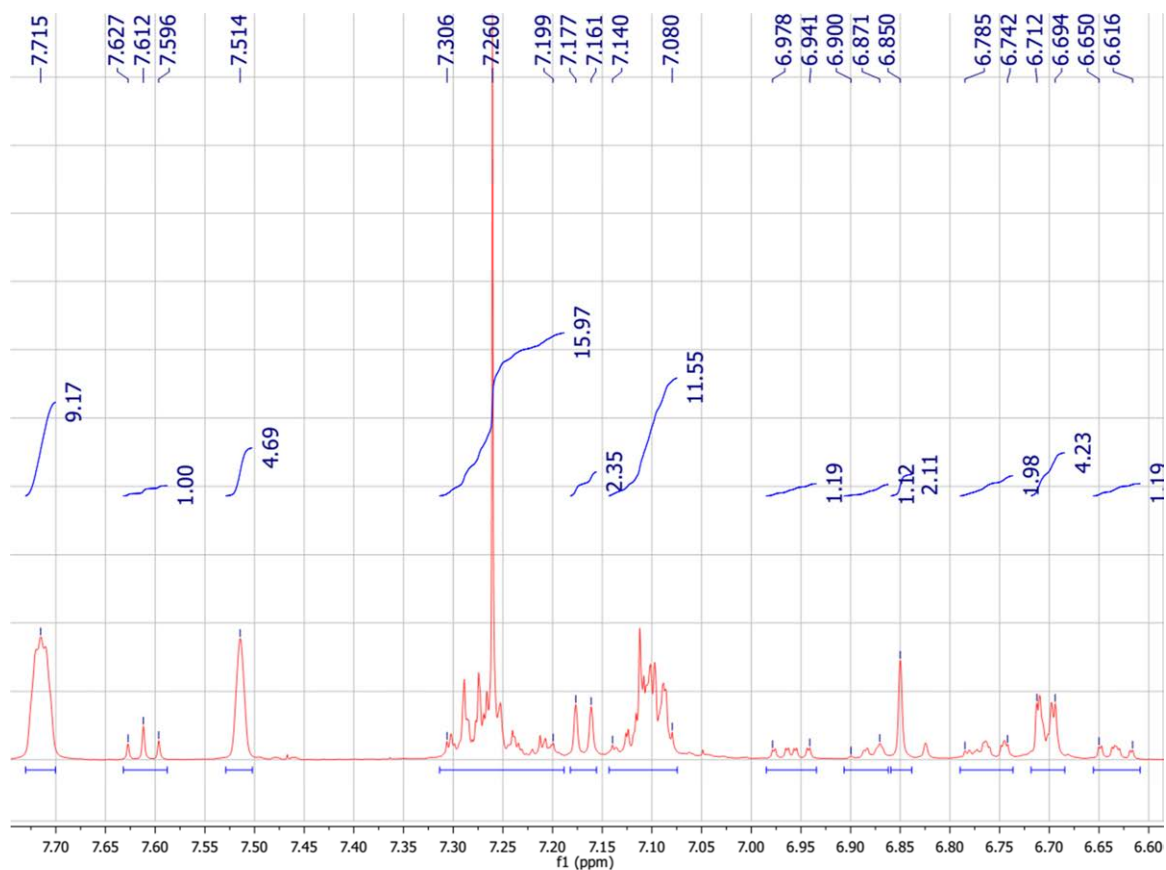

**Figure S21:** <sup>1</sup>H NMR (500 Hz, CDCl<sub>3</sub>) spectrum (6.60–7.80 ppm) of complex **4c**.

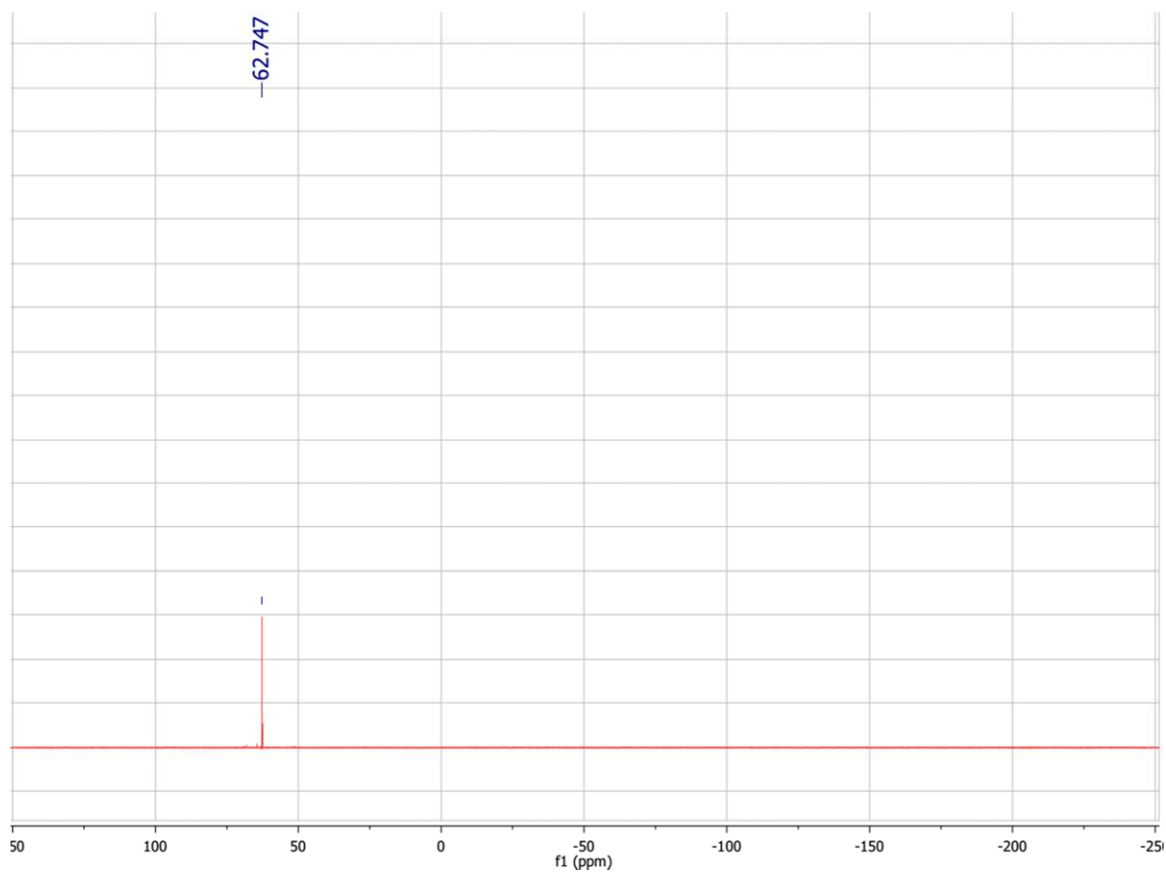

**Figure S22:** <sup>31</sup>P NMR (202 Hz, CDCl<sub>3</sub>) spectrum of complex **4c**.

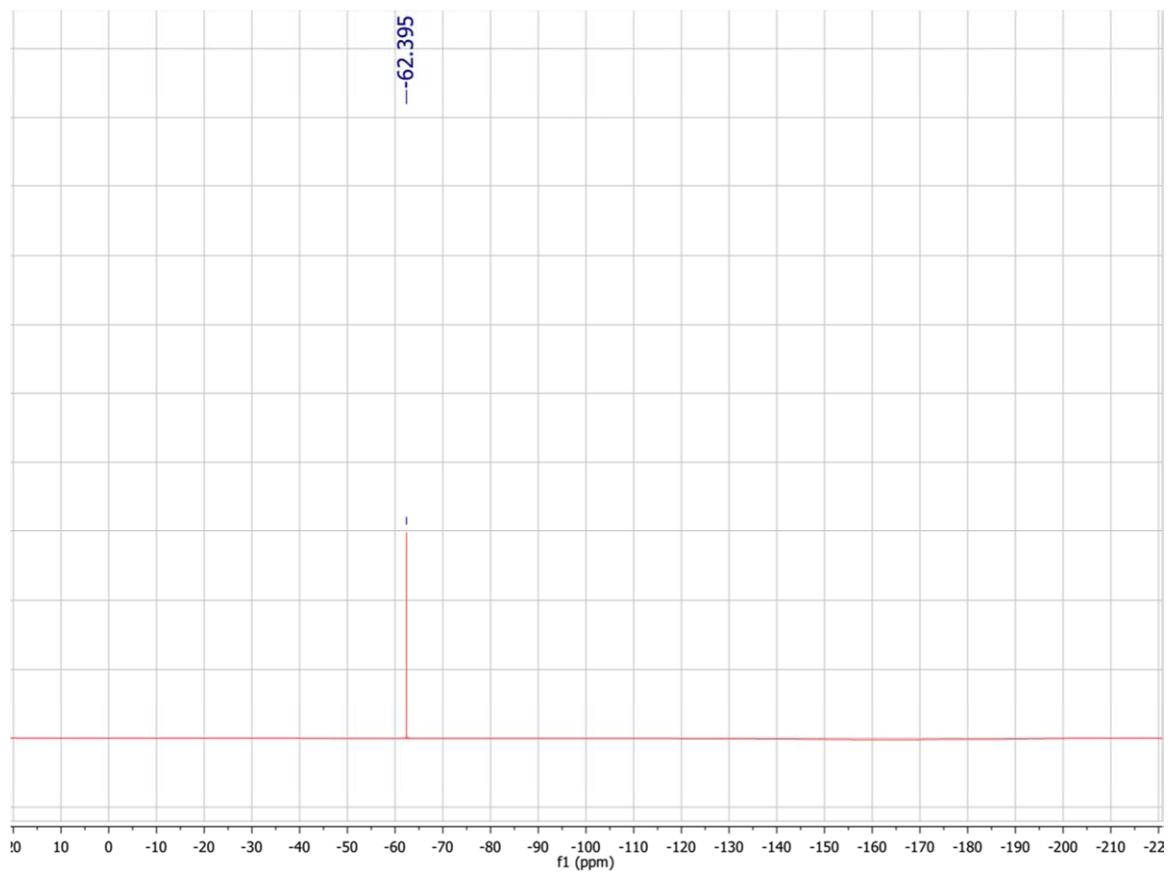

**Figure S23:**  $^{19}\text{F}$  NMR (470 Hz,  $\text{CDCl}_3$ ) spectrum of complex 4c.

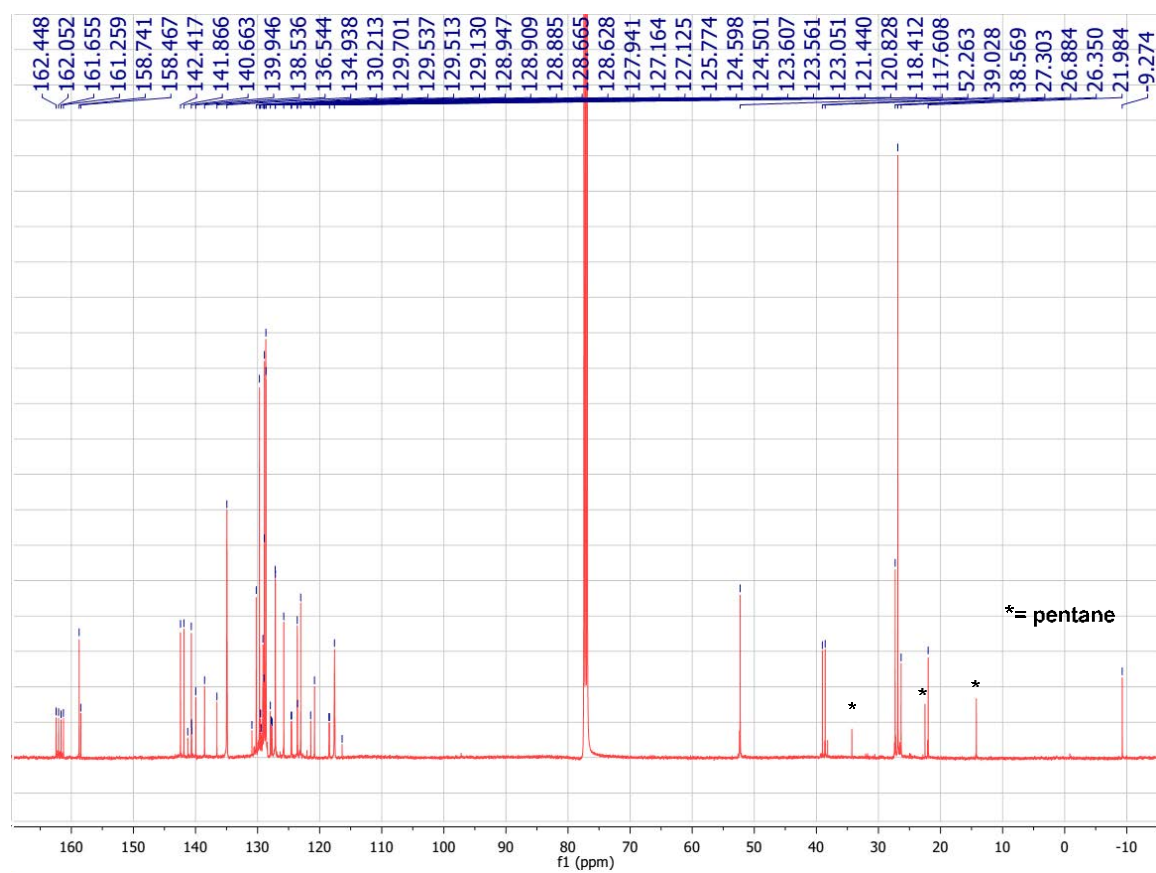

**Figure S24:**  $^{13}\text{C}$  NMR (126 Hz,  $\text{CDCl}_3$ ) spectrum of complex 4c.



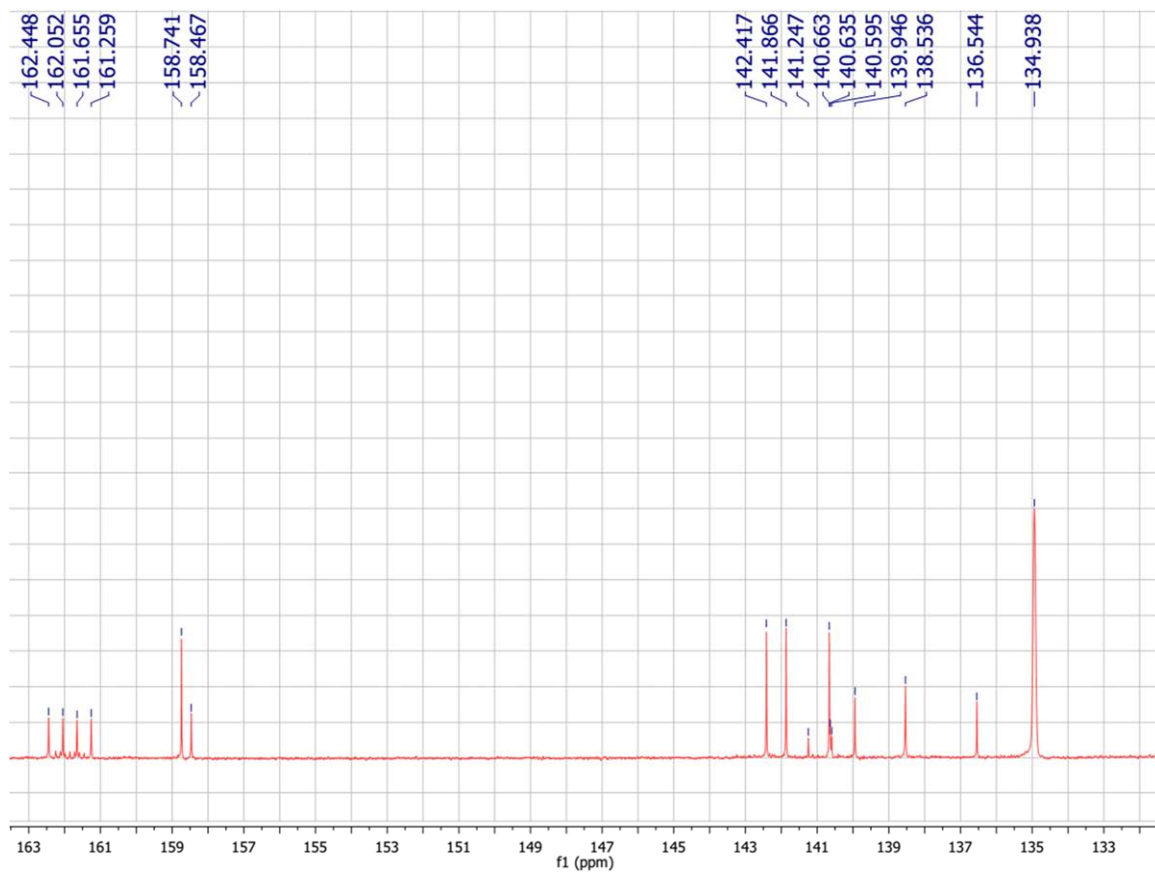

**Figure S25:**  $^{13}\text{C}$  NMR (126 Hz,  $\text{CDCl}_3$ ) spectrum ( $\delta$  133–163 ppm) of complex **4c**.

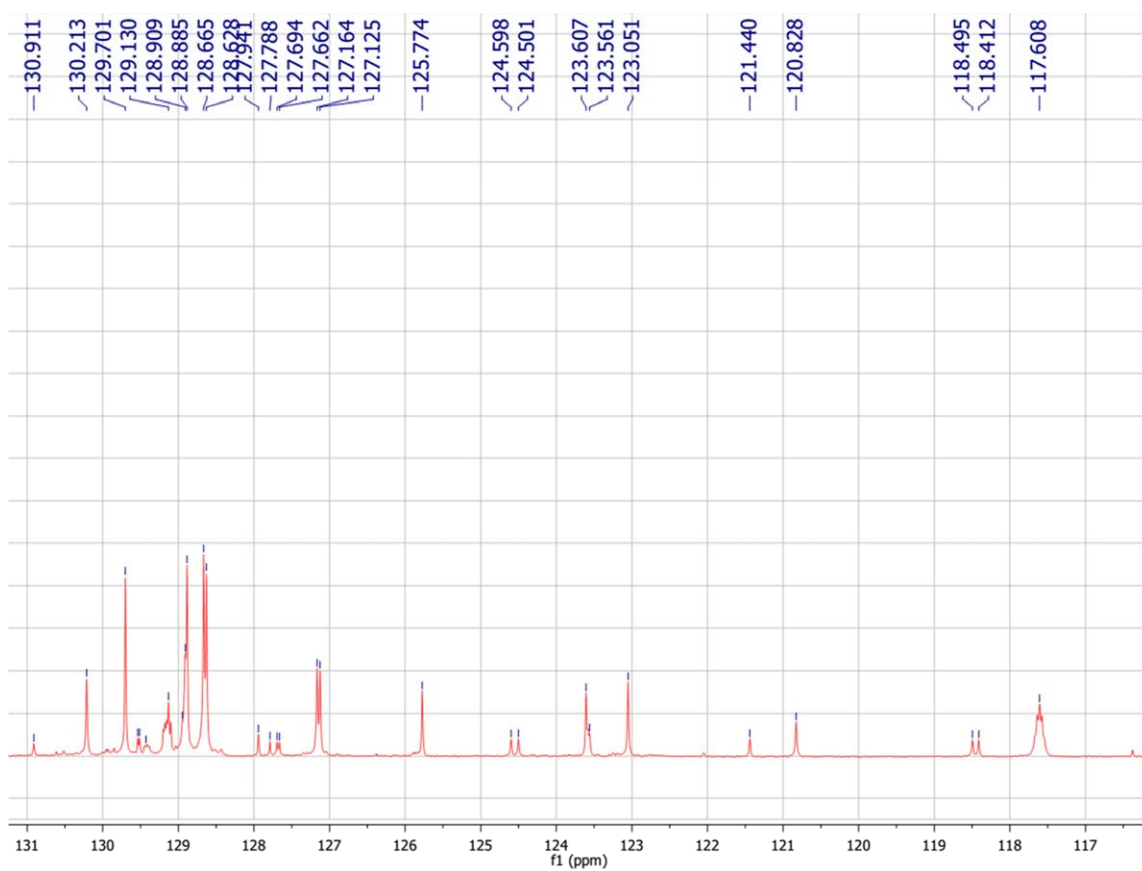

**Figure S26:**  $^{13}\text{C}$  NMR (126 Hz,  $\text{CDCl}_3$ ) spectrum ( $\delta$  117–131 ppm) of complex **4c**.

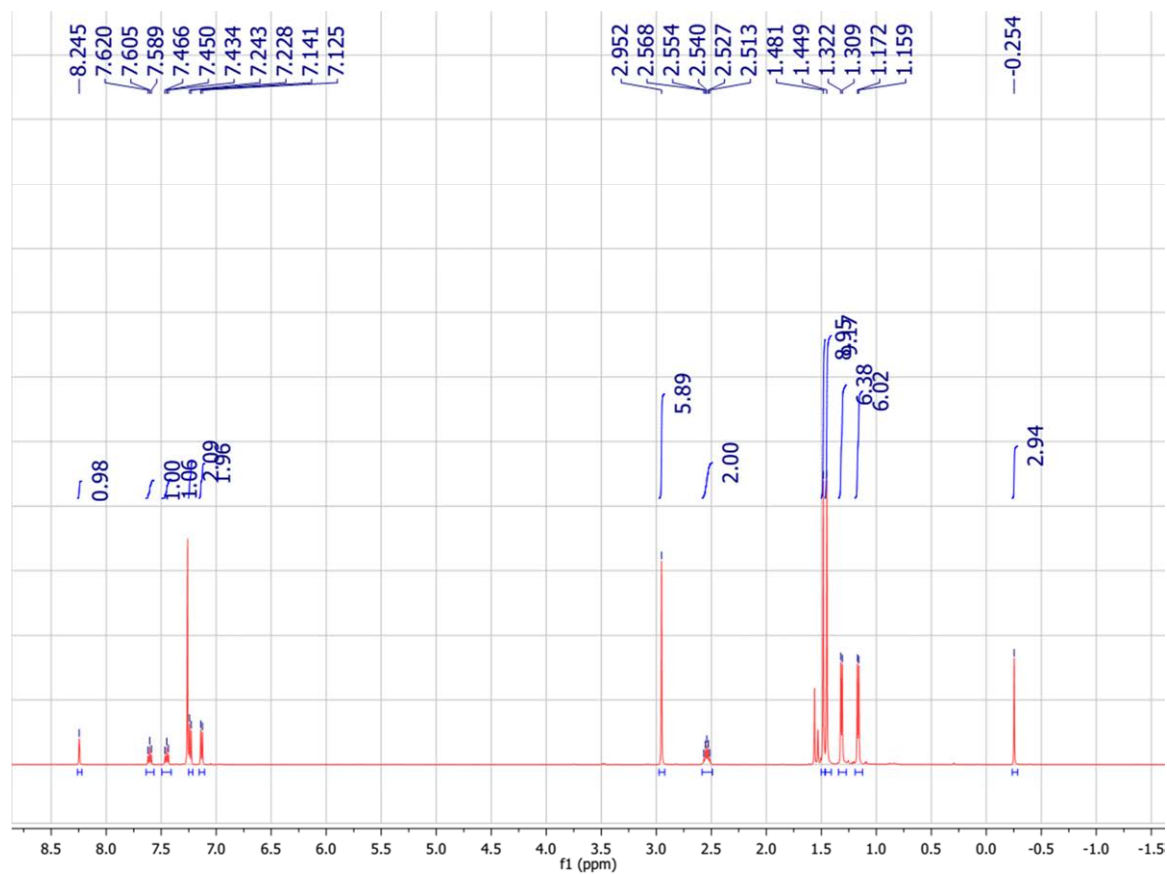

**Figure S27:** <sup>1</sup>H NMR (500 Hz, CDCl<sub>3</sub>) spectrum of complex **5a**.

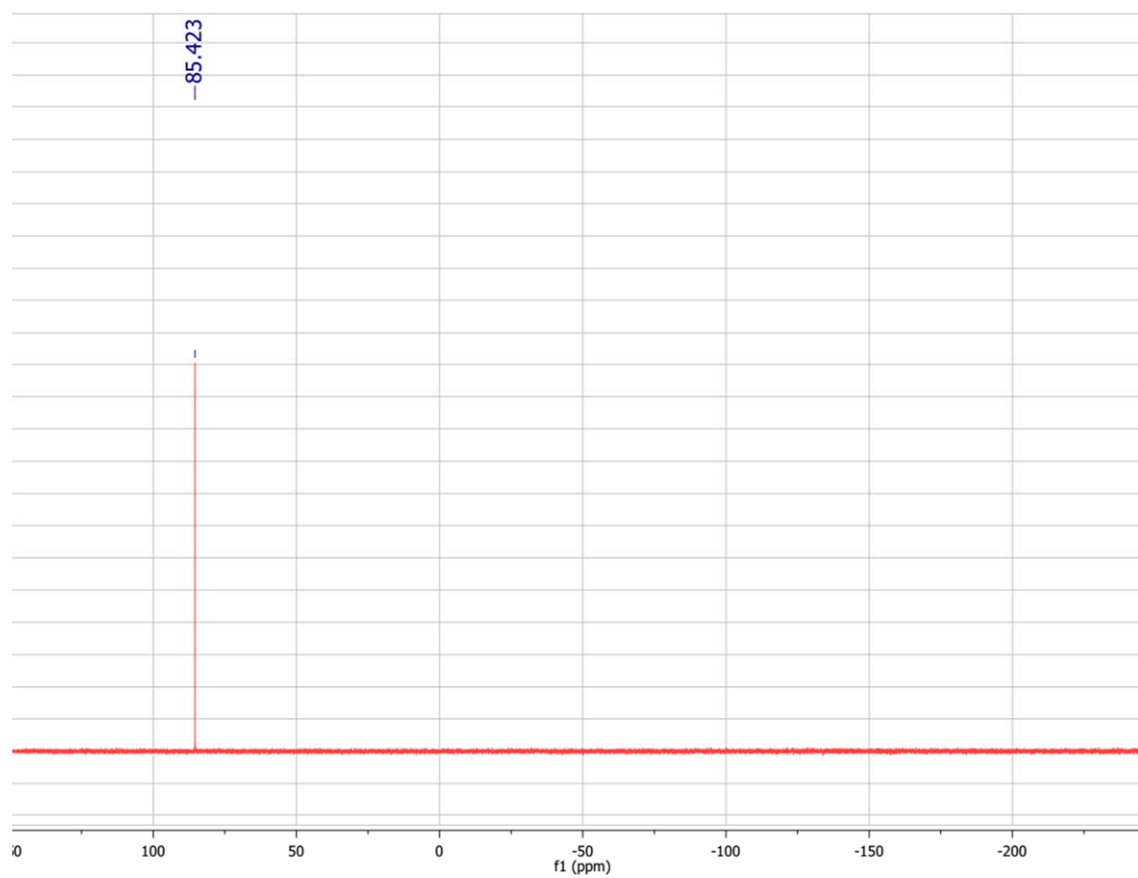

**Figure S28:** <sup>31</sup>P NMR (202 Hz, CDCl<sub>3</sub>) spectrum of complex **5a**.

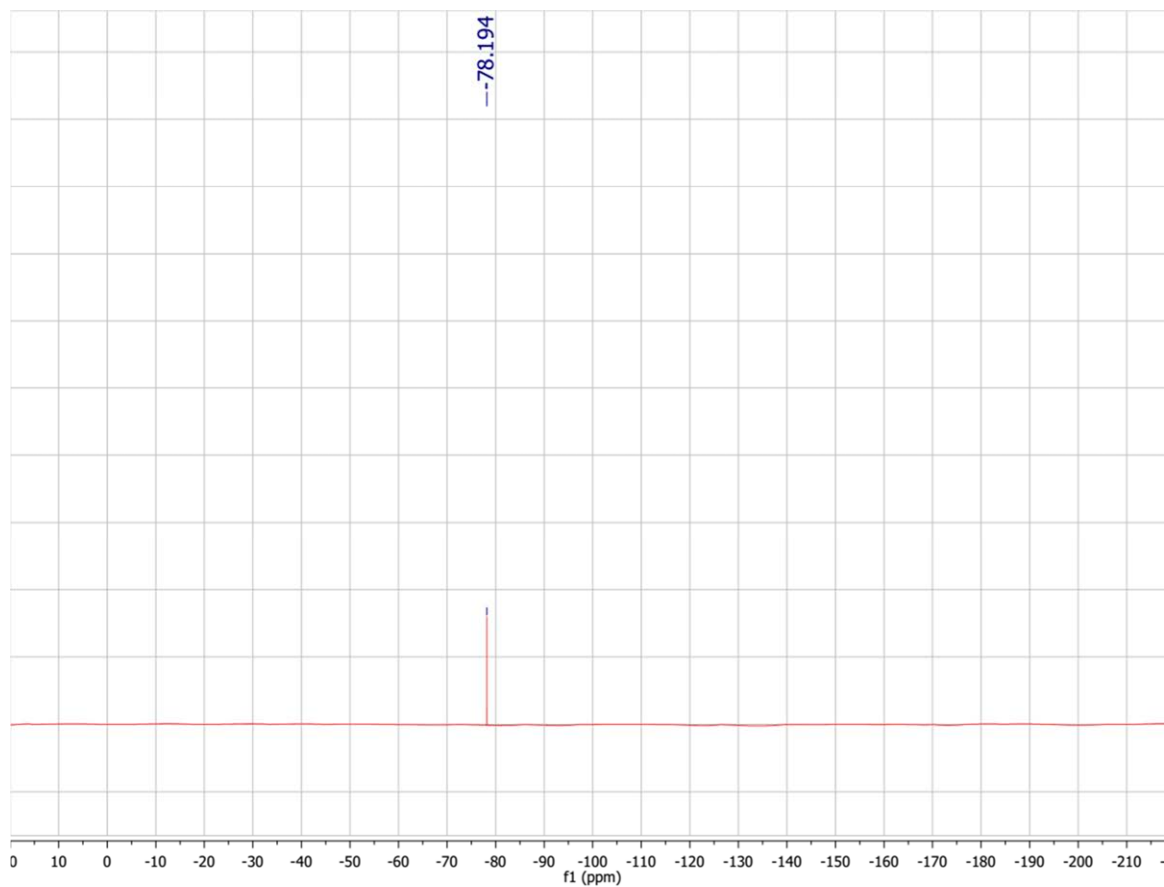

Figure S29:  $^{19}\text{F}$  NMR (470 Hz,  $\text{CDCl}_3$ ) spectrum of complex **5a**.

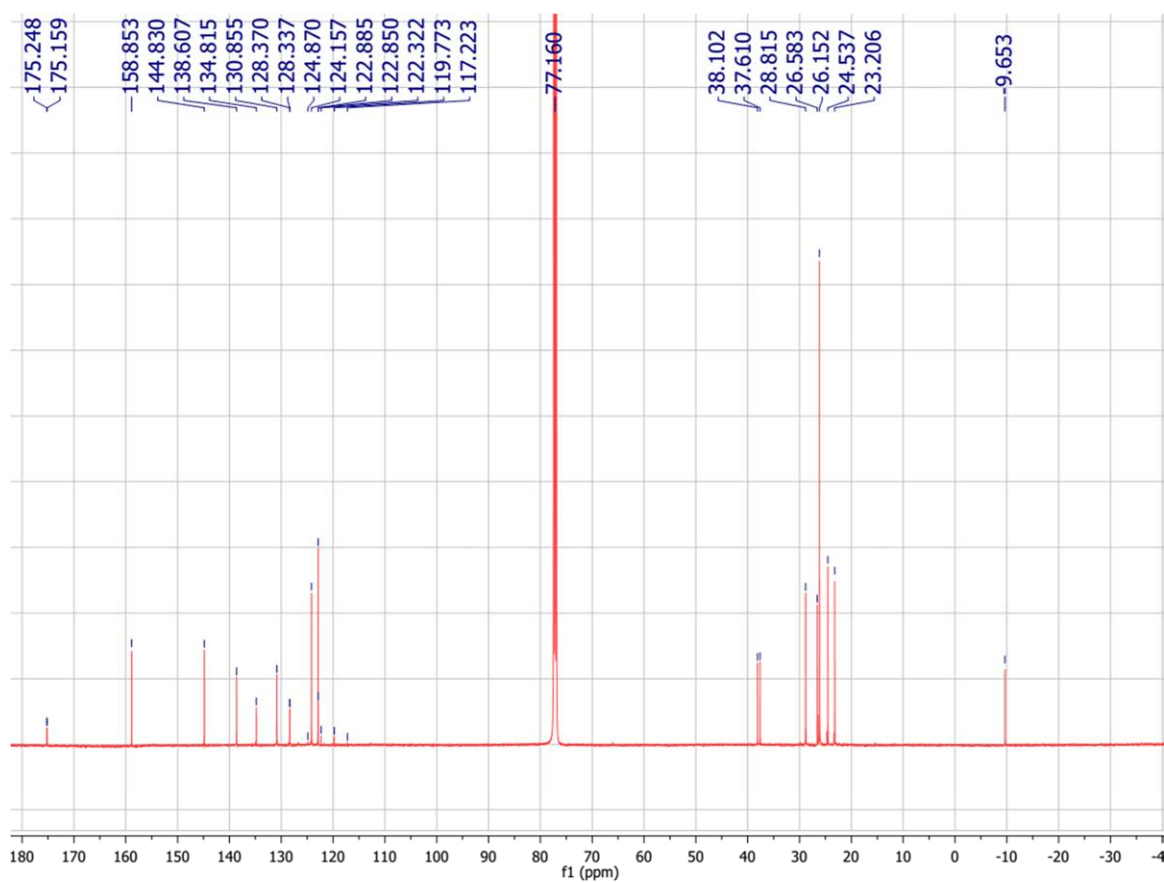

Figure S30:  $^{13}\text{C}$  NMR (126 Hz,  $\text{CDCl}_3$ ) spectrum of complex **5a**.

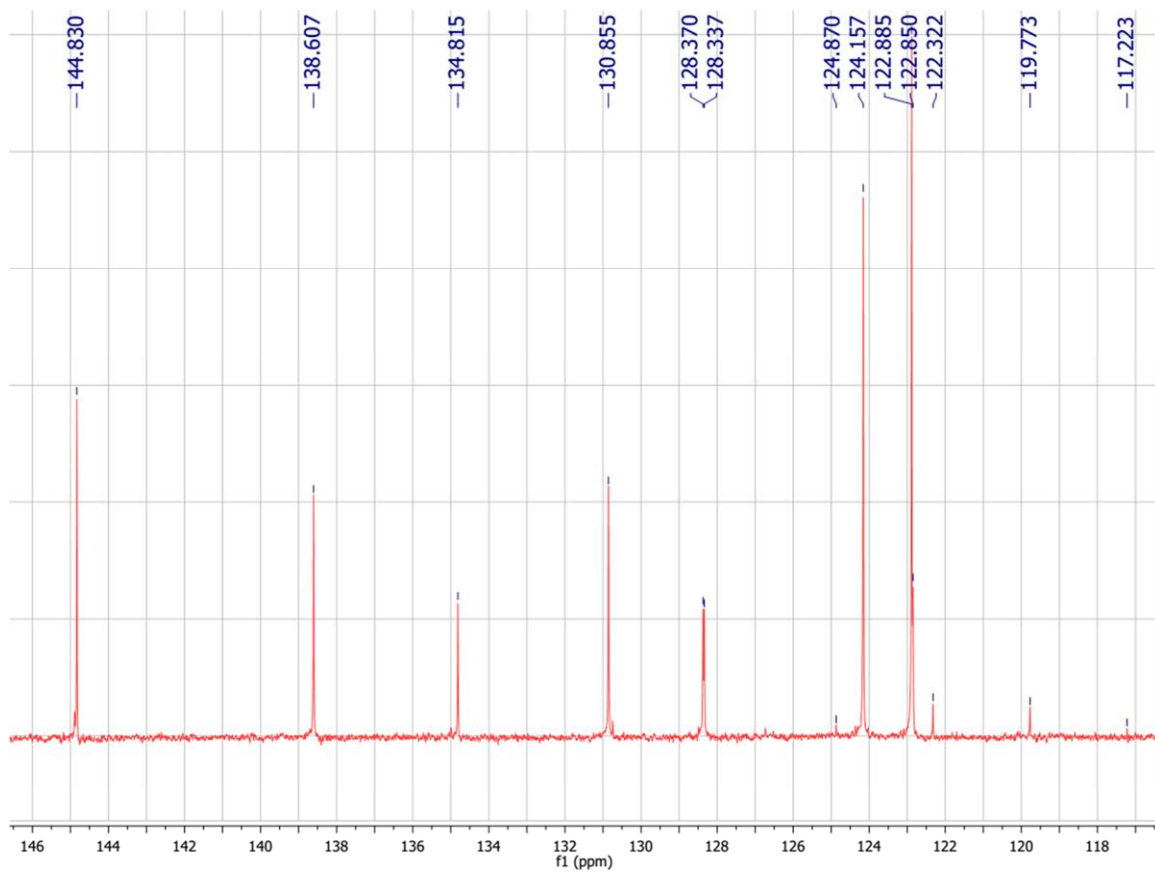

**Figure S31:**  $^{13}\text{C}$  NMR (126 Hz,  $\text{CDCl}_3$ ) spectrum (117–146 ppm) of complex **5a**.

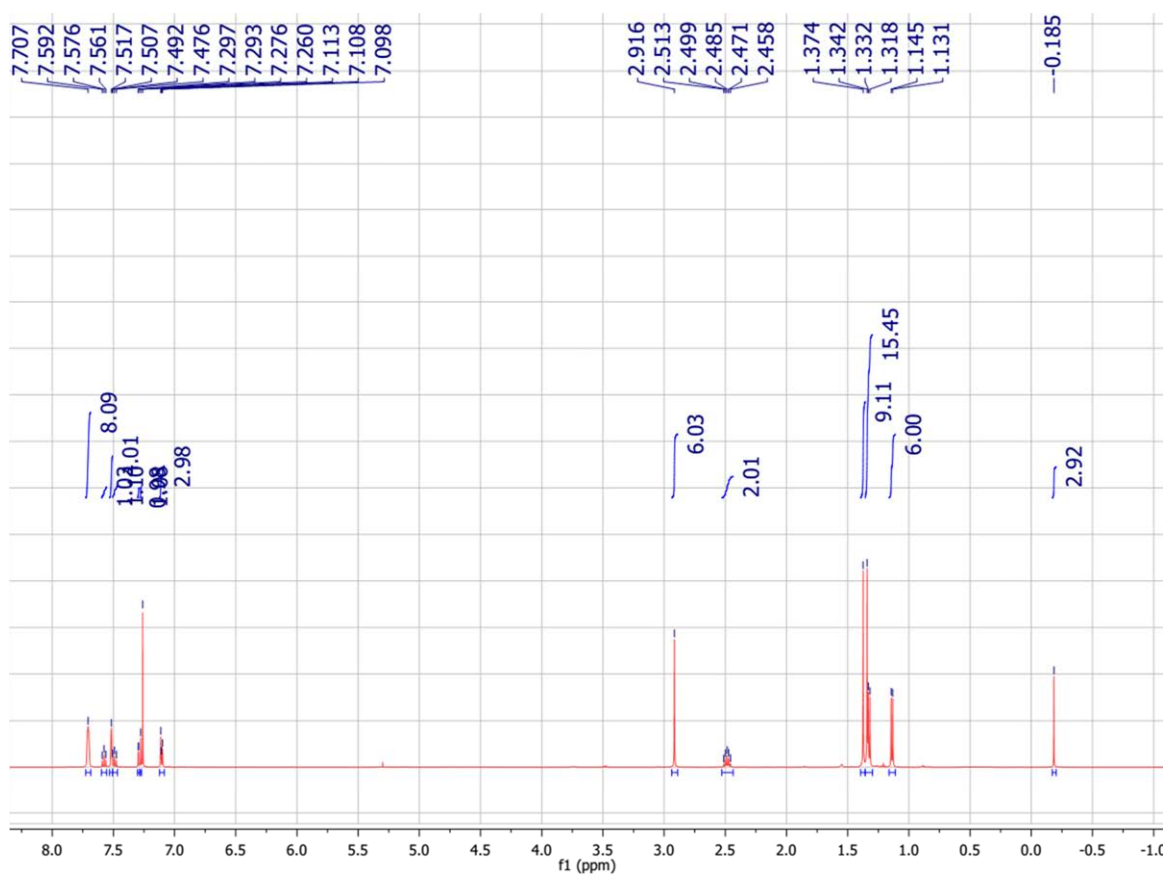

**Figure S32:**  $^1\text{H}$  NMR (500 Hz,  $\text{CDCl}_3$ ) spectrum of complex **5b**.

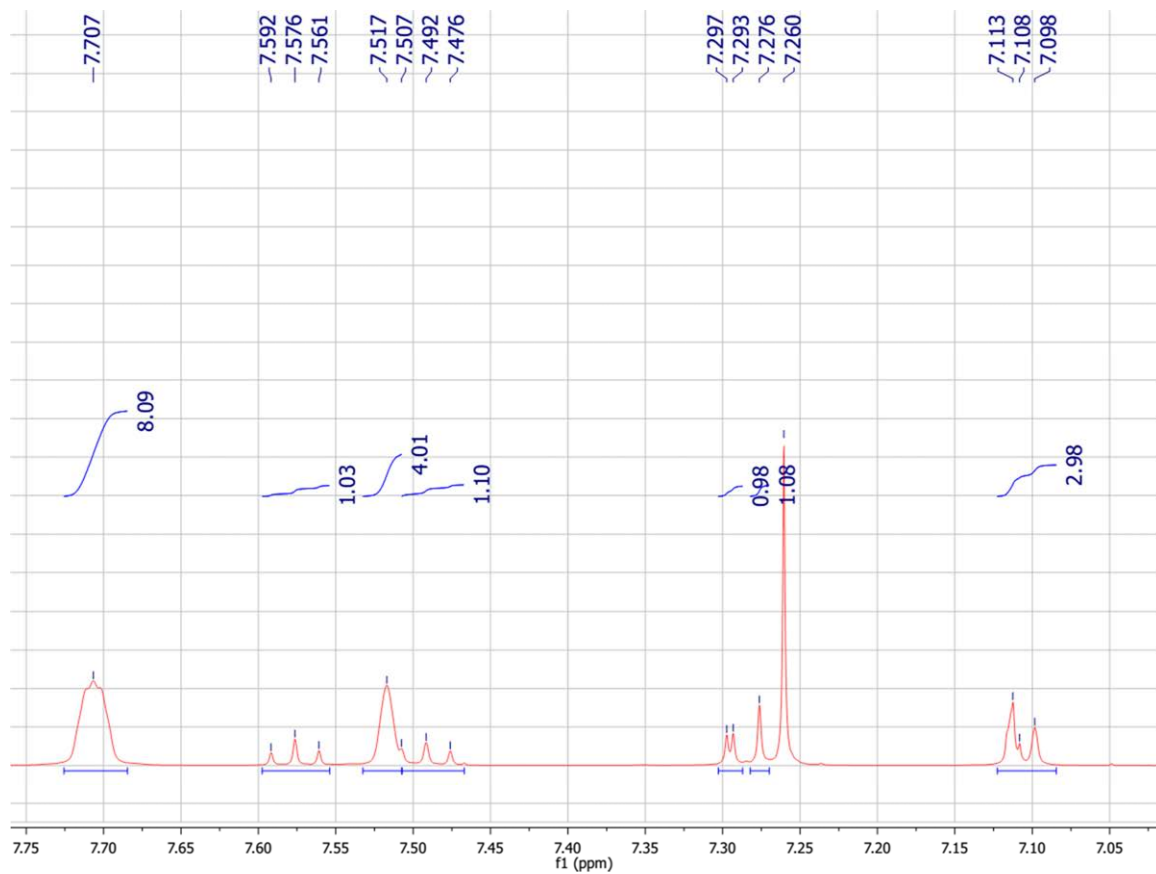

**Figure S33:** <sup>1</sup>H NMR (500 Hz, CDCl<sub>3</sub>) spectrum (7.00–7.75 ppm) of complex **5b**.

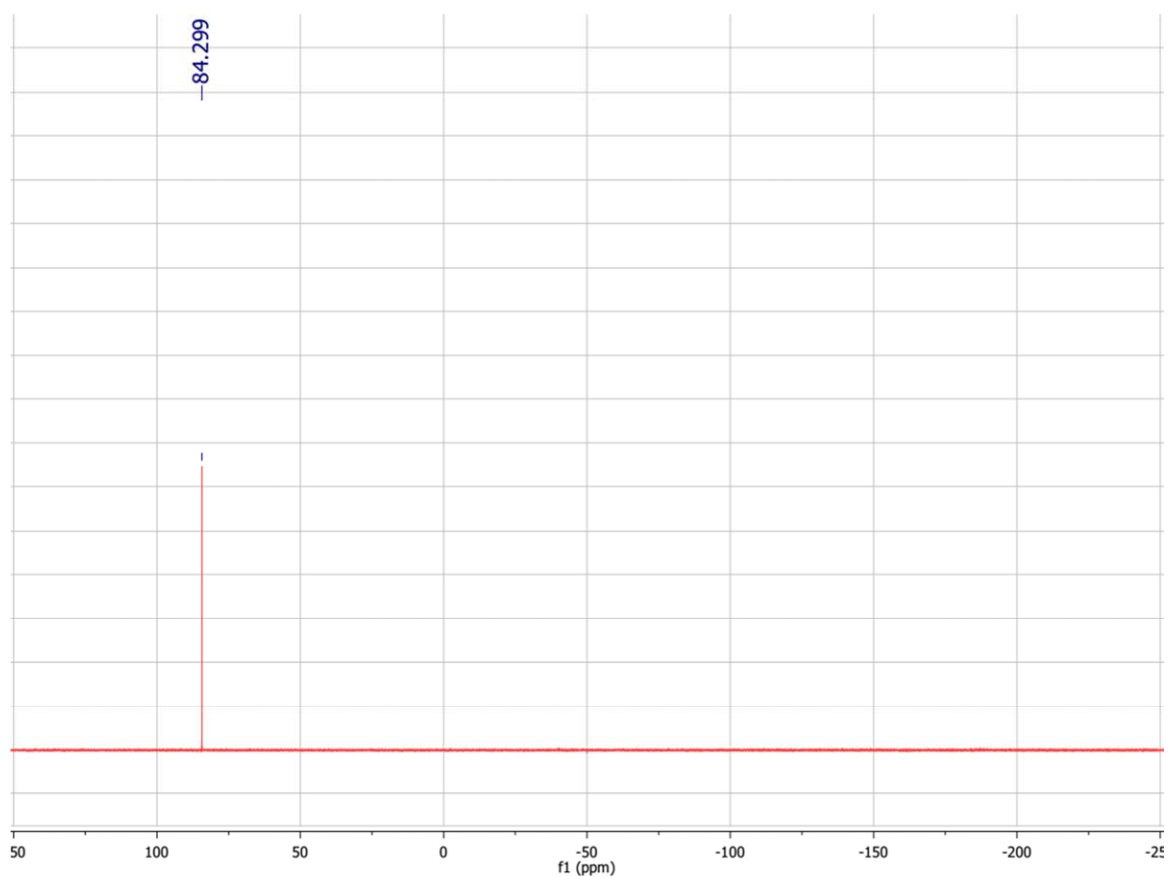

**Figure S34:** <sup>31</sup>P NMR (202 Hz, CDCl<sub>3</sub>) spectrum of complex **5b**.

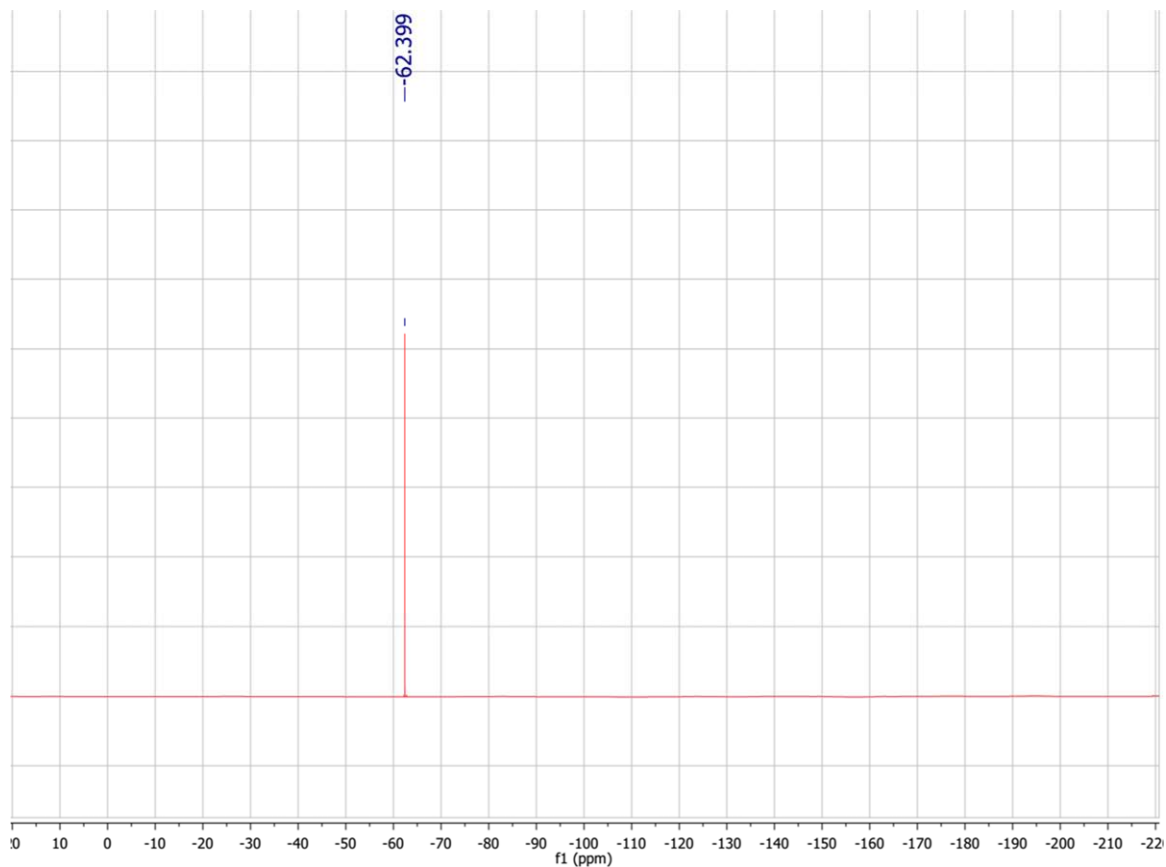

**Figure S35:**  $^{19}\text{F}$  NMR (470 Hz,  $\text{CDCl}_3$ ) spectrum of complex **5b**.

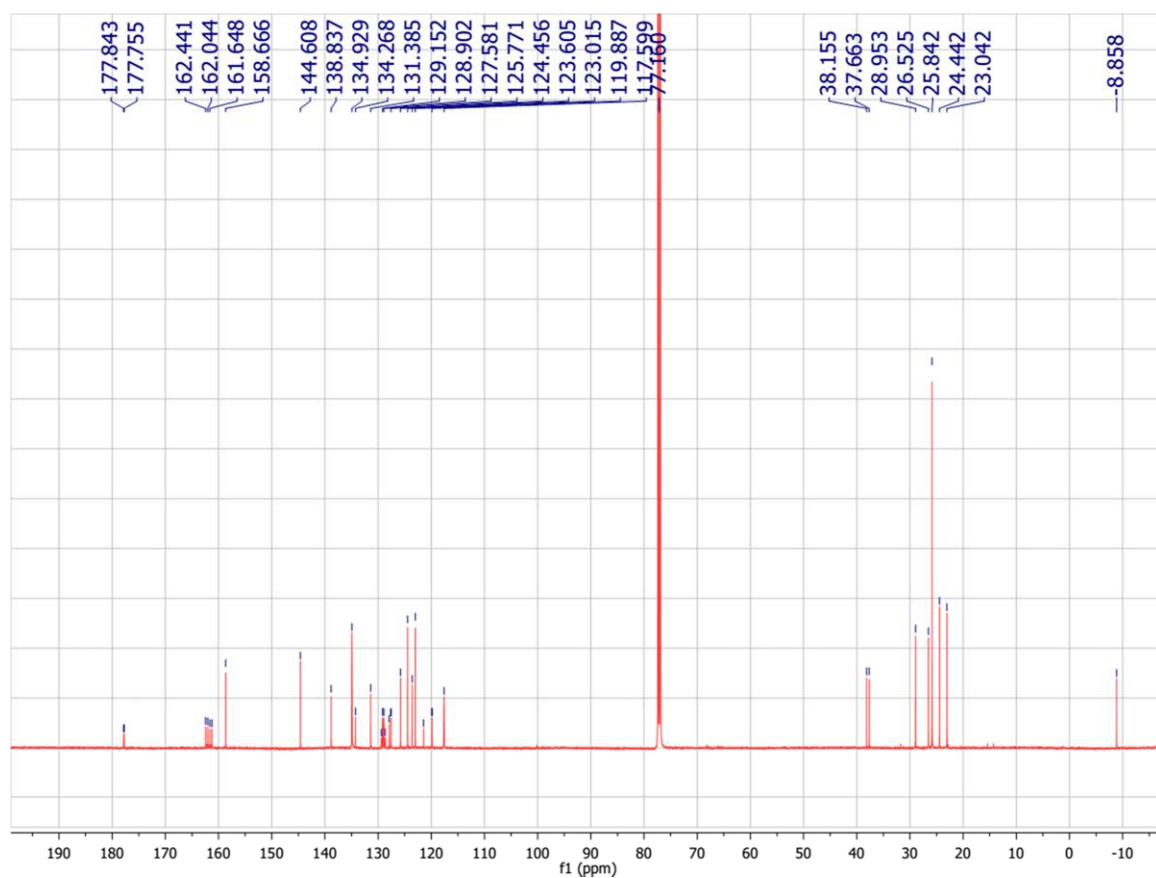

**Figure S36:**  $^{13}\text{C}$  NMR (500 Hz,  $\text{CDCl}_3$ ) spectrum of complex **5b**.

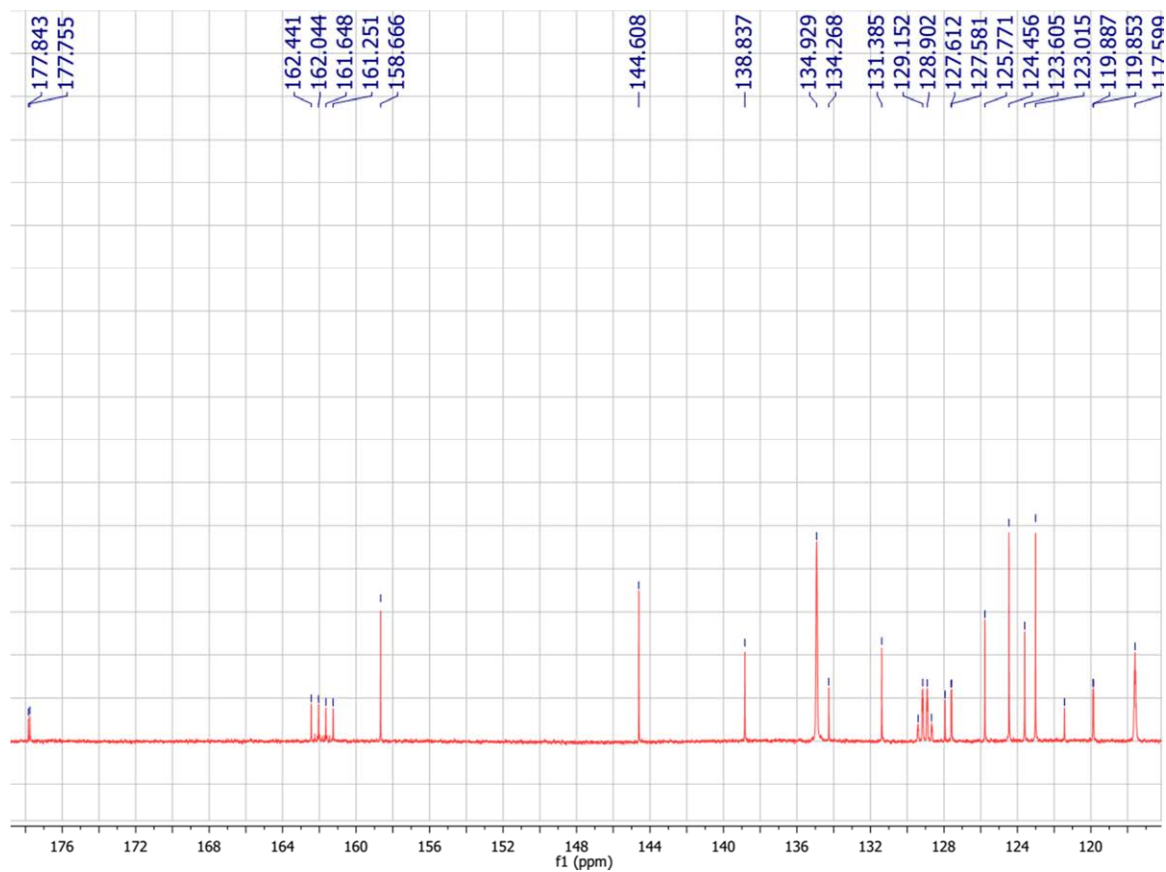

**Figure S37:**  $^{13}\text{C}$  NMR (500 Hz,  $\text{CDCl}_3$ ) spectrum (116–180 ppm) of complex **5b**.

#### 4. X-ray Crystallographic Data of Complexes 4a and 5a

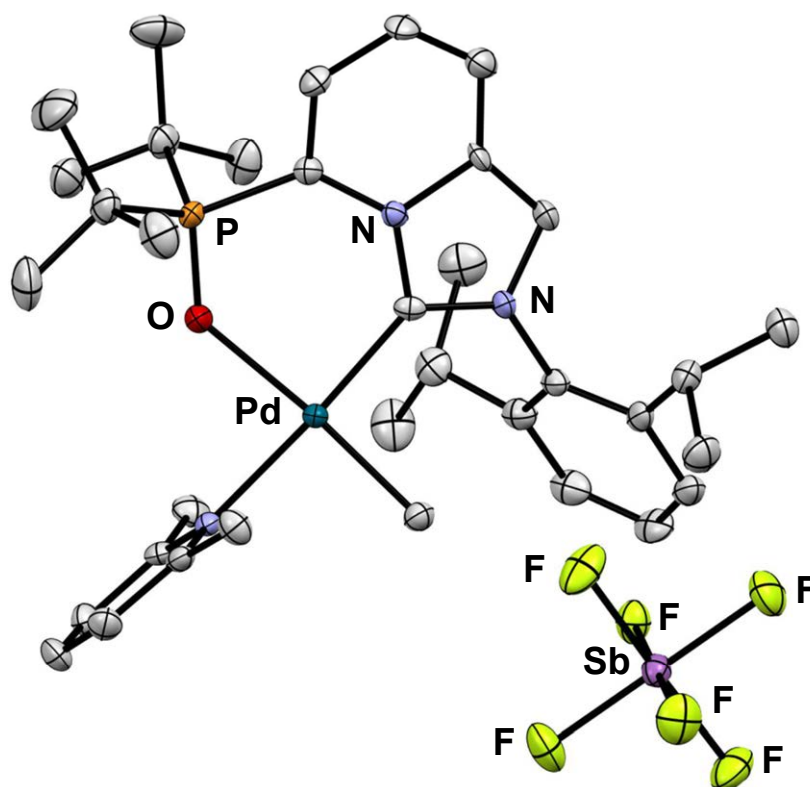

**Figure S38.** X-ray structure of **4a** with thermal ellipsoids of 50% probability. Hydrogen atoms are omitted for clarity.

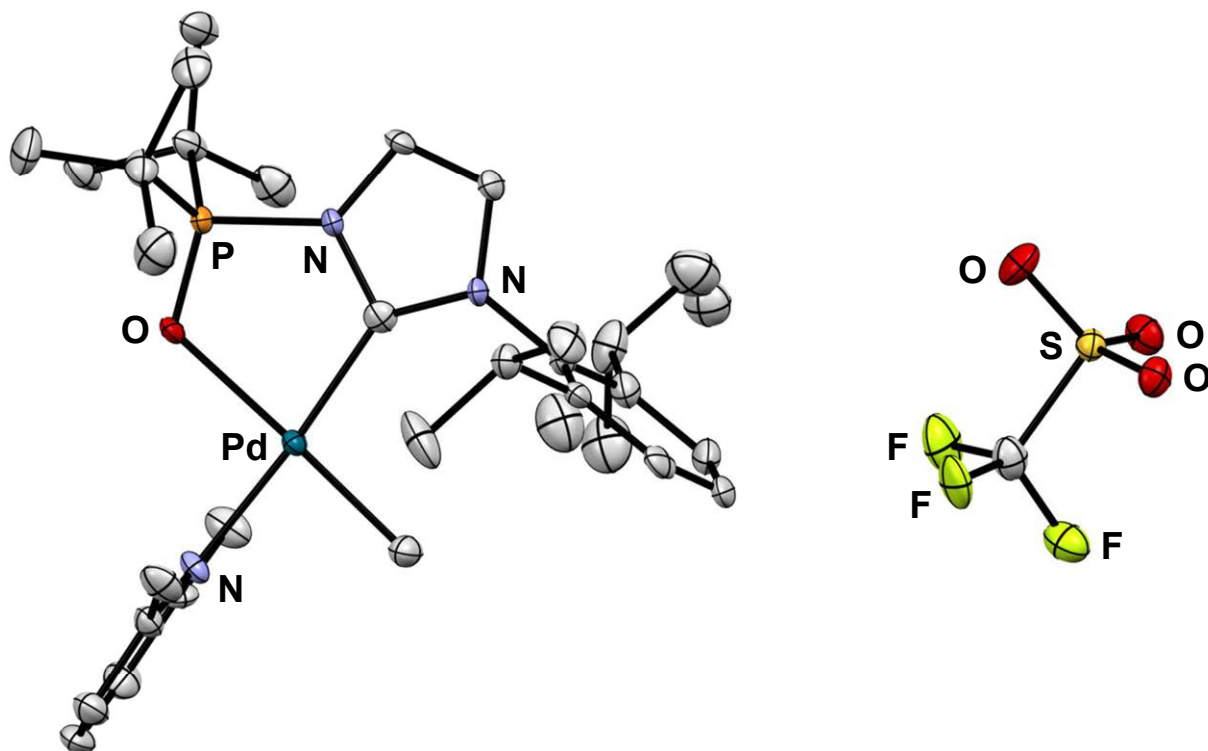

**Figure S39.** X-ray structure of **5a** with thermal ellipsoids of 50% probability. Hydrogen atoms are omitted for clarity.



**Table S3.** Crystal Data and Structure Refinement for Complexes **4a** and **5a**.

| Complex                                             | <b>4a</b>                                                           | <b>5a</b>                                                                         |
|-----------------------------------------------------|---------------------------------------------------------------------|-----------------------------------------------------------------------------------|
| CCDC number                                         | 1525118                                                             | 1525117                                                                           |
| Empirical formula                                   | C <sub>35</sub> H <sub>51</sub> F <sub>6</sub> N <sub>3</sub> OPdSb | C <sub>32</sub> H <sub>49</sub> F <sub>3</sub> N <sub>3</sub> O <sub>4</sub> PPdS |
| Formula weight                                      | 902.90                                                              | 766.17                                                                            |
| Temperature (K)                                     | 93                                                                  | 93                                                                                |
| Wavelength (Å)                                      | 0.71075                                                             | 0.71075                                                                           |
| Crystal system                                      | monoclinic                                                          | monoclinic                                                                        |
| Space group                                         | <i>P</i> 2 <sub>1</sub> / <i>c</i>                                  | <i>P</i> 2 <sub>1</sub> / <i>n</i>                                                |
| Unit cell dimensions                                |                                                                     |                                                                                   |
| a (Å)                                               | 10.179(3)                                                           | 10.844(3)                                                                         |
| b (Å)                                               | 22.751(8)                                                           | 20.403(6)                                                                         |
| c (Å)                                               | 16.348(6)                                                           | 17.005(5)                                                                         |
| α(°)                                                | 90                                                                  | 90                                                                                |
| β(°)                                                | 93.349(6)                                                           | 94.838(5)                                                                         |
| γ(°)                                                | 90                                                                  | 90                                                                                |
| Volume (Å <sup>3</sup> )                            | 3786(2)                                                             | 3749.0(19)                                                                        |
| <i>Z</i>                                            | 4                                                                   | 4                                                                                 |
| Density (calculated) (g/cm <sup>3</sup> )           | 1.584                                                               | 1.357                                                                             |
| Absorption coefficient (mm <sup>-1</sup> )          | 1.292                                                               | 0.645                                                                             |
| <i>F</i> (000)                                      | 1824                                                                | 1592                                                                              |
| Crystal size (mm <sup>3</sup> )                     | 0.25 × 0.25 × 0.10                                                  | 0.20 × 0.10 × 0.03                                                                |
| Theta (max)                                         | 25.999                                                              | 25.999                                                                            |
| Index ranges                                        |                                                                     |                                                                                   |
|                                                     | -12 ≤ <i>h</i> ≤ 12                                                 | -12 ≤ <i>h</i> ≤ 13                                                               |
|                                                     | -27 ≤ <i>k</i> ≤ 28                                                 | -25 ≤ <i>k</i> ≤ 24                                                               |
|                                                     | -20 ≤ <i>l</i> ≤ 18                                                 | -20 ≤ <i>l</i> ≤ 19                                                               |
| Reflections collected                               | 26298                                                               | 26195                                                                             |
| Independent reflections [ <i>R</i> (int)]           | 7435 [ <i>R</i> (int) = 0.0730]                                     | 7350 [ <i>R</i> (int) = 0.0801]                                                   |
| Data completeness                                   | 99.9%                                                               | 99.9%                                                                             |
| Absorption correction                               | Multi-scan                                                          | Multi-scan                                                                        |
| Max. and min. transmission                          | 1.000 and 0.788                                                     | 1.000 and 0.617                                                                   |
| Refinement method                                   | Full-matrix least-squares on <i>F</i> <sup>2</sup>                  | Full-matrix least-squares on <i>F</i> <sup>2</sup>                                |
| Data / restraints / parameters                      | 7435 / 0 / 446                                                      | 7350 / 36 / 442                                                                   |
| Goodness-of-fit on <i>F</i> <sup>2</sup>            | 1.067                                                               | 1.124                                                                             |
| Final <i>R</i> indices [ <i>I</i> > 2σ( <i>I</i> )] | <i>R</i> <sub>1</sub> = 0.0447, <i>wR</i> <sub>2</sub> = 0.0819     | <i>R</i> <sub>1</sub> = 0.0651, <i>wR</i> <sub>2</sub> = 0.1425                   |
| <i>R</i> indices (all data)                         | <i>R</i> <sub>1</sub> = 0.0573, <i>wR</i> <sub>2</sub> = 0.0869     | <i>R</i> <sub>1</sub> = 0.0743, <i>wR</i> <sub>2</sub> = 0.1478                   |
| Max/min diff. peaks (e.Å <sup>-3</sup> )            | 0.735 / -0.588                                                      | 1.823 / -1.428                                                                    |

## 5. NMR Spectra, SEC Charts, and DSC Charts of Polymers

### General Notes for the Characterization

In  $^{13}\text{C}$  NMR analyses, artifact pairs derived from the solvent signal of 1,1,2,2-tetrachloroethane (typically at  $\delta = 78.3$  and  $70.7$  ppm,  $82.5$  and  $65.9$  ppm,  $90.8$  and  $57.6$  ppm,  $99.1$  and  $49.3$  ppm,  $107.4$  and  $41.1$  ppm, marked with \*) and impurities in the solvent ( $\text{CHCl}_2\text{CCl}_3$ :  $\delta = 79.8$  and  $99.7$  ppm,  $\text{CCl}_2\text{CCl}_2$ :  $\delta = 120.2$  ppm,  $\text{CHClCCl}_2$ :  $\delta = 116.6$  and  $121.6$  ppm, marked with \*\*) were excluded from the calculation of the extent of branches and the incorporation ratio of polar monomers.

Observed  $^{13}\text{C}$  NMR signals of polyethylenes were assigned according to the following literatures; polyethylene and ethylene/allyl monomer copolymers<sup>13</sup>, ethylene/acrylate copolymers.<sup>14</sup>

## 5.1 Data of polyethylene (Table 1)

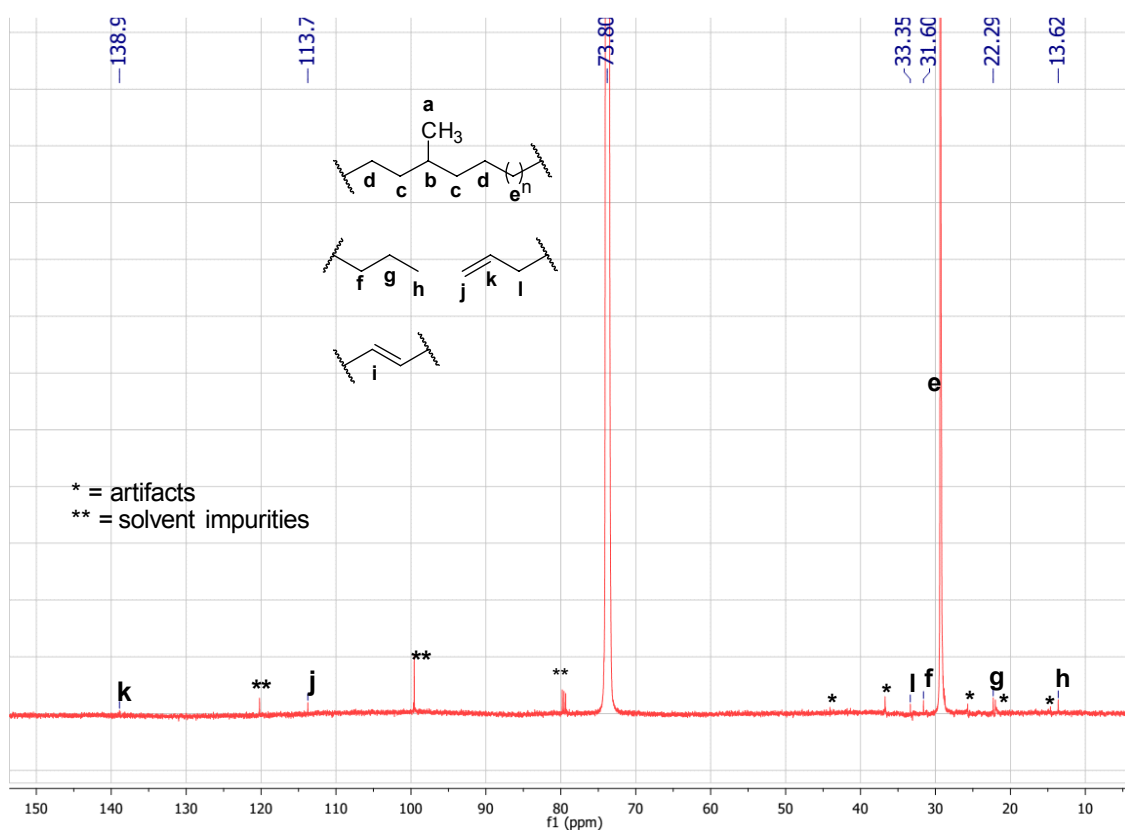

**Figure S40.** Quantitative  $^{13}\text{C}$  NMR spectrum (126 MHz, 1,1,2,2-tetrachloroethane- $d_2$ , 120 °C, inverse gated) of polyethylene obtained by **4b** at 30 °C (Table 1, entry 1).

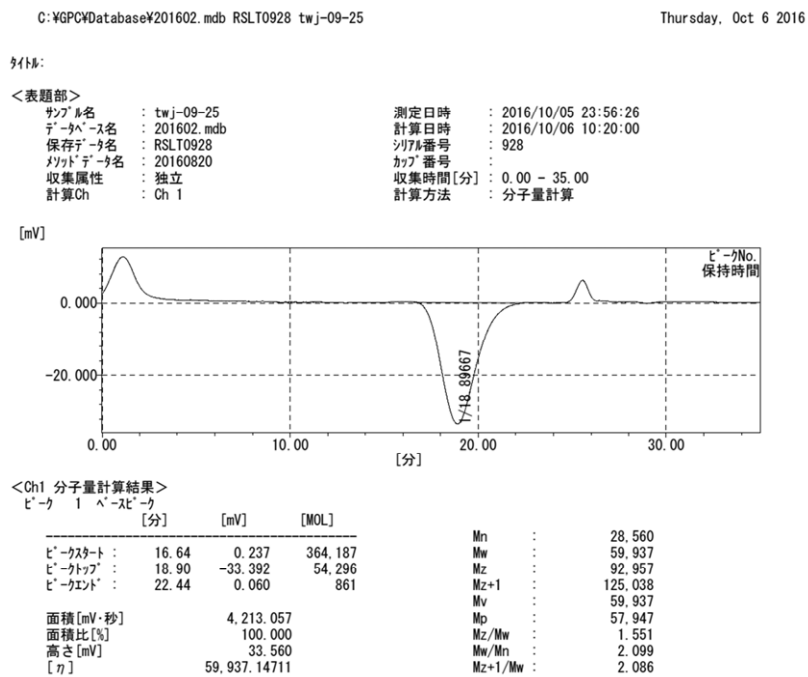

**Figure S41.** SEC chart of polyethylene obtained by **4b** (Table 1, entry 1).

$M_n$  (PS) = 29 kg/mol was corrected to  $M_n$  (PE) = 12 kg/mol by universal calibration.

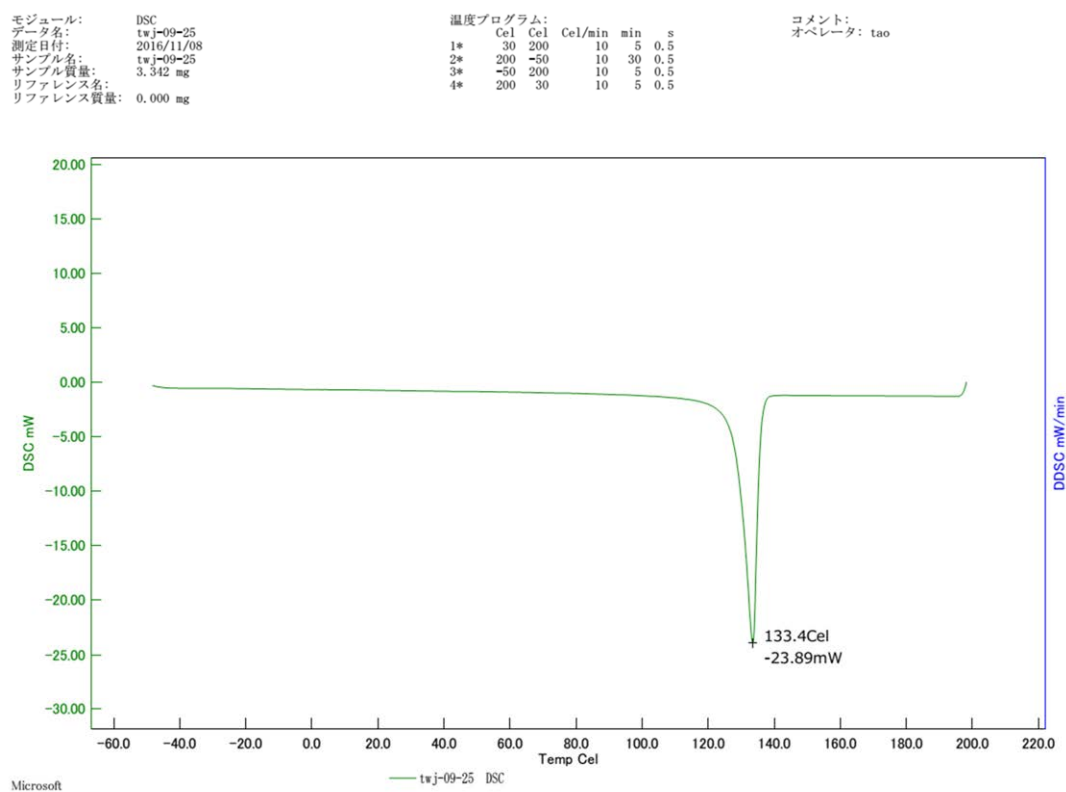

**Figure S42.** DSC traces of polyethylene obtained by **4b** (Table 1, entry 1).

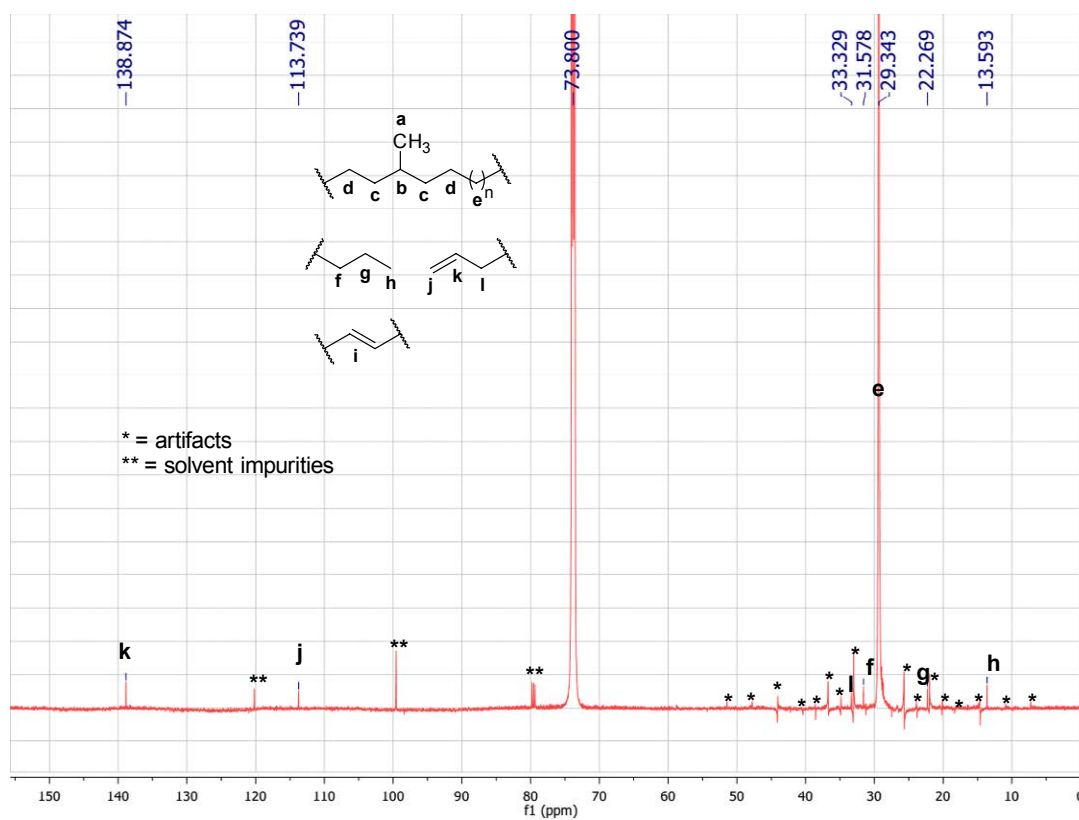

**Figure S43.** Quantitative  $^{13}\text{C}$  NMR spectrum (126 MHz, 1,1,2,2-tetrachloroethane- $d_2$ , 120 °C, inverse gated) of polyethylene obtained by **4b** at 30 °C (Table 1, entry 2).

タイトル:

&lt;表題部&gt;

サンプル名 : twj-09-15  
 データベース名 : 201602.mdb  
 保存データ名 : RSLT0894  
 マットデータ名 : 20150605  
 収集属性 : 独立  
 計算Ch : Ch 1

測定日時 : 2016/07/27 11:55:57  
 計算日時 : 2016/07/27 13:18:14  
 シリアル番号 : 894  
 カップ番号 :  
 収集時間[分] : 0.00 - 35.00  
 計算方法 : 分子量計算

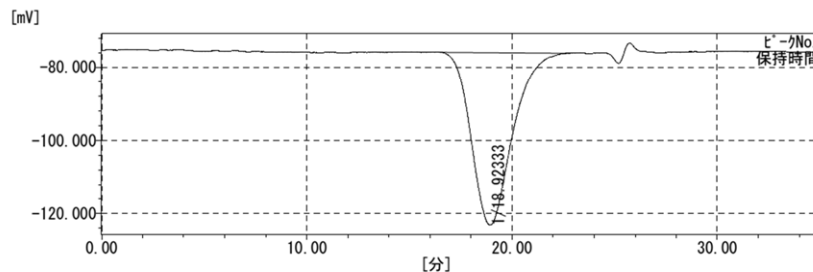

&lt;Ch1 分子量計算結果&gt;

| ピーク      | 1     | ピーク          | 1       | ピーク     | 1 |         |  |
|----------|-------|--------------|---------|---------|---|---------|--|
|          | [分]   | [mV]         | [MOL]   |         |   |         |  |
| ピークスタート  | 16.51 | -75.891      | 395,476 | Mn      | : | 24,416  |  |
| ピークトップ   | 18.92 | -123.184     | 49,919  | Mw      | : | 55,728  |  |
| ピークエンド   | 22.84 | -76.155      | 444     | Mz      | : | 89,918  |  |
|          |       |              |         | Mz+1    | : | 125,129 |  |
|          |       |              |         | Mv      | : | 55,728  |  |
| 面積[mV・秒] |       | 6,034.956    |         | Mp      | : | 53,173  |  |
| 面積比[%]   |       | 100.000      |         | Mz/Mw   | : | 1.614   |  |
| 高さ[mV]   |       | 47.192       |         | Mw/Mn   | : | 2.282   |  |
| [η]      |       | 55,728.20954 |         | Mz+1/Mw | : | 2.245   |  |

Figure S44. SEC chart of polyethylene obtained by **4b** (Table 1, entry 2).

$M_n$  (PS) = 24 kg/mol was corrected to  $M_n$  (PE) = 11 kg/mol by universal calibration.

モジュール: DSC  
 データ名: twj-09-15  
 測定日付: 2016/11/08  
 サンプル名: twj-09-15  
 サンプル質量: 3.099 mg  
 リファレンス名:  
 リファレンス質量: 0.000 mg

温度プログラム:  

|    | Cell | Cell | Cell/min | min | s   |
|----|------|------|----------|-----|-----|
| 1* | 30   | 200  | 10       | 5   | 0.5 |
| 2* | 200  | -50  | 10       | 30  | 0.5 |
| 3* | -50  | 200  | 10       | 5   | 0.5 |
| 4* | 200  | 30   | 10       | 5   | 0.5 |

コメント:  
 オペレータ: tao

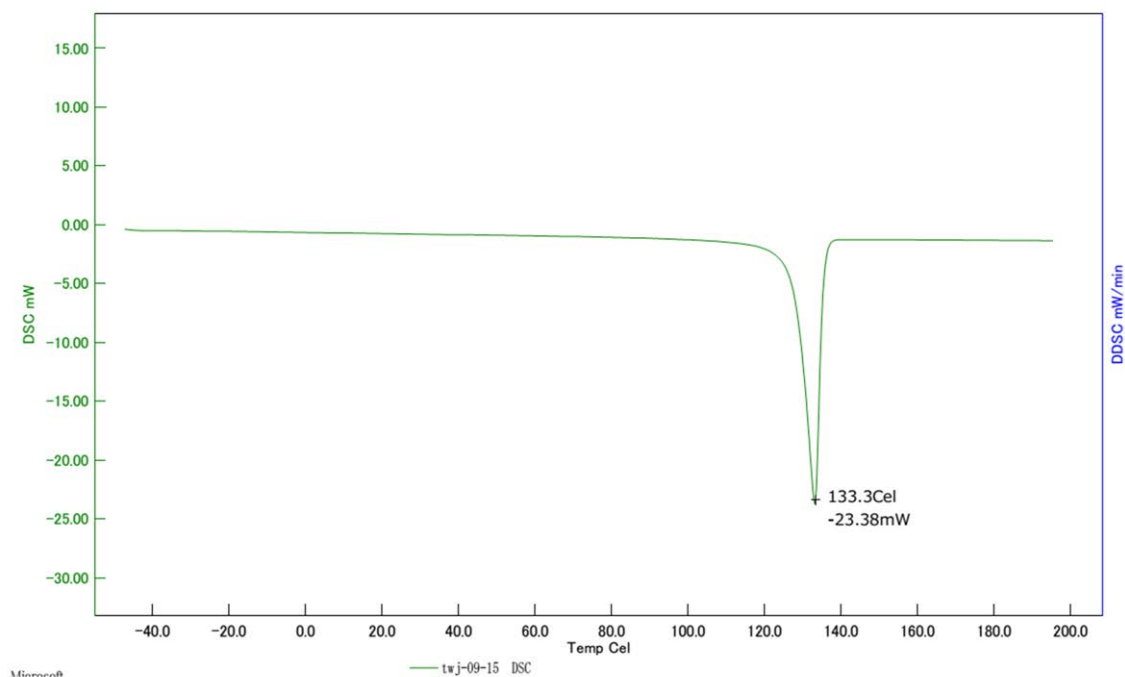Figure S45. DSC traces of polyethylene obtained by **4b** (Table 1, entry 2).

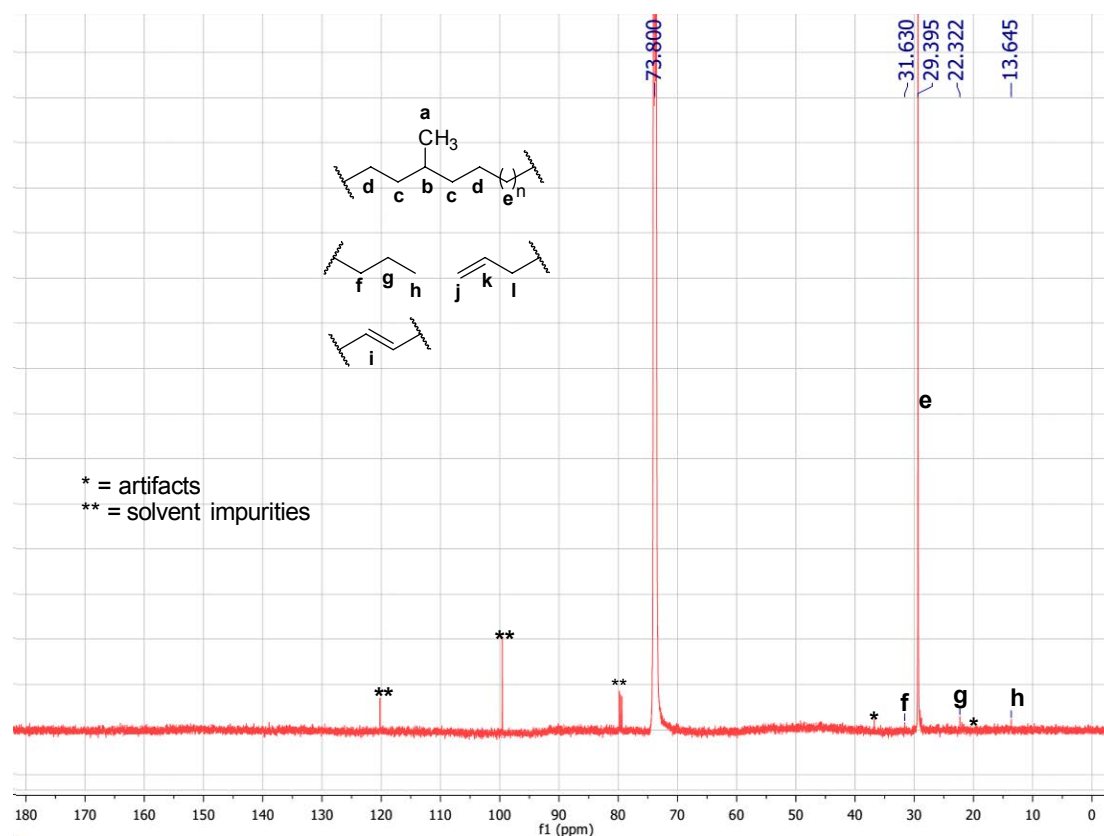

**Figure S46.** Quantitative  $^{13}\text{C}$  NMR spectrum (126 MHz, 1,1,2,2-tetrachloroethane- $d_2$ , 120 °C, inverse gated) of polyethylene obtained by **4b** at 30 °C (Table 1, entry 3).

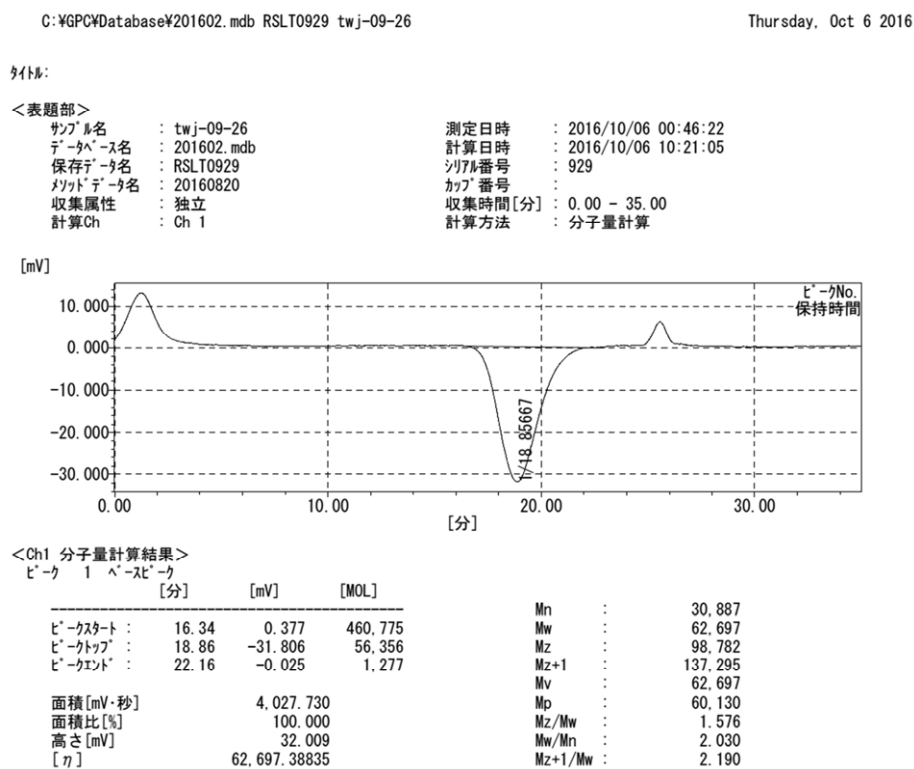

**Figure S47.** SEC chart of polyethylene obtained by **4b** (Table 1, entry 3).

$M_n$  (PS) = 31 kg/mol was corrected to  $M_n$  (PE) = 13 kg/mol by universal calibration.

モジュール: DSC  
 データ名: twj-09-26  
 測定日付: 2016/11/08  
 サンプル名: twj-09-26  
 サンプル質量: 2.335 mg  
 リファレンス名:  
 リファレンス質量: 0.000 mg

温度プログラム:  

|    | Cell | Cell | Cell/min | min | s   |
|----|------|------|----------|-----|-----|
| 1* | 30   | 200  | 10       | 5   | 0.5 |
| 2* | 200  | -50  | 10       | 30  | 0.5 |
| 3* | -50  | 200  | 10       | 5   | 0.5 |
| 4* | 200  | 30   | 10       | 5   | 0.5 |

コメント:  
 オペレータ: tao

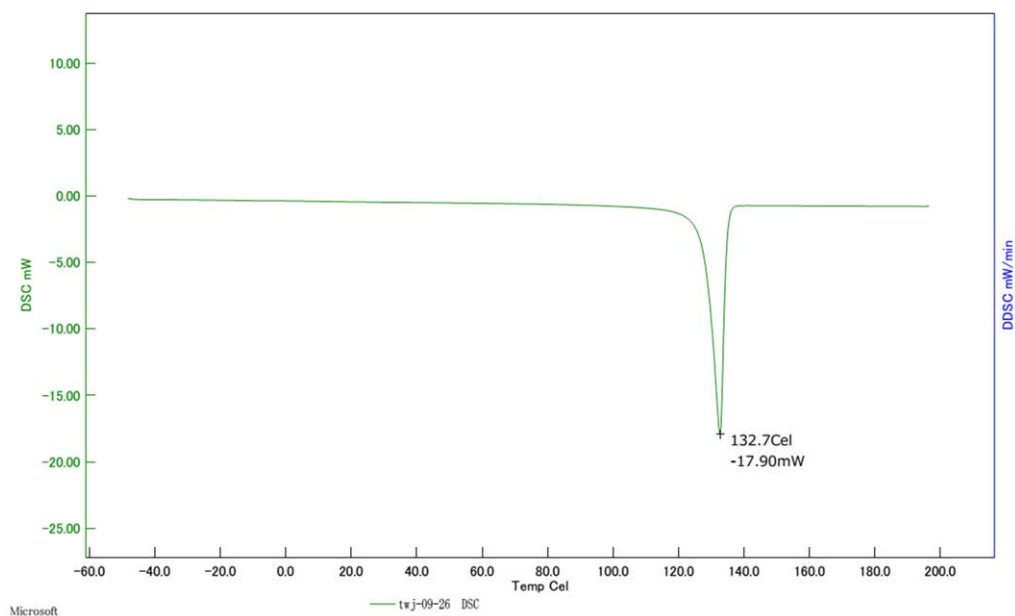

Figure S48. DSC traces of polyethylene obtained by **4b** (Table 1, entry 3).

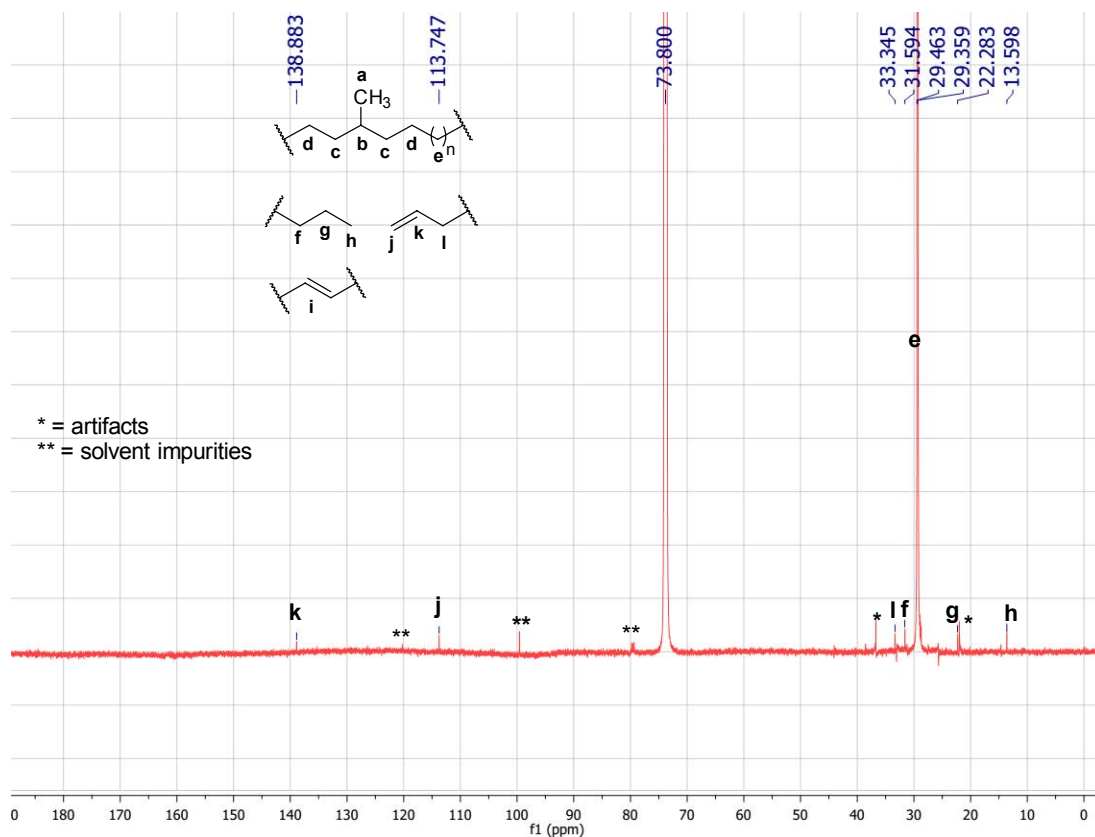

Figure S49. Quantitative  $^{13}\text{C}$  NMR spectrum (126 MHz,  $1,1,1,2,2$ -tetrachloroethane- $d_2$ , 120 °C, inverse gated) of polyethylene obtained by **4b** at 30 °C (Table 1, entry 4).

タイトル:

&lt;表題部&gt;

|             |                 |         |                       |
|-------------|-----------------|---------|-----------------------|
| サンプル名       | : twj-09-4b-10h | 測定日時    | : 2016/12/06 16:16:51 |
| データベース名     | : 201602.mdb    | 計算日時    | : 2016/12/06 17:02:49 |
| 保存データベース名   | : RSLT0965      | シリアル番号  | : 965                 |
| メソッドデータベース名 | : 20160820      | カッパ番号   | :                     |
| 収集属性        | : 独立            | 収集時間[分] | : 0.00 - 35.00        |
| 計算Ch        | : Ch 1          | 計算方法    | : 分子量計算               |

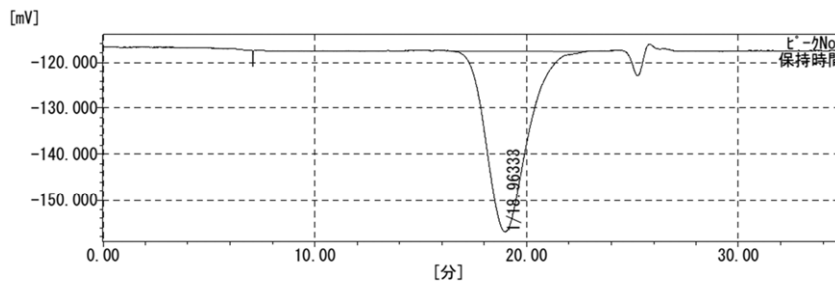

&lt;Ch1 分子量計算結果&gt;

| ピーク      | 1     | ピーク          | 保持時間 [分] | [mV] | [MOL] | Mn      | Mw | Mz | Mz+1 | Mv | Mp | Mz/Mw | Mw/Mn | Mz+1/Mw |
|----------|-------|--------------|----------|------|-------|---------|----|----|------|----|----|-------|-------|---------|
| ピークスタート  | 16.42 | -117.541     | 433,174  |      |       | 24,493  |    |    |      |    |    |       |       |         |
| ピークストップ  | 18.96 | -156.907     | 51,010   |      |       | 55,783  |    |    |      |    |    |       |       |         |
| ピークエンド   | 22.84 | -117.623     | 466      |      |       | 88,996  |    |    |      |    |    |       |       |         |
| 面積[mV・秒] |       | 4,965.464    |          |      |       | 123,701 |    |    |      |    |    |       |       |         |
| 面積比[%]   |       | 100.000      |          |      |       | 55,783  |    |    |      |    |    |       |       |         |
| 高さ[mV]   |       | 39.334       |          |      |       | 53,291  |    |    |      |    |    |       |       |         |
| [η]      |       | 55,783.44577 |          |      |       | 1.595   |    |    |      |    |    |       |       |         |
|          |       |              |          |      |       | 2.278   |    |    |      |    |    |       |       |         |
|          |       |              |          |      |       | 2.218   |    |    |      |    |    |       |       |         |

**Figure S50.** SEC chart of polyethylene obtained by **4b** (Table 1, entry 4).  $M_n$  (PS) = 25 kg/mol was corrected to  $M_n$  (PE) = 11 kg/mol by universal calibration.

|           |               |          |      |          |     |        |
|-----------|---------------|----------|------|----------|-----|--------|
| モジュール:    | DSC           | 温度プログラム: |      | コメント:    |     |        |
| データ名:     | twj-09-4b-10h | Cell     | Cell | Cell/min | min | s      |
| 測定日付:     | 2016/12/09    | 1*       | 30   | 200      | 10  | 5 0.5  |
| サンプル名:    | twj-09-4b-10h | 2*       | 200  | -50      | 10  | 30 0.5 |
| サンプル質量:   | 2.645 mg      | 3*       | -50  | 200      | 10  | 5 0.5  |
| リファレンス名:  |               | 4*       | 200  | 30       | 10  | 5 0.5  |
| リファレンス質量: | 0.000 mg      |          |      |          |     |        |

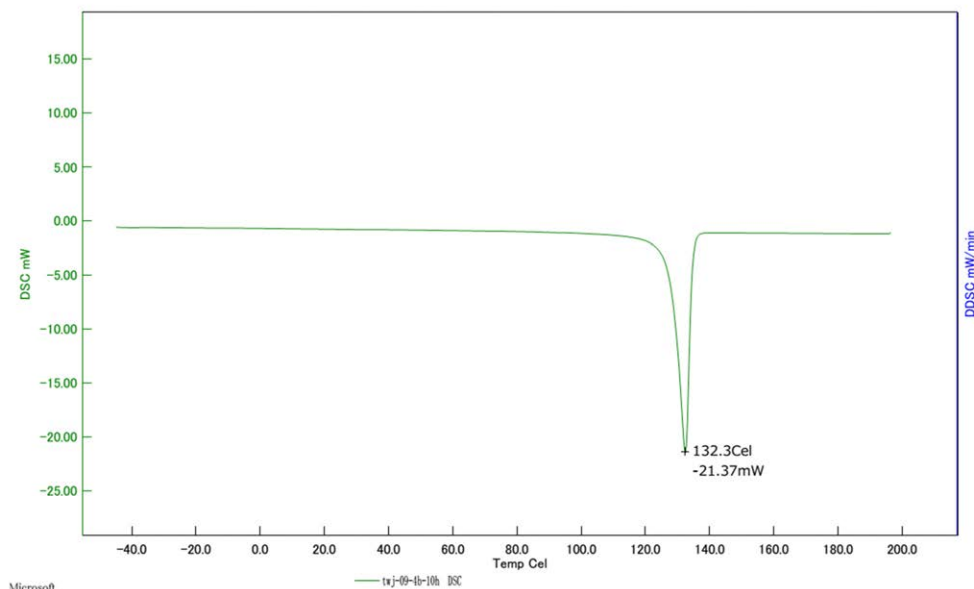

**Figure S51.** DSC traces of polyethylene obtained by **4b** (Table 1, entry 4).



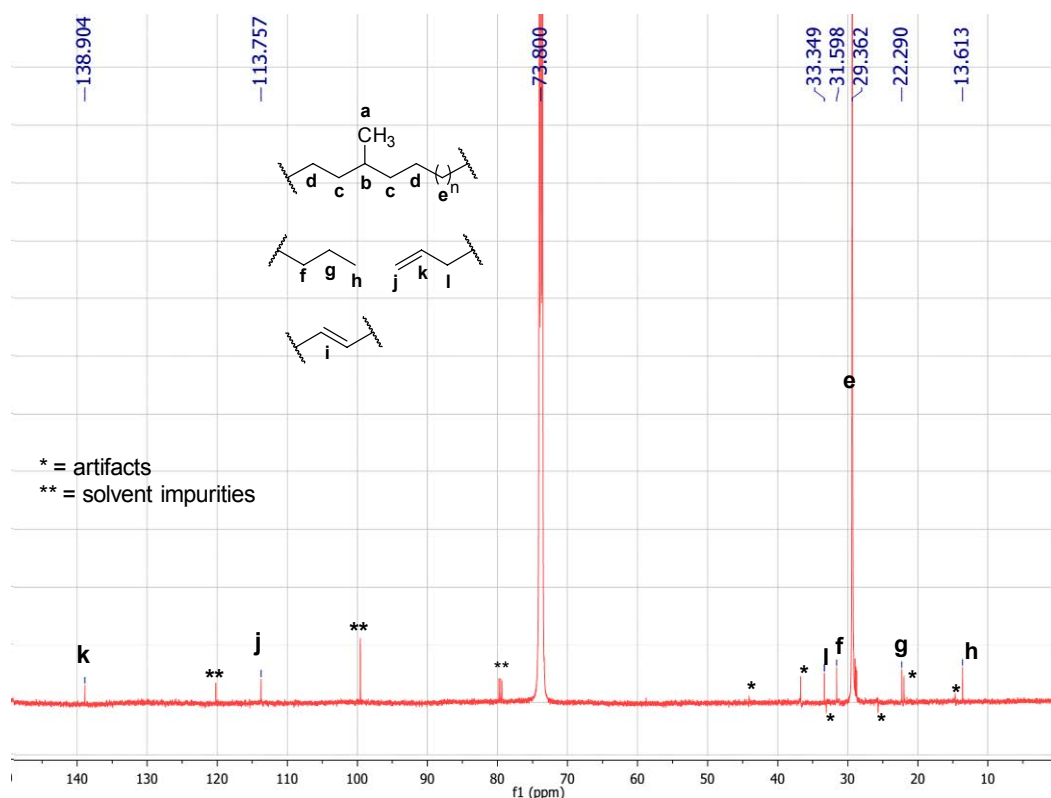

**Figure S52.** Quantitative  $^{13}\text{C}$  NMR spectrum (126 MHz, 1,1,2,2-tetrachloroethane- $d_2$ , 120  $^{\circ}\text{C}$ , inverse gated) of polyethylene obtained by **4b** at 50  $^{\circ}\text{C}$  (Table 1, entry 5). Note: No signal assigned as methyl branch (around 19.5 ppm) or other branches were observed.

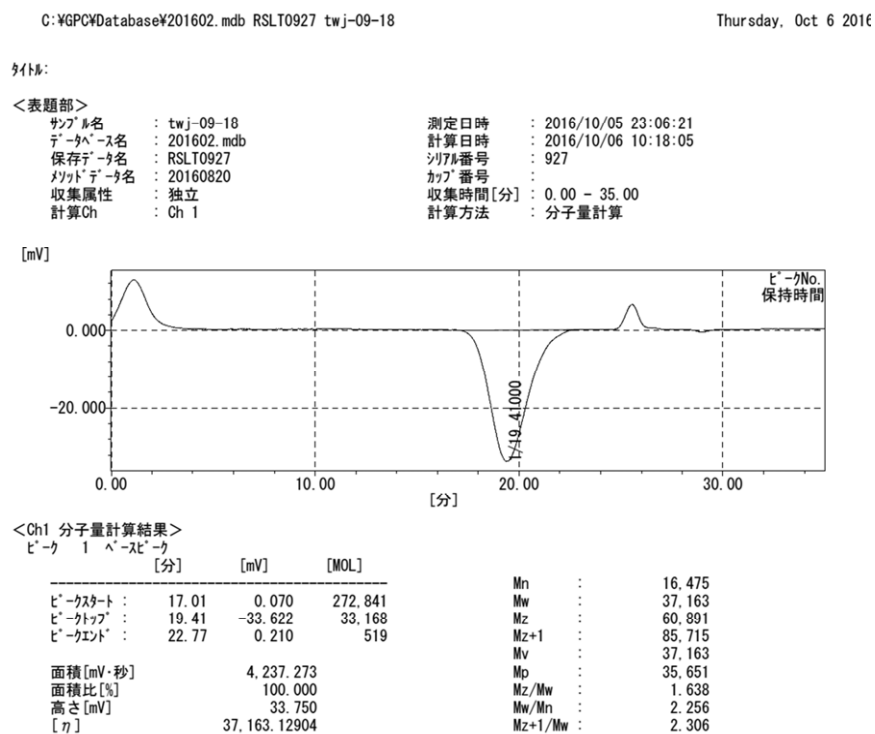

**Figure S53.** SEC chart of polyethylene obtained by **4b** (Table 1, entry 5).

$M_n$  (PS) = 16 kg/mol was corrected to  $M_n$  (PE) = 7.2 kg/mol by universal calibration.

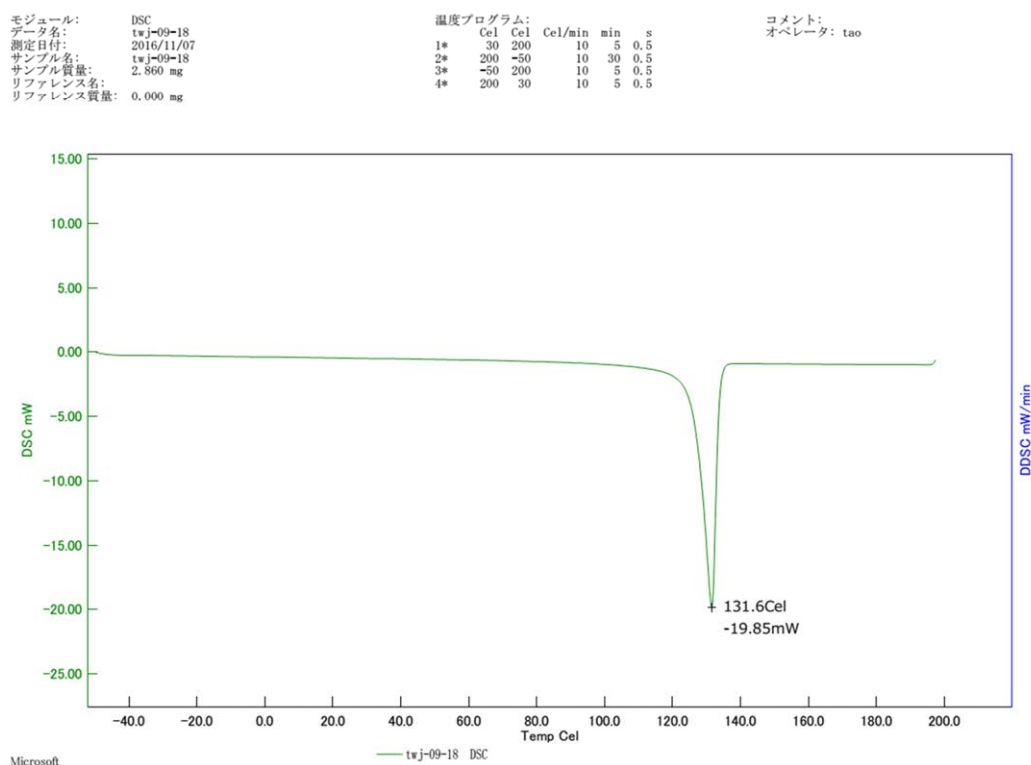

**Figure S54.** DSC traces of polyethylene obtained by **4b** (Table 1, entry 5).

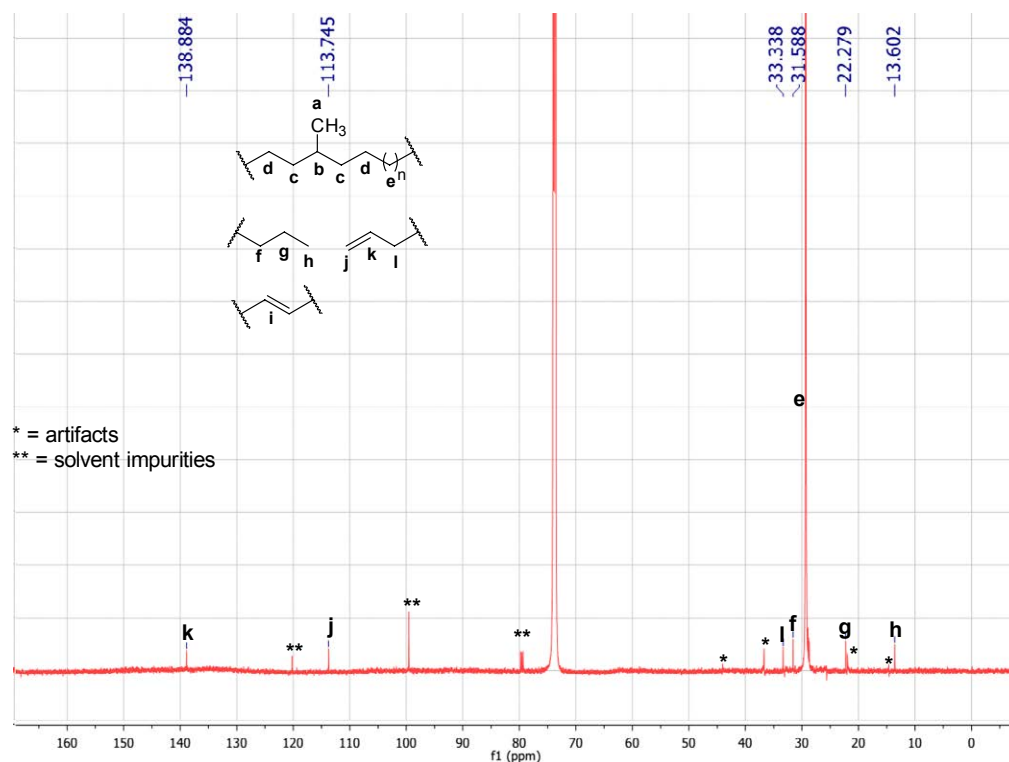

**Figure S55.** Quantitative  $^{13}\text{C}$  NMR spectrum (126 MHz, 1,1,2,2-tetrachloroethane- $d_2$ , 120 °C, inverse gated) of polyethylene obtained by **4b** at 50 °C (Table 1, entry 6).

タイトル:

&lt;表題部&gt;

|          |              |         |                       |
|----------|--------------|---------|-----------------------|
| サンプル名    | : twj-09-16  | 測定日時    | : 2016/07/27 12:45:55 |
| データベース名  | : 201602.mdb | 計算日時    | : 2016/07/27 14:01:39 |
| 保存データ名   | : RSLT0895   | シリアル番号  | : 895                 |
| メソッドデータ名 | : 20150605   | カラム番号   | : 0.00 - 35.00        |
| 収集属性     | : 独立         | 収集時間[分] | : 0.00 - 35.00        |
| 計算Ch     | : Ch 1       | 計算方法    | : 分子量計算               |

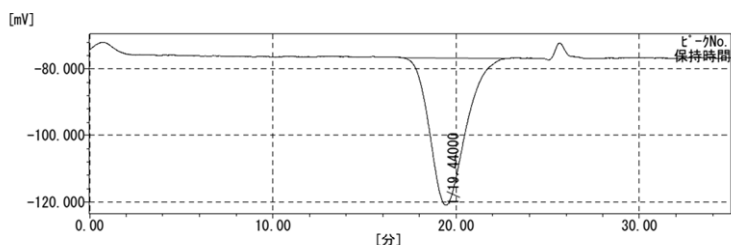

&lt;Ch1 分子量計算結果&gt;

| ピーク      | 1     | ピーク          | [分]     | [mV] | [MOL] | Mn     | Mw     | Mz     | Mz+1   | Mv     | Mo     | Mz/Mw | Mw/Mn | Mz+1/Mw |
|----------|-------|--------------|---------|------|-------|--------|--------|--------|--------|--------|--------|-------|-------|---------|
| ピークスタート  | 17.07 | -76.616      | 252.909 |      |       | 14.912 | 33.996 | 56.450 | 79.940 | 33.996 | 32.865 | 1.660 | 2.280 | 2.351   |
| ピークストップ  | 19.44 | -120.966     | 30.138  |      |       |        |        |        |        |        |        |       |       |         |
| ピークエント   | 22.89 | -76.798      | 415     |      |       |        |        |        |        |        |        |       |       |         |
| 面積[mV・秒] |       | 5.581.902    |         |      |       |        |        |        |        |        |        |       |       |         |
| 面積比[%]   |       | 100.000      |         |      |       |        |        |        |        |        |        |       |       |         |
| 高さ[mV]   |       | 44.276       |         |      |       |        |        |        |        |        |        |       |       |         |
| [カ]      |       | 33.996.16679 |         |      |       |        |        |        |        |        |        |       |       |         |

Figure S56. SEC chart of polyethylene obtained by **4b** (Table 1, entry 6).

$M_n$  (PS) = 15 kg/mol was corrected to  $M_n$  (PE) = 6.5 kg/mol by universal calibration.

|           |            |          |         |        |     |
|-----------|------------|----------|---------|--------|-----|
| モジュール:    | DSC        | 温度プログラム: |         | コメント:  |     |
| データ名:     | twj-09-16  |          |         | オペレータ: | tao |
| 測定日付:     | 2016/11/07 | 1*       | 30 200  |        |     |
| サンプル名:    | twj-09-16  | 2*       | 200 -50 |        |     |
| サンプル質量:   | 2.778 mg   | 3*       | -50 200 |        |     |
| リファレンス名:  |            | 4*       | 200 30  |        |     |
| リファレンス質量: | 0.000 mg   |          |         |        |     |

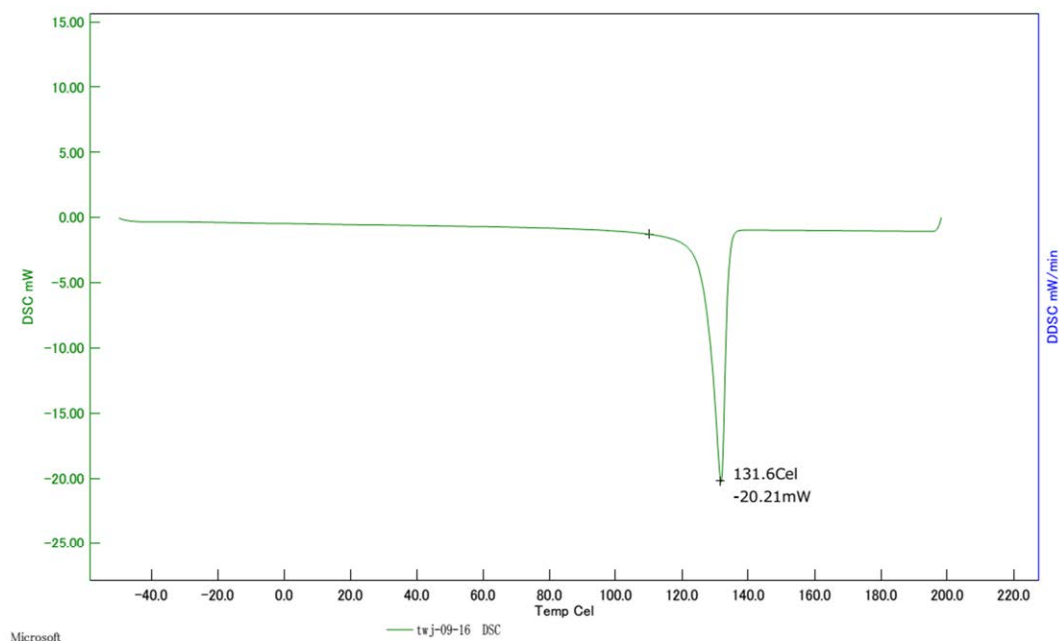Figure S57. DSC traces of polyethylene obtained by **4b** (Table 1, entry 6).

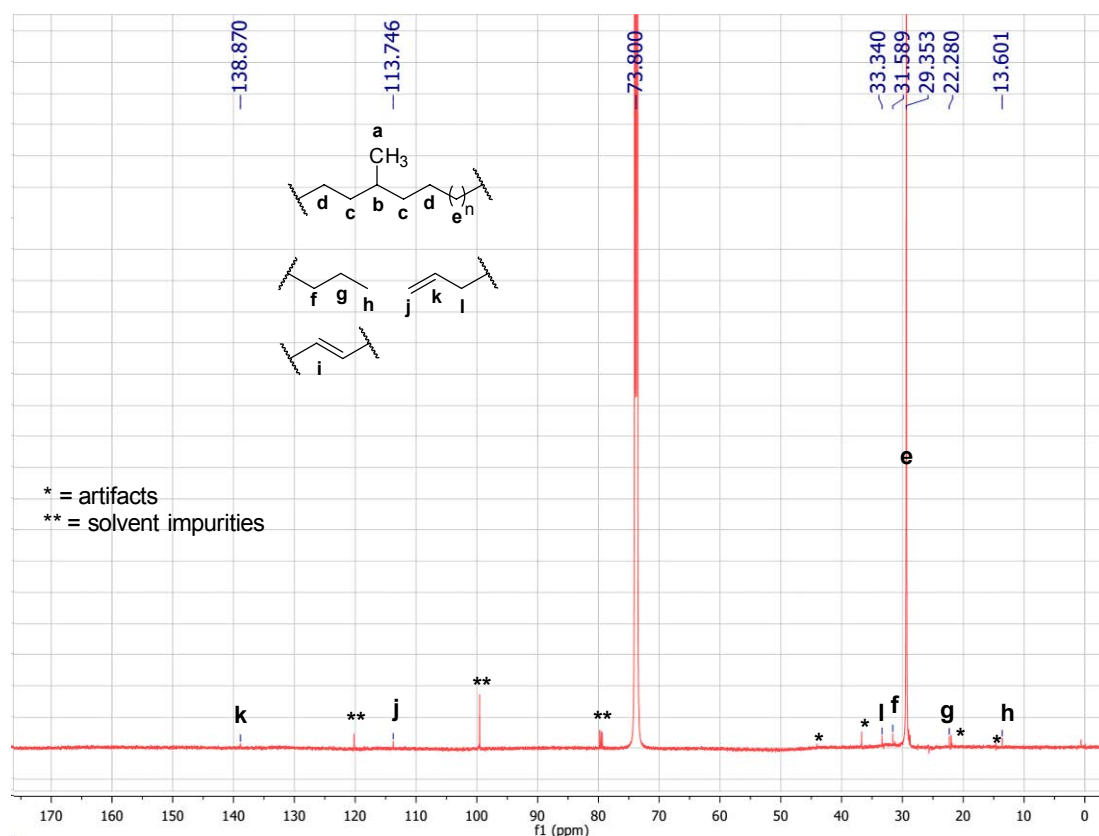

**Figure S58.** Quantitative  $^{13}\text{C}$  NMR spectrum (126 MHz, 1,1,2,2-tetrachloroethane- $d_2$ , 120  $^{\circ}\text{C}$ , inverse gated) of polyethylene obtained by **4c** at 30  $^{\circ}\text{C}$  (Table 1, entry 7).

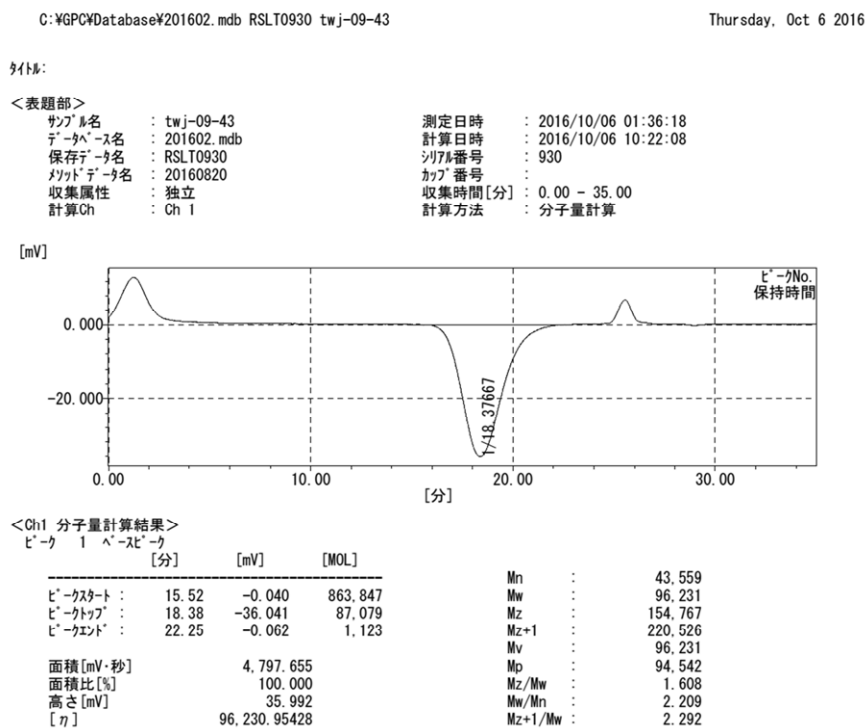

**Figure S59.** SEC chart of polyethylene obtained by **4c** (Table 1, entry 7).

$M_n$  (PS) = 44 kg/mol was corrected to  $M_n$  (PE) = 19 kg/mol by universal calibration.

モジュール: DSC  
 データ名: twj-09-43  
 測定日付: 2016/11/09  
 サンプル名: twj-09-43  
 サンプル質量: 2.560 mg  
 リファレンス名:  
 リファレンス質量: 0.000 mg

温度プログラム:  

|    | Cell | Cell | Cell/min | min | s   |
|----|------|------|----------|-----|-----|
| 1* | 30   | 200  | 10       | 5   | 0.5 |
| 2* | 200  | -50  | 10       | 30  | 0.5 |
| 3* | -50  | 200  | 10       | 5   | 0.5 |
| 4* | 200  | 30   | 10       | 5   | 0.5 |

コメント:  
 オペレータ: tao

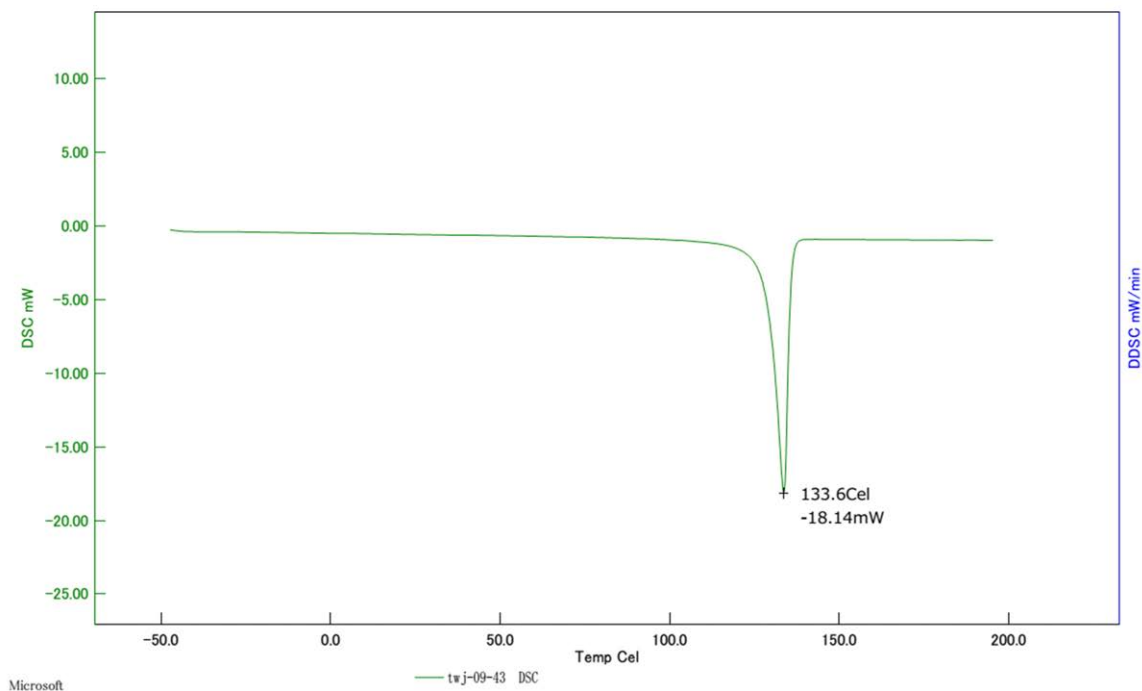

**Figure S60.** DSC traces of polyethylene obtained by **4c** (Table 1, entry 7).

2016/11/14 17:57:40 Page 1 /

### ==== Shimadzu LabSolutions クロマトグラム ====

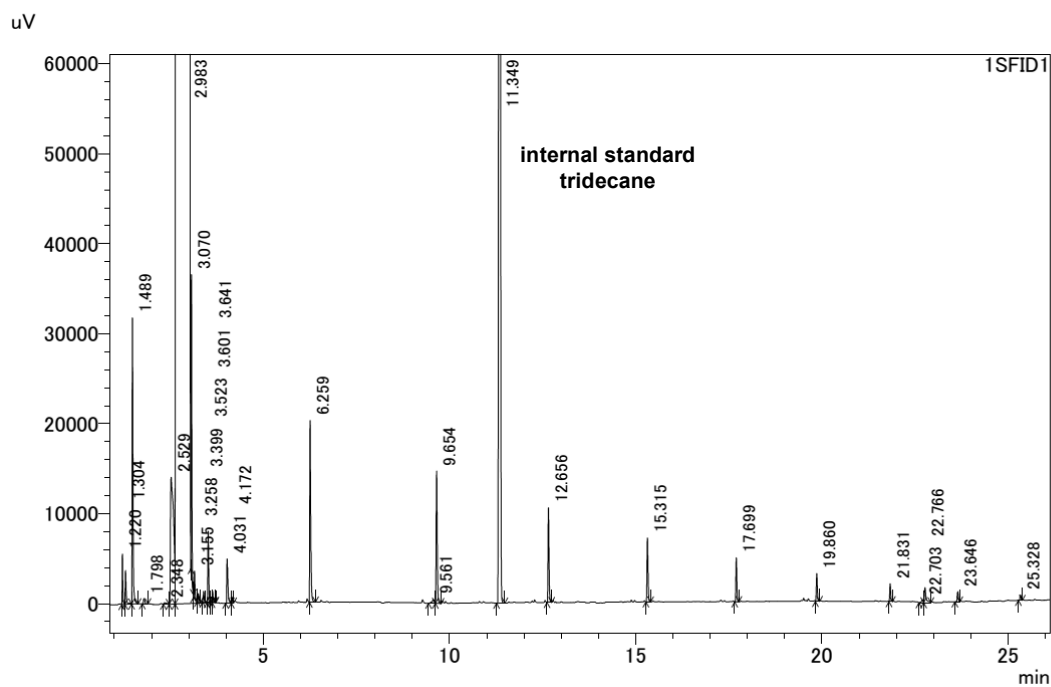

**Figure S61.** GC spectrum of ethylene oligomer obtained by **5b** at 30 °C with tridecane as internal standard (Table 1, entry 8).

## 5.2 Data of copolymers (Table 2)

### 5.2.1 Data of ethylene/allyl acetate copolymers

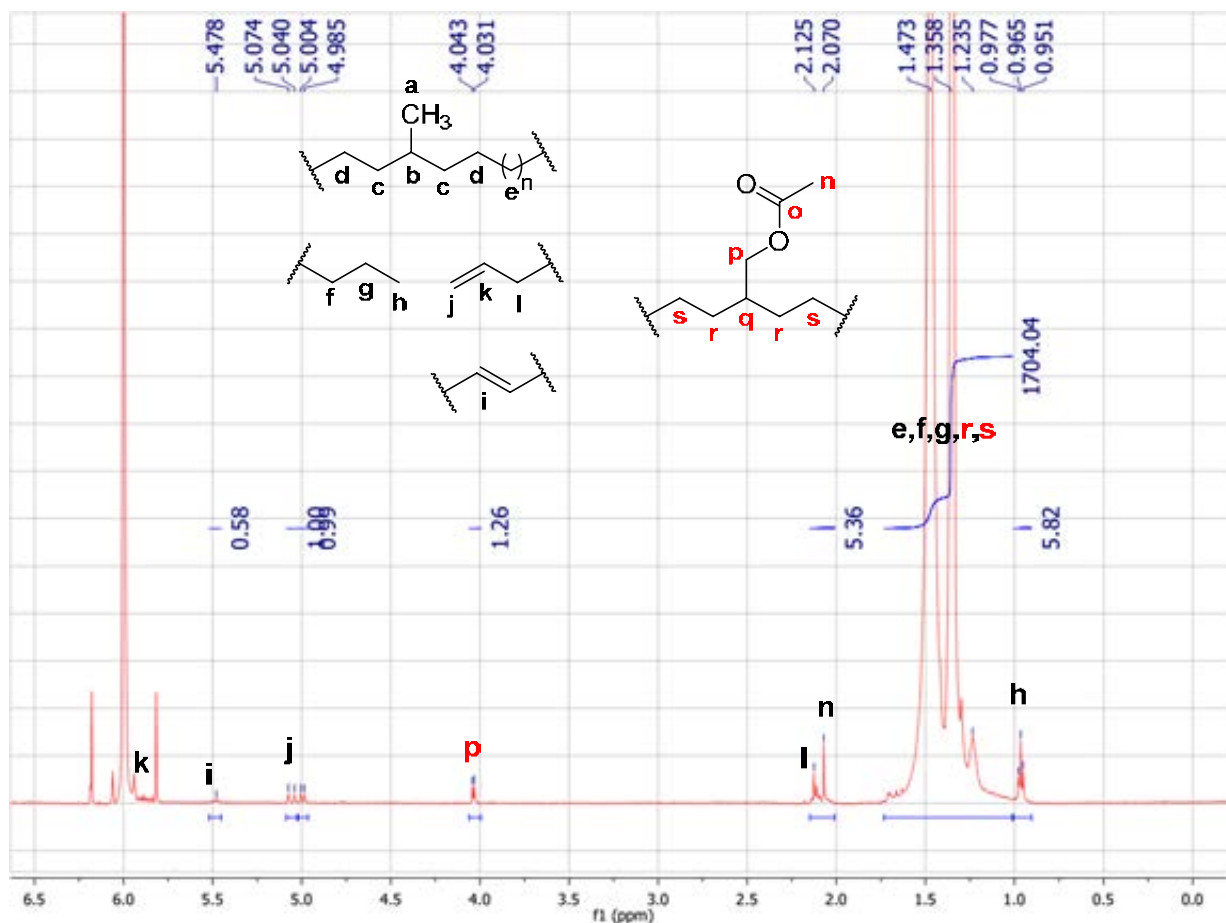

**Figure S62.** <sup>1</sup>H NMR spectrum (500 MHz, 1,1,2,2-tetrachloroethane-*d*<sub>2</sub>, 120 °C, relaxation delay 10 s) of copolymer with allyl acetate obtained by **4b** at 30 °C (Table 2, entry 1).

Note: Calculation of incorporation ratio of allyl acetate:

Assume (1-*x*) mol% ethylene and *x* mol% allyl acetate in the copolymer,

$$\frac{2x}{8x + 4(1 - x)} = \frac{p}{p + e + f + g + h + j + k + l + i + n + q + r + s}$$

$$x = \frac{2p}{e + f + g + h + j + k + l + i + n + q + r + s - p}$$

In entry 1 of Table 2, the incorporation ratio of allyl acetate is calculated as follows:

$$(2 \times 1.26) / (1704.04 + 5.82 + 5.36 + 3.00 + 0.58 - 1.26) = 0.15 \text{ mol\%}$$

タイトル:

&lt;表題部&gt;

|         |              |         |                       |
|---------|--------------|---------|-----------------------|
| サンプル名   | : twj-09-69  | 測定日時    | : 2016/10/06 03:16:28 |
| データベース名 | : 201602.mdb | 計算日時    | : 2016/10/06 10:23:47 |
| 保存データ名  | : RSLT0932   | シリアル番号  | : 932                 |
| リットデータ名 | : 20160820   | カブ番号    | :                     |
| 収集属性    | : 独立         | 収集時間[分] | : 0.00 - 35.00        |
| 計算Ch    | : Ch 1       | 計算方法    | : 分子量計算               |

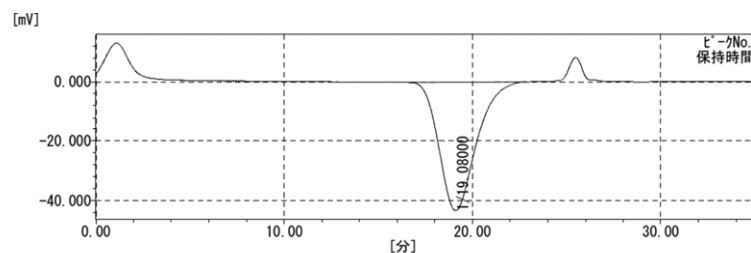

&lt;Ch1 分子量計算結果&gt;

| ピーク        | 1     | ベース          | ピーク     | [分] | [mV] | [MOL] | Mn     | Mw     | Mz     | Mz+1    | Mv     | Mp     | Mz/Mw | Mw/Mn | Mz+1/Mw |
|------------|-------|--------------|---------|-----|------|-------|--------|--------|--------|---------|--------|--------|-------|-------|---------|
| ピークスタート    | 16.52 | -0.138       | 399.844 |     |      |       | 21.669 | 49.300 | 79.751 | 111.487 | 49.300 | 47.600 | 1.618 | 2.275 | 2.261   |
| ピークトップ     | 19.08 | -43.399      | 45.680  |     |      |       |        |        |        |         |        |        |       |       |         |
| ピークエンド     | 22.71 | 0.018        | 569     |     |      |       |        |        |        |         |        |        |       |       |         |
| 面積[mV・秒]   |       | 5.526.720    |         |     |      |       |        |        |        |         |        |        |       |       |         |
| 面積比[%]     |       | 100.000      |         |     |      |       |        |        |        |         |        |        |       |       |         |
| 高さ[mV]     |       | 43.325       |         |     |      |       |        |        |        |         |        |        |       |       |         |
| [ $\eta$ ] |       | 49.299.52025 |         |     |      |       |        |        |        |         |        |        |       |       |         |

**Figure S63.** SEC chart of ethylene/allyl acetate copolymer obtained by **4b** (Table 2, entry 1).

$M_n$  (PS) = 22 kg/mol was corrected to  $M_n$  (PE) = 9.4 kg/mol by universal calibration.

モジュール: DSC  
 データ名: twj-09-69  
 測定日付: 2016/11/07  
 サンプル名: twj-09-69  
 サンプル質量: 4.895 mg  
 リファレンス名:  
 リファレンス質量: 0.000 mg

温度プログラム:  
 Cel Cel Cel/min min s  
 1\* 30 200 10 5 0.5  
 2\* 200 -50 10 30 0.5  
 3\* -50 200 10 5 0.5  
 4\* 200 30 10 5 0.5

コメント:  
 オペレータ: tao

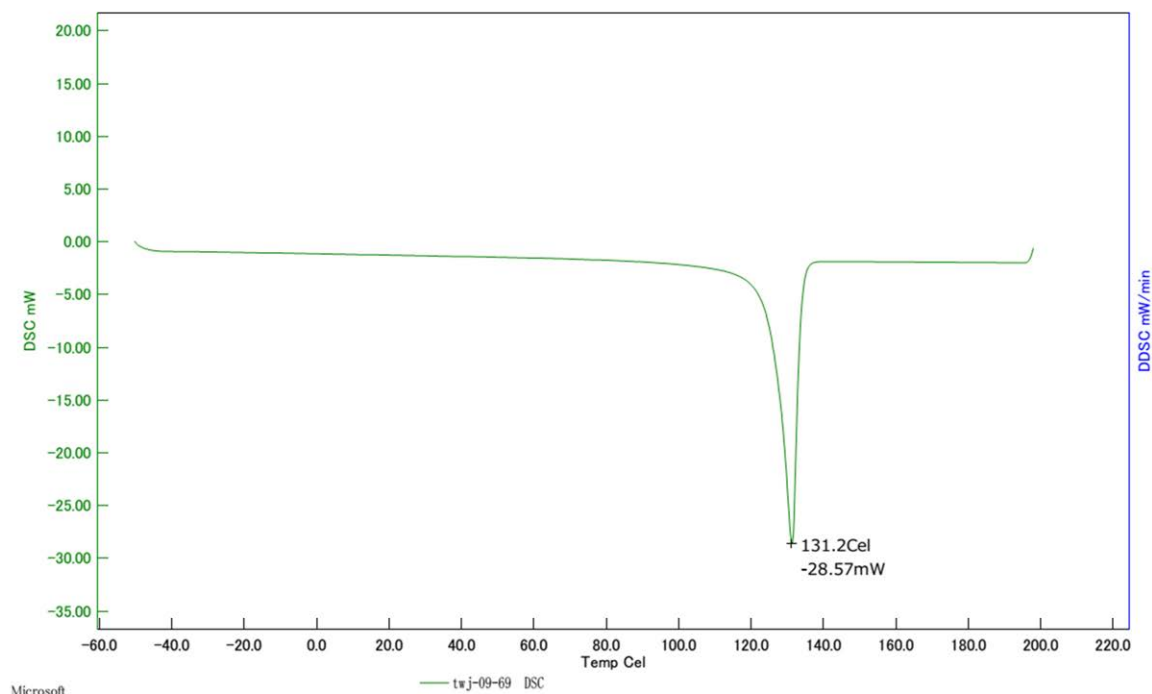

**Figure S64.** DSC traces of ethylene/allyl acetate copolymer obtained by **4b** (Table 2, entry 1).

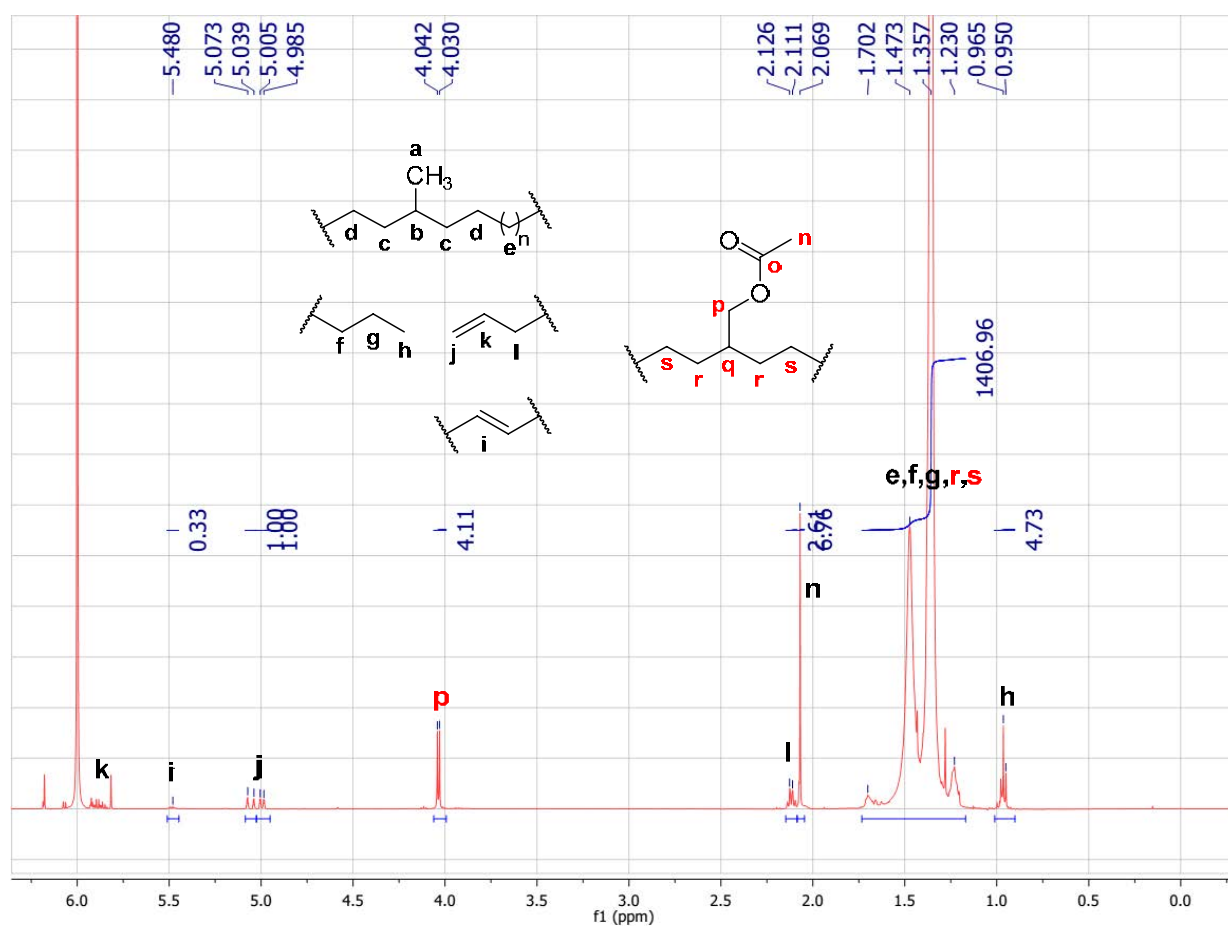

**Figure S65.**  $^1\text{H}$  NMR spectrum (500 MHz,  $1,1,2,2$ -tetrachloroethane- $d_2$ , 120  $^\circ\text{C}$ , relaxation delay 10 s) of copolymer with allyl acetate obtained by **4b** at 30  $^\circ\text{C}$  (Table 2, entry 2).

Note: In entry 2 of Table 2, the incorporation ratio of allyl acetate is calculated as follows:

$$(2 \times 4.11) / (4.73 + 1406.96 + 3.00 + 0.33 + 2.61 + 6.76 - 4.11) = 0.58 \text{ mol\%}$$



タイトル:

&lt;表題部&gt;

|         |              |         |                       |
|---------|--------------|---------|-----------------------|
| サンプル名   | : twj-09-70  | 測定日時    | : 2016/10/06 04:06:24 |
| データベース名 | : 201602.mdb | 計算日時    | : 2016/10/06 10:24:36 |
| 保存データ名  | : RSLT0933   | シリアル番号  | : 933                 |
| ノットデータ名 | : 20160820   | カブ番号    | :                     |
| 収集属性    | : 独立         | 収集時間[分] | : 0.00 - 35.00        |
| 計算Ch    | : Ch 1       | 計算方法    | : 分子量計算               |

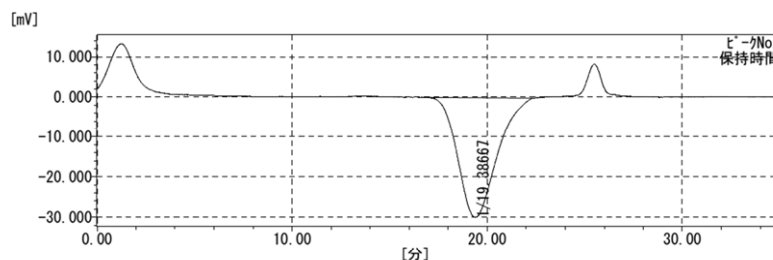

&lt;Ch1 分子量計算結果&gt;

| ピーク       | 1            | 2       | 3      | 4 |
|-----------|--------------|---------|--------|---|
| 時間 [分]    | 16.86        | 19.39   | 22.38  |   |
| [mV]      | -0.062       | -30.047 | -0.231 |   |
| [MOL]     | 308.067      | 33.941  | 940    |   |
| Mn        | 17,159       |         |        |   |
| Mw        | 38,014       |         |        |   |
| Mz        | 62,916       |         |        |   |
| Mz+1      | 88,924       |         |        |   |
| Mv        | 38,014       |         |        |   |
| Mp        | 36,713       |         |        |   |
| Mz/Mw     | 1.655        |         |        |   |
| Mw/Mn     | 2.215        |         |        |   |
| Mz+1/Mw   | 2.339        |         |        |   |
| 面積 [mV・秒] | 3,843.686    |         |        |   |
| 面積比 [%]   | 100.000      |         |        |   |
| 高さ [mV]   | 29.908       |         |        |   |
| [η]       | 38,013.80321 |         |        |   |

**Figure S66.** SEC chart of ethylene/allyl acetate copolymer obtained by **4b** (Table 2, entry 2).

$M_n$  (PS) = 17 kg/mol was corrected to  $M_n$  (PE) = 7.4 kg/mol by universal calibration.

|           |            |          |         |        |     |
|-----------|------------|----------|---------|--------|-----|
| モジュール:    | DSC        | 温度プログラム: |         | コメント:  |     |
| データ名:     | twj-09-70  | 1*       | 30 200  | オペレータ: | tao |
| 測定日付:     | 2016/11/08 | 2*       | 200 -50 |        |     |
| サンプル名:    | twj-09-70  | 3*       | -50 200 |        |     |
| サンプル質量:   | 2.702 mg   | 4*       | 200 30  |        |     |
| リファレンス名:  |            |          |         |        |     |
| リファレンス質量: | 0.000 mg   |          |         |        |     |

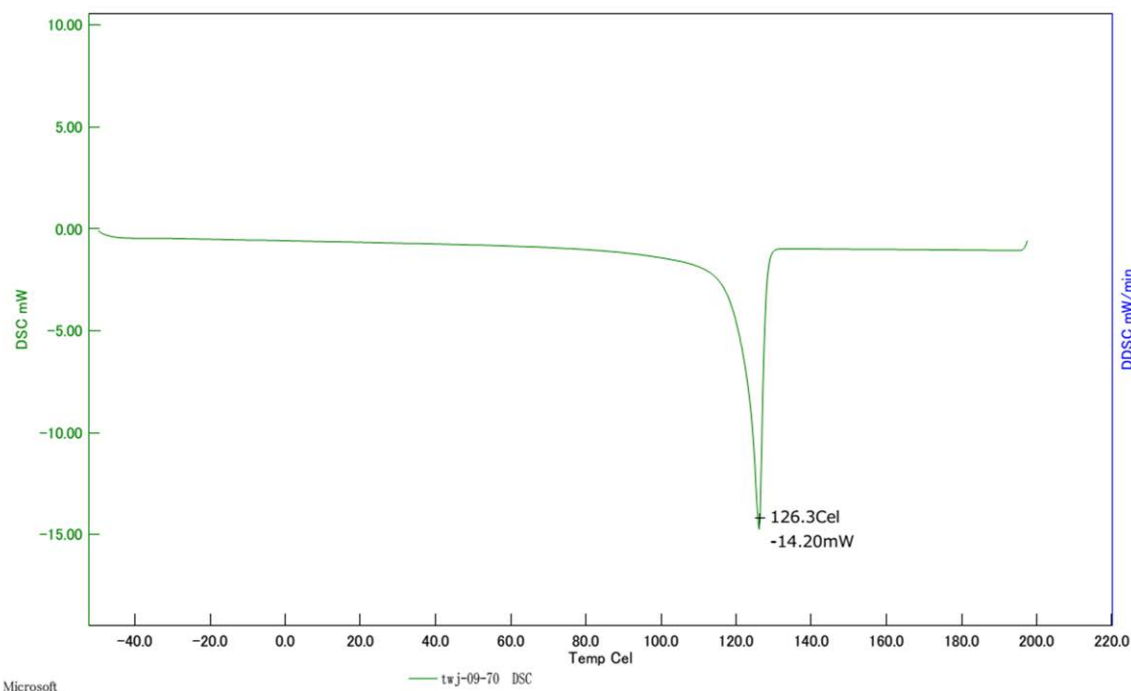

**Figure S67.** DSC traces of ethylene/allyl acetate copolymer obtained by **4b** (Table 2, entry 2).

### 5.2.2. Data of ethylene/methyl acrylate copolymers

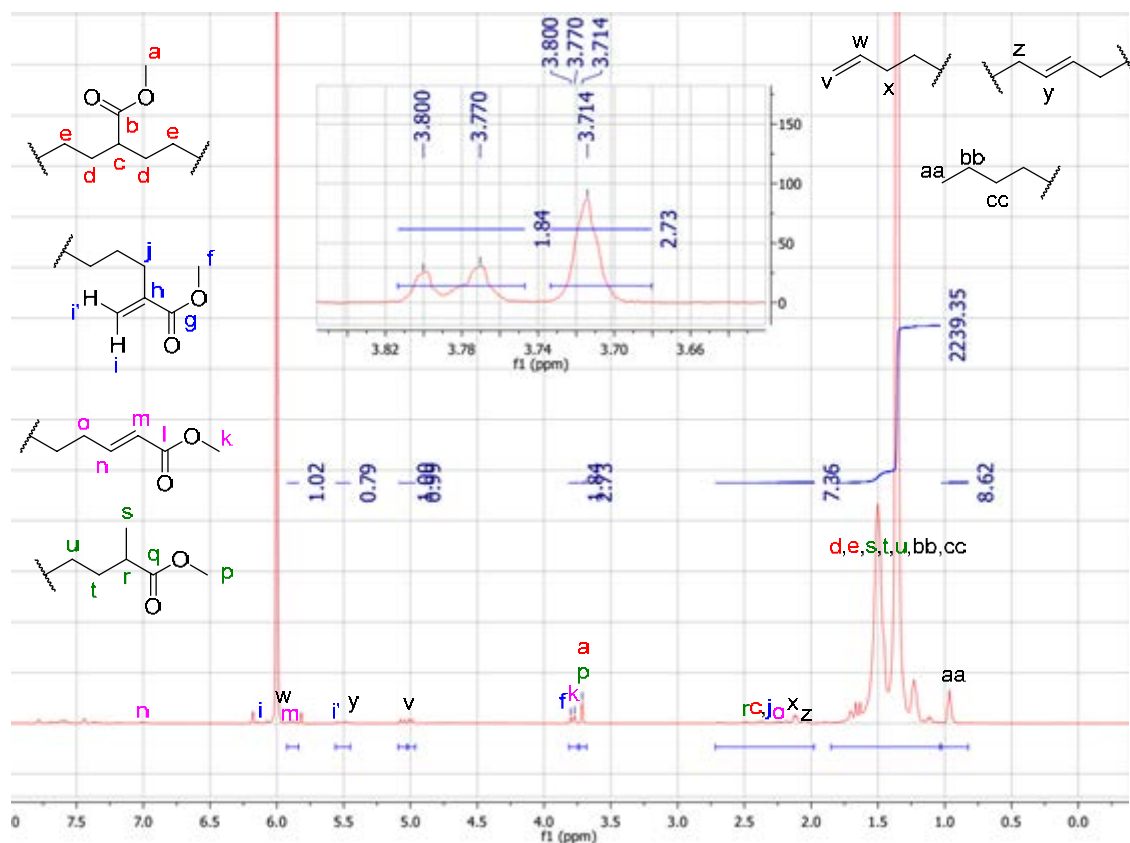

**Figure S68.** <sup>1</sup>H NMR spectrum (500 MHz, 1,1,2,2-tetrachloroethane-*d*<sub>2</sub>, 120 °C, relaxation delay 10 s) of copolymer with methyl acrylate obtained by **4b** at 30 °C (Table 2, entry 3).

Note: Calculation of incorporation ratio of methyl acrylate:

Assume (1-*x*) mol% ethylene and *x* mol% methyl acrylate in the copolymer,

$$\frac{3x}{3x + 4(1-x)} = \frac{p + a + f + k}{n + i + i' + m + y + v + w + r + c + j + o + x + z + d + e + s + t + u + bb + cc + aa}$$

$$= \frac{4(p + a + f + k)}{3(n + i + i' + m + y + v + w + r + c + j + o + x + z + d + e + s + t + u + bb + cc + aa) + p + a + f + k}$$

In entry 3 of Table 2, the incorporation ratio of allyl acetate is calculated as follows:

$$(4 \times (1.84 + 2.73)) / (3 \times (8.62 + 2239.35 + 7.36 + 3.02 + 0.79) + 1.84 + 2.73) = 0.27 \text{ mol\%}.$$

タイトル:

&lt;表題部&gt;

サンプル名 : twj-09-75  
 データベース名 : 201602.mdb  
 保存データ名 : RSLT0934  
 マットデータ名 : 20160820  
 収集属性 : 独立  
 計算Ch : Ch 1

測定日時 : 2016/10/06 04:56:20  
 計算日時 : 2016/10/06 10:25:26  
 シリアル番号 : 934  
 カップ番号 :  
 収集時間[分] : 0.00 - 35.00  
 計算方法 : 分子量計算

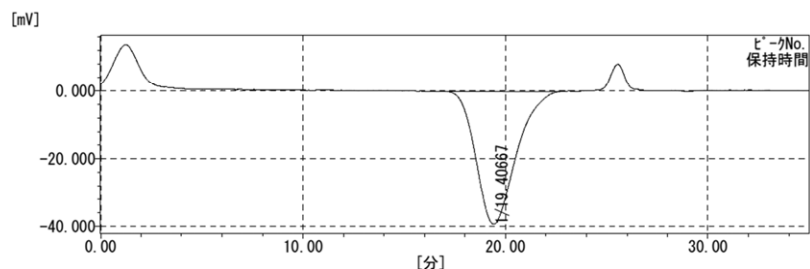

&lt;Ch1 分子量計算結果&gt;

| ピーク      | 1            | ピーク     |
|----------|--------------|---------|
| [分]      | [mV]         | [MOL]   |
| ピークスタート  | 17.01        | -0.194  |
| ピークトップ   | 19.41        | -39.429 |
| ピークエンド   | 22.71        | -0.261  |
| 面積[mV・秒] | 4,943.082    | 272.841 |
| 面積比[%]   | 100.000      | 33.278  |
| 高さ[mV]   | 39.207       | 569     |
| [η]      | 36,405.10065 |         |

Mn : 16,094  
 Mw : 36,405  
 Mz : 59,675  
 Mz+1 : 83,630  
 Mv : 36,405  
 Mp : 35,651  
 Mz/Mw : 1.639  
 Mw/Mn : 2.262  
 Mz+1/Mw : 2.297

**Figure S69.** SEC chart of ethylene/methyl acrylate copolymer obtained by **4b** (Table 2, entry 3).

$M_n$  (PS) = 16 kg/mol was corrected to  $M_n$  (PE) = 7.0 kg/mol by universal calibration.

モジュール: DSC  
 データ名: twj-09-75  
 測定日付: 2016/11/09  
 サンプル名: twj-09-75  
 サンプル質量: 4.012 mg  
 リファレンス名:  
 リファレンス質量: 0.000 mg

温度プログラム:  

|    | Cel | Cel | Cel/min | min | s   |
|----|-----|-----|---------|-----|-----|
| 1* | 30  | 200 | 10      | 5   | 0.5 |
| 2* | 200 | -50 | 10      | 30  | 0.5 |
| 3* | -50 | 200 | 10      | 5   | 0.5 |
| 4* | 200 | 30  | 10      | 5   | 0.5 |

コメント:  
 オペレータ: tao

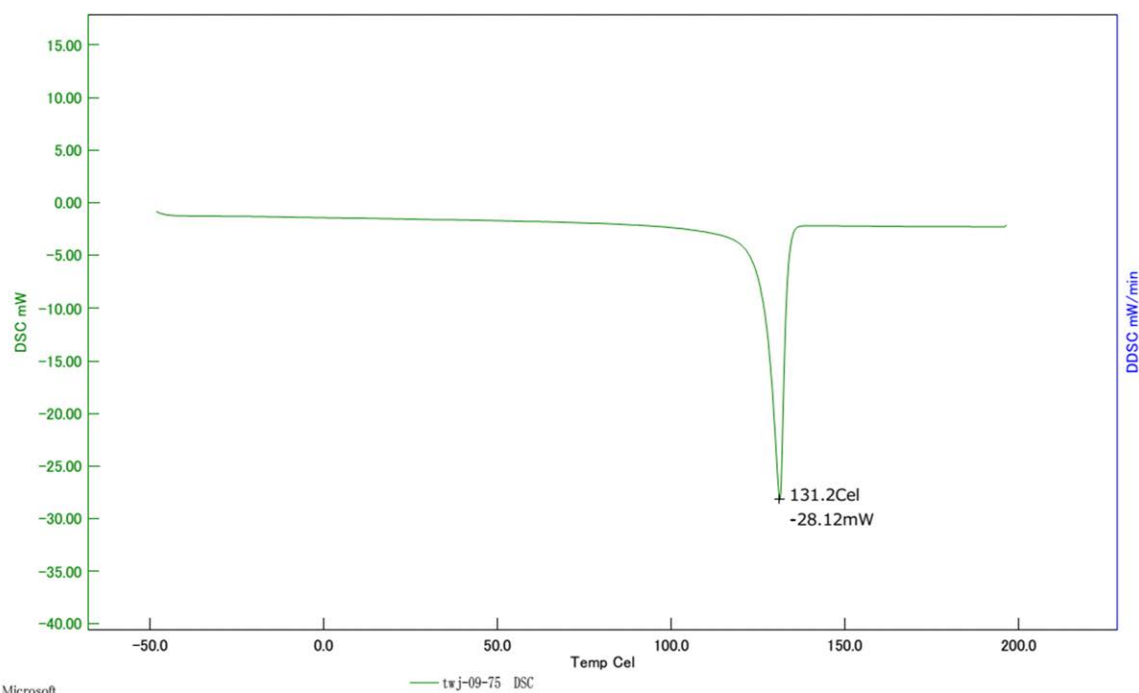

**Figure S70.** DSC traces of ethylene/methyl acrylate copolymer obtained by **4b** (Table 2, entry 3).

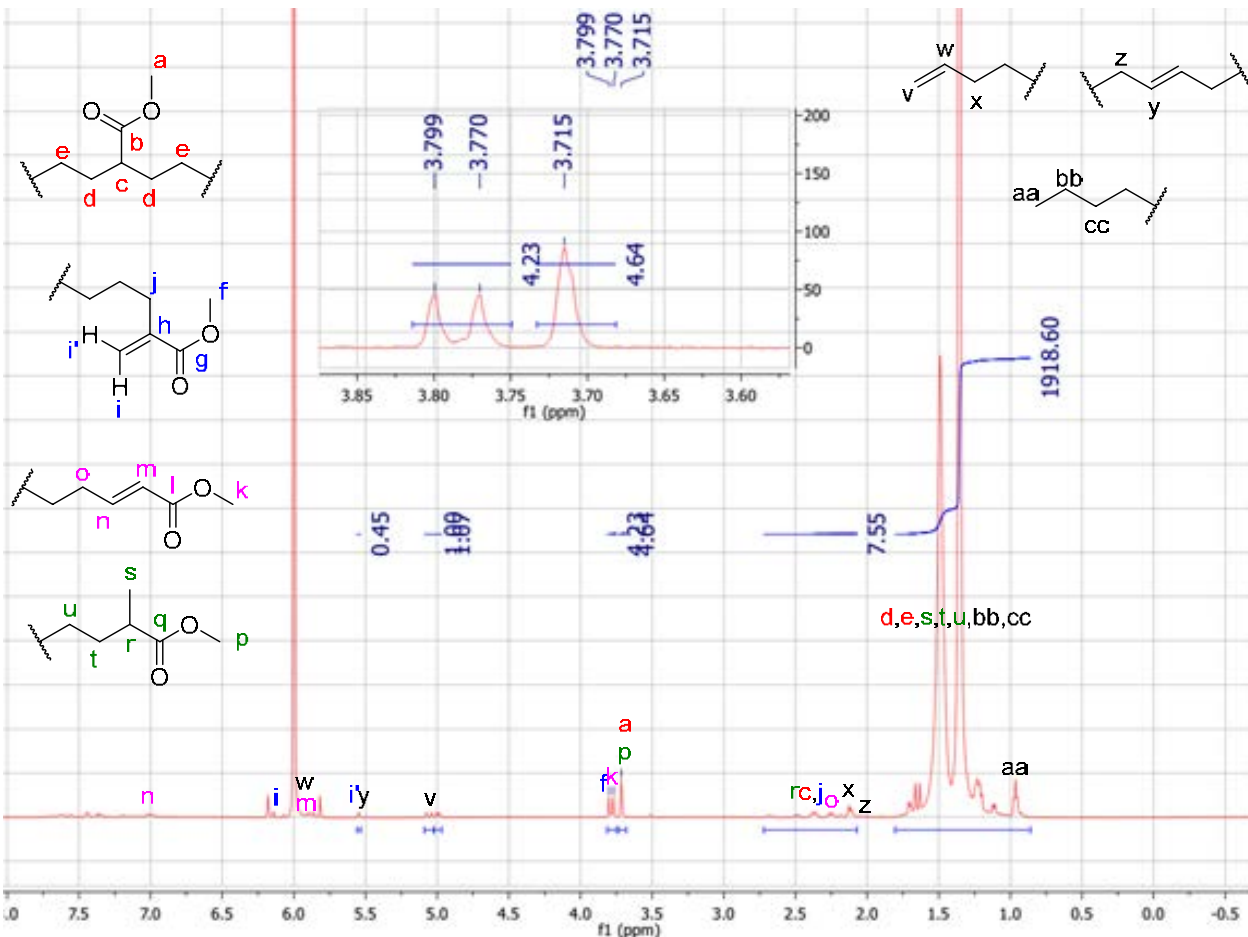

**Figure S71.**  $^1\text{H}$  NMR spectrum (500 MHz, 1,1,2,2-tetrachloroethane- $d_2$ , 120  $^\circ\text{C}$ , relaxation delay 10 s) of copolymer with methyl acrylate obtained by **4b** at 30  $^\circ\text{C}$  (Table 2, entry 4).

Note: In entry 3 of Table 2, the incorporation ratio of allyl acetate is calculated as follows:

$$(4 \times (4.23 + 4.64)) / (3 \times (1918.60 + 7.55 + 3.00 + 0.45 + 0.45) + 4.23 + 4.64) = 0.61 \text{ mol\%}$$

C:\GPC\Database\201602.mdb RSLT0935 twj-09-76 Thursday, Oct 6 2016

タイトル:  
 <表題部>  
 サンプル名 : twj-09-76 測定日時 : 2016/10/06 05:46:25  
 データベース名 : 201602.mdb 計算日時 : 2016/10/06 10:26:28  
 保存データ名 : RSLT0935 シリアル番号 : 935  
 マットデータ名 : 20160820 カップ番号 :  
 収集属性 : 独立 収集時間[分] : 0.00 - 35.00  
 計算Ch : Ch 1 計算方法 : 分子量計算

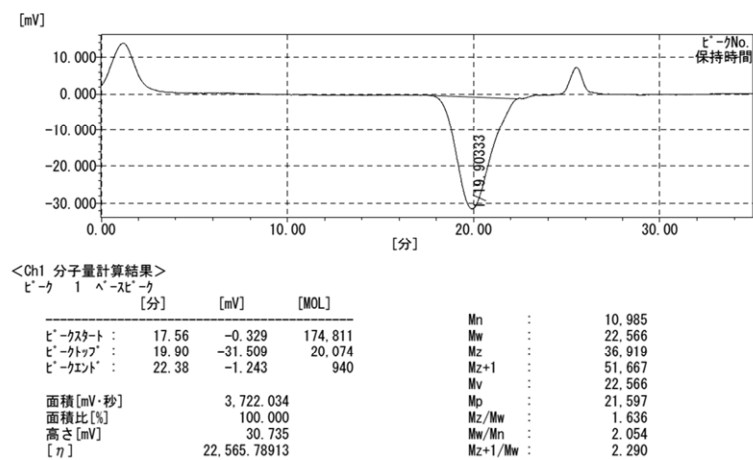

**Figure S72.** SEC chart of ethylene/methyl acrylate copolymer obtained by **4b** (Table 2, entry 4).  
 $M_n$  (PS) = 11 kg/mol was corrected to  $M_n$  (PE) = 4.8 kg/mol by universal calibration.

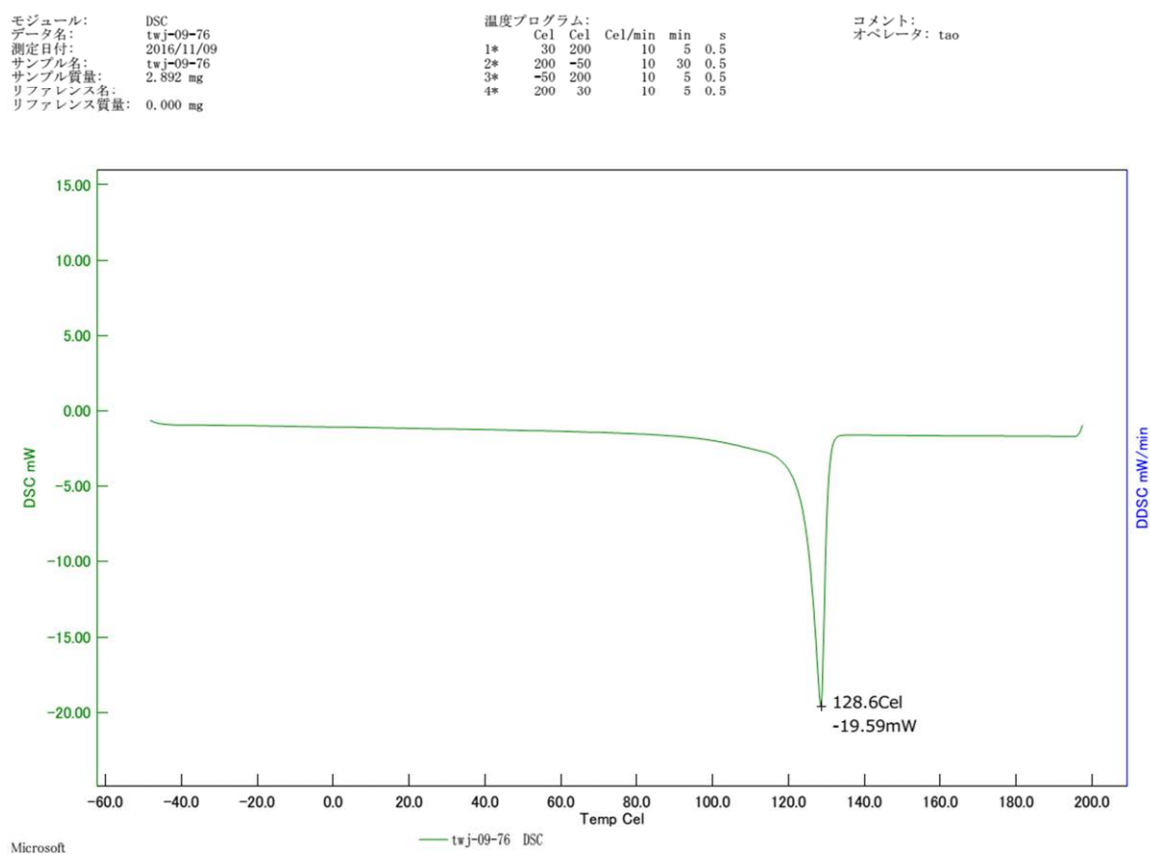

**Figure S73.** DSC traces of ethylene/methyl acrylate copolymer obtained by **4b** (Table 2, entry 4).

## Supplementary Information for the Assignment of Ethylene/Methyl Acrylate Copolymer

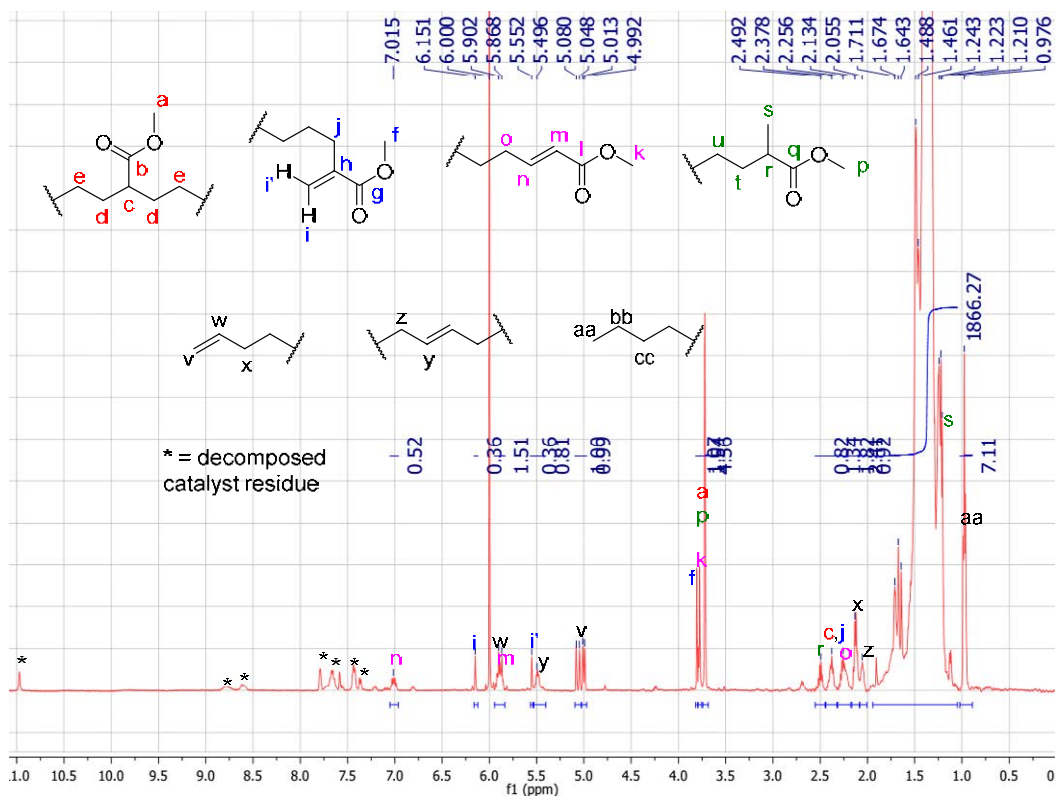

**Figure S74.**  $^1\text{H}$  NMR spectrum (500 MHz,  $1,1,2,2$ -tetrachloroethane- $d_2$ ,  $120^\circ\text{C}$ , relaxation delay 10 s) of ethylene/methyl acrylate copolymer obtained by **4b** at  $30^\circ\text{C}$  (Table S2, entry 5).

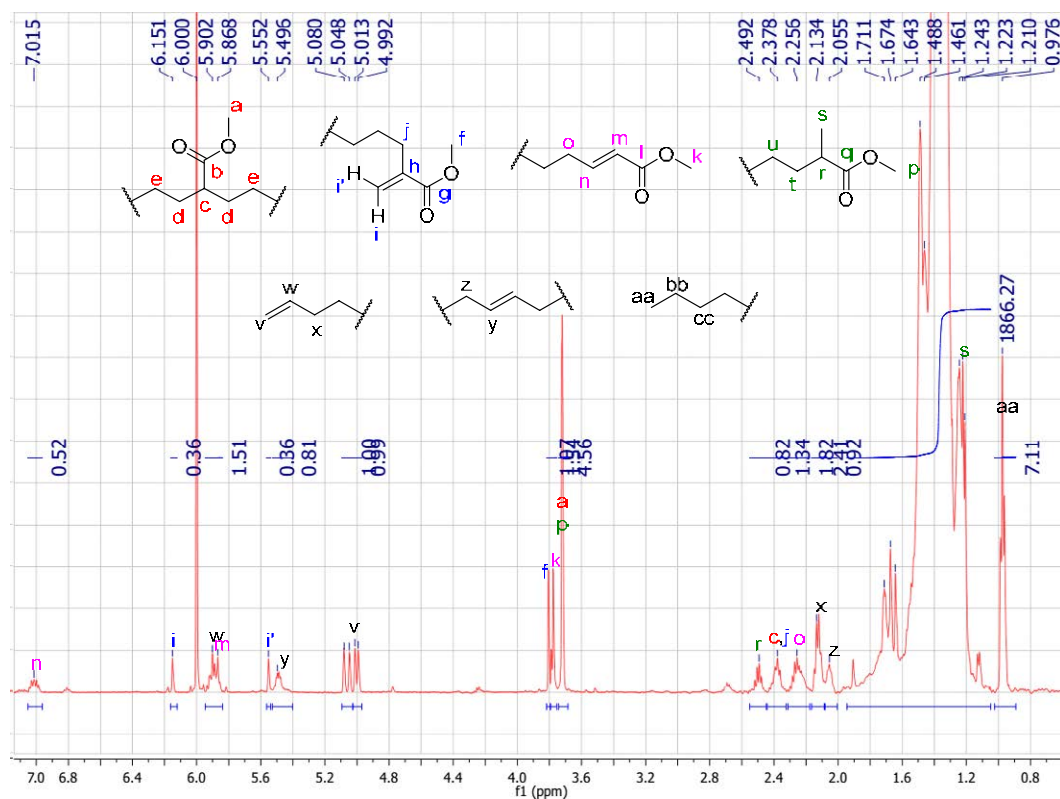

**Figure S75.**  $^1\text{H}$  NMR spectrum (500 MHz,  $1,1,2,2$ -tetrachloroethane- $d_2$ ,  $120^\circ\text{C}$ , relaxation delay 10 s,  $\delta = 0.5$ – $7.1$  ppm) of ethylene/methyl acrylate copolymer obtained by **4b** at  $30^\circ\text{C}$  (Table S2, entry 5).

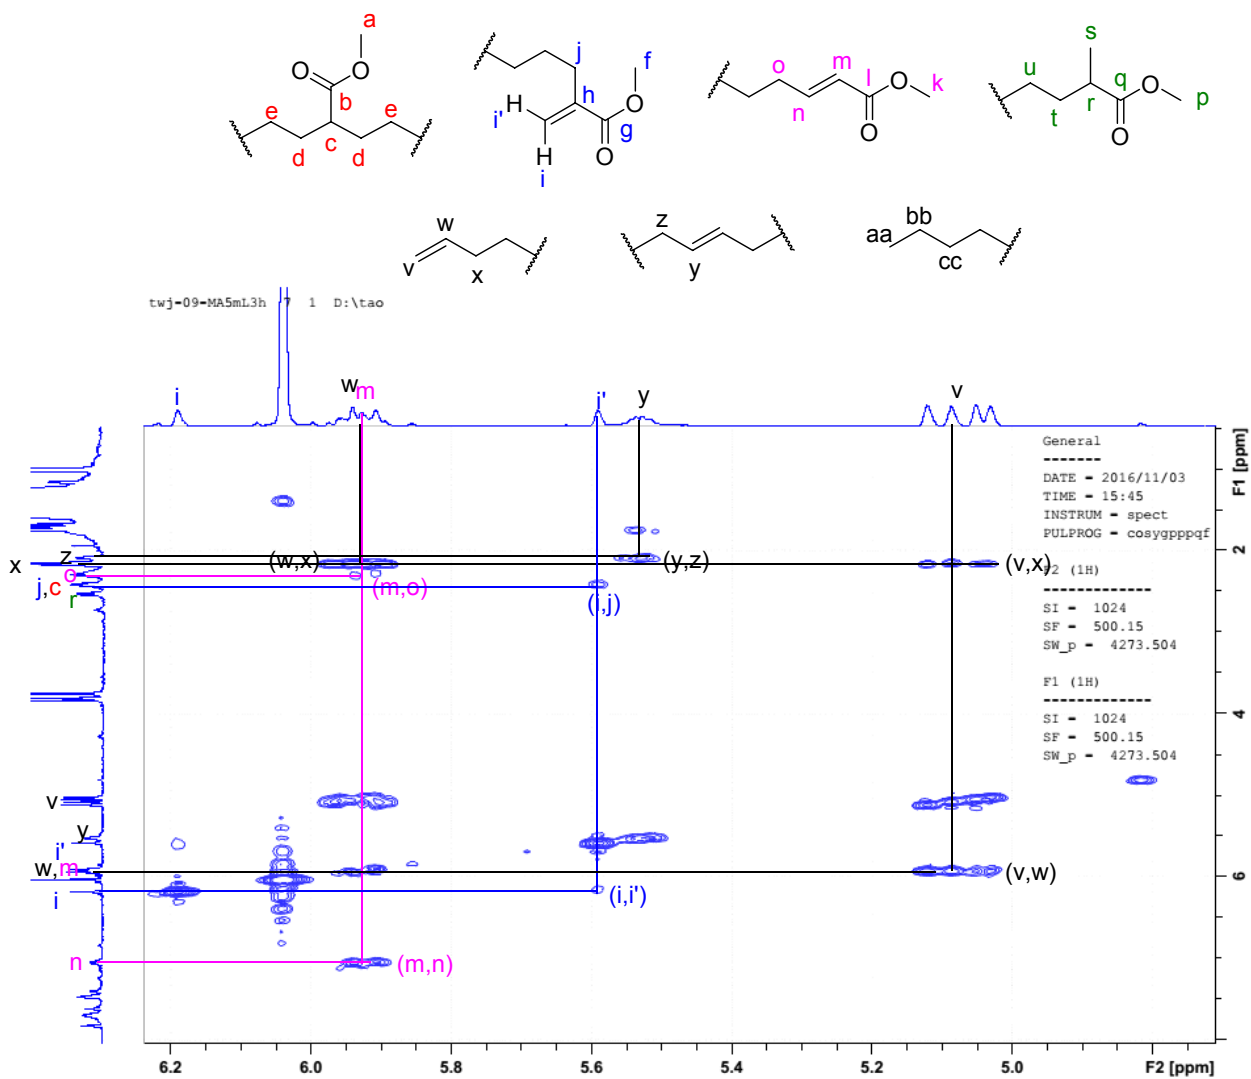

**Figure S76.**  $^1\text{H}$ - $^1\text{H}$  COSY spectrum (1,1,2,2-tetrachloroethane- $d_2$ , 120  $^\circ\text{C}$ ,  $\delta$  4.5-6.3 ppm) of ethylene/methyl acrylate copolymer obtained by **4b** at 30  $^\circ\text{C}$  (Table S2, entry 5).

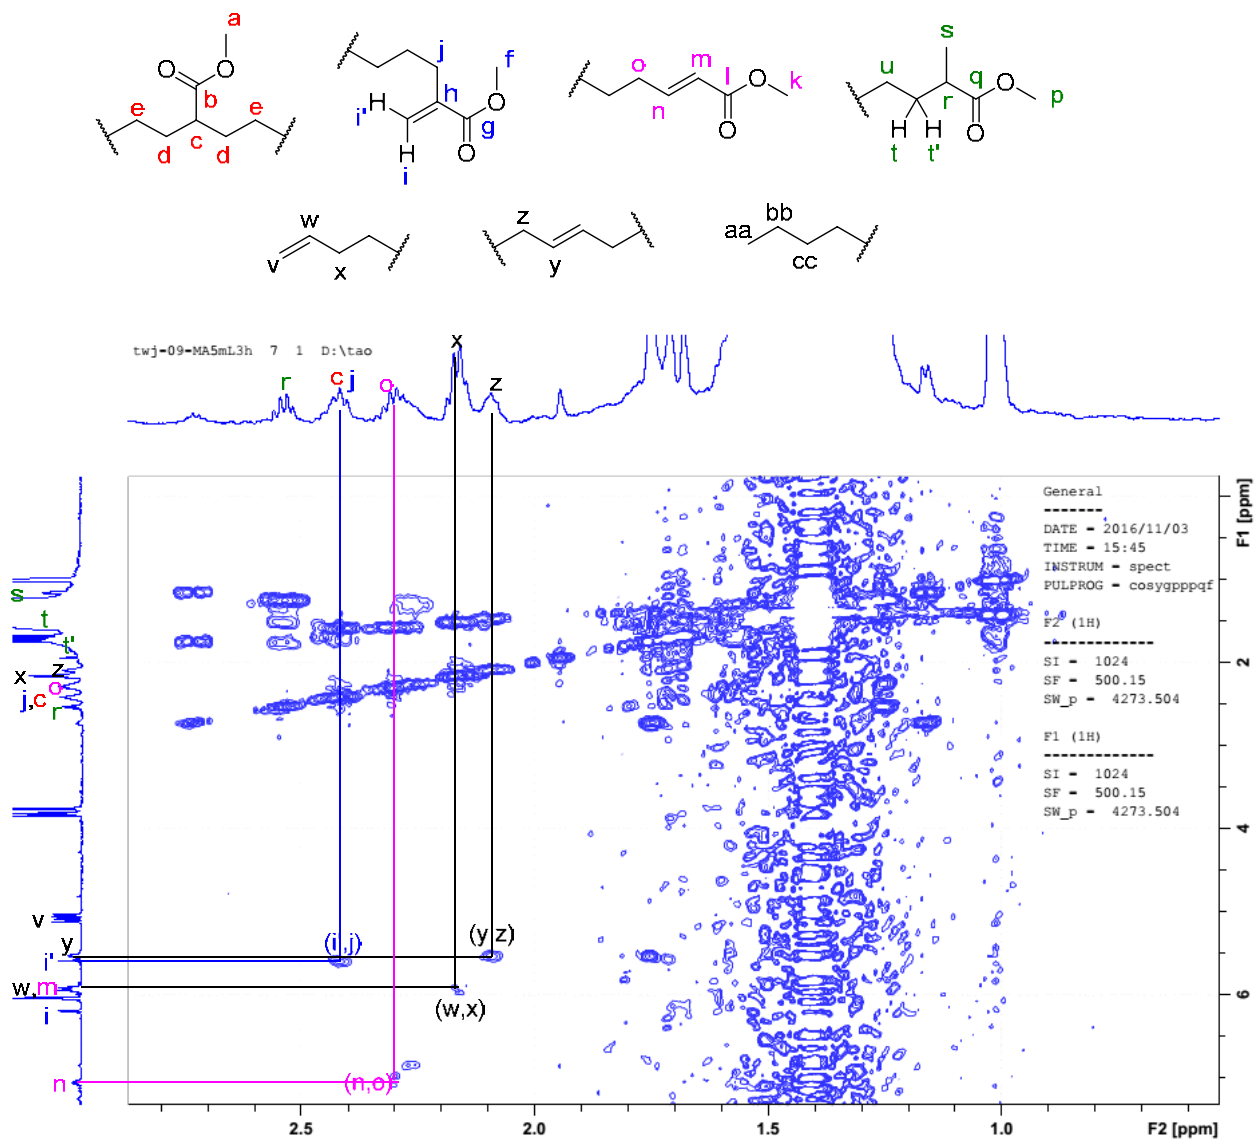

**Figure S77.**  $^1\text{H}$ - $^1\text{H}$  COSY spectrum (1,1,2,2-tetrachloroethane- $d_2$ , 120  $^\circ\text{C}$ ,  $\delta$  0.5–3.0 ppm) of ethylene/methyl acrylate copolymer obtained by **4b** at 30  $^\circ\text{C}$  (Table S2, entry 5).



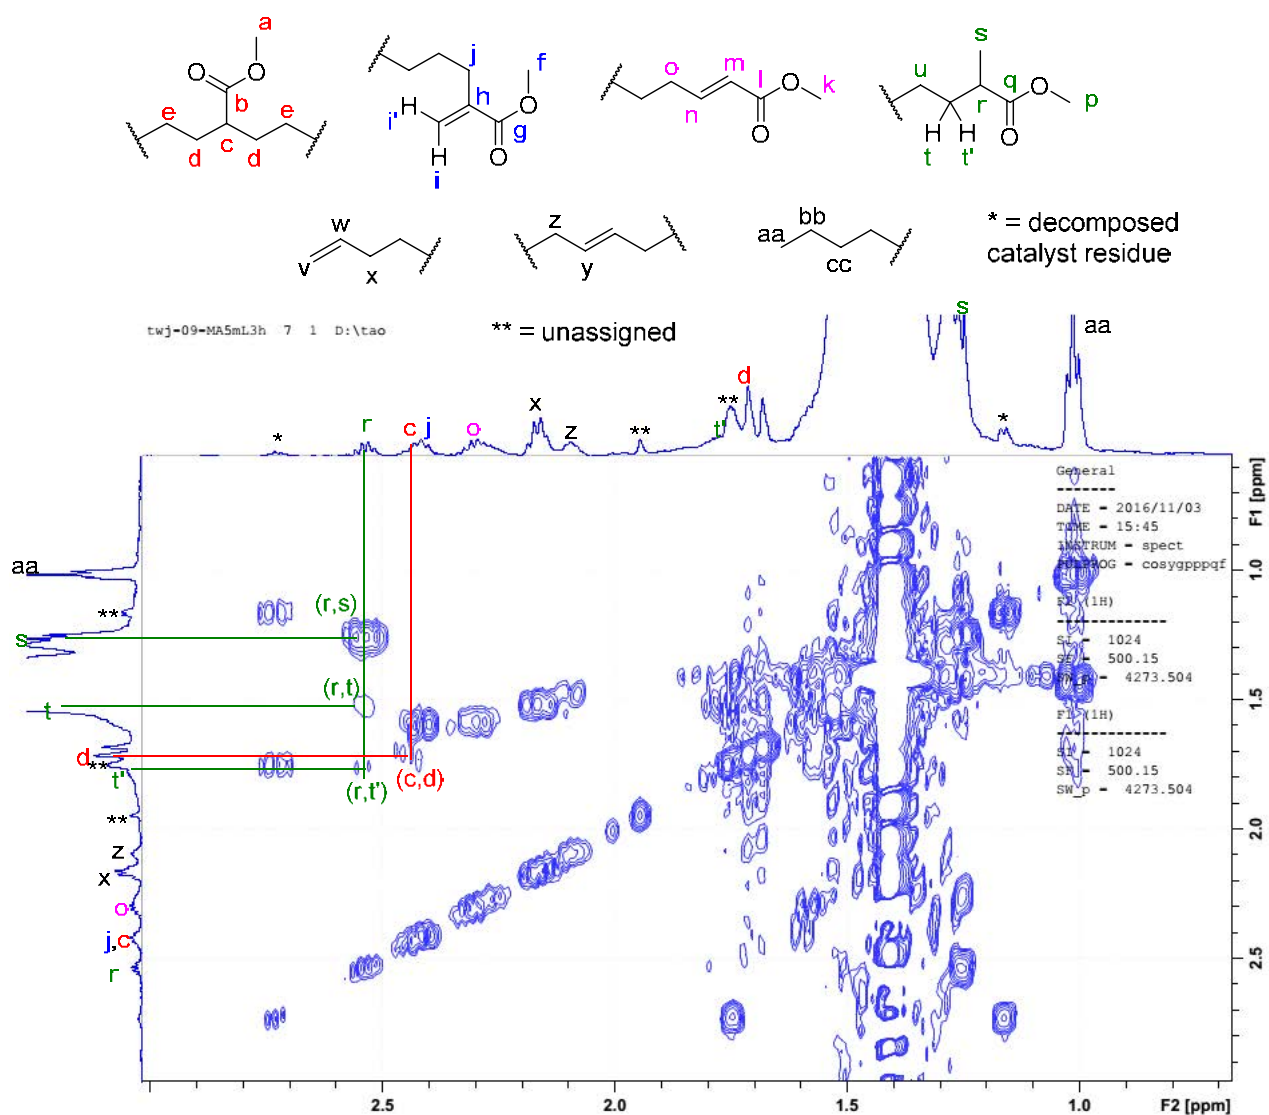

**Figure S78.**  $^1\text{H}$ - $^1\text{H}$  COSY spectrum (1,1,2,2-tetrachloroethane- $d_2$ , 120  $^\circ\text{C}$ ,  $\delta$  0.5-3.0 ppm) of ethylene/methyl acrylate copolymer obtained by **4b** at 30  $^\circ\text{C}$  (Table S2, entry 5).

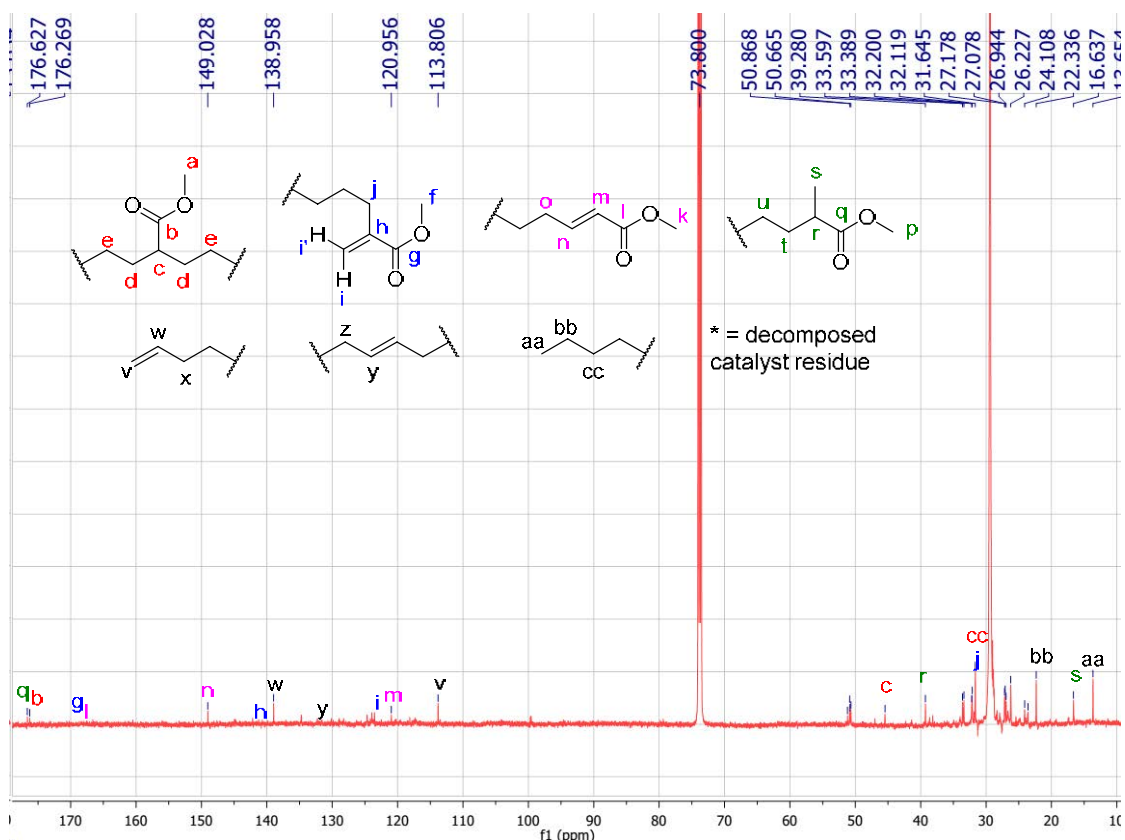

**Figure S79.** <sup>13</sup>C NMR spectrum (1,1,2,2-tetrachloroethane-*d*<sub>2</sub>, 120 °C) of ethylene/methyl acrylate copolymer obtained by **4b** at 30 °C (Table S2, entry 5).

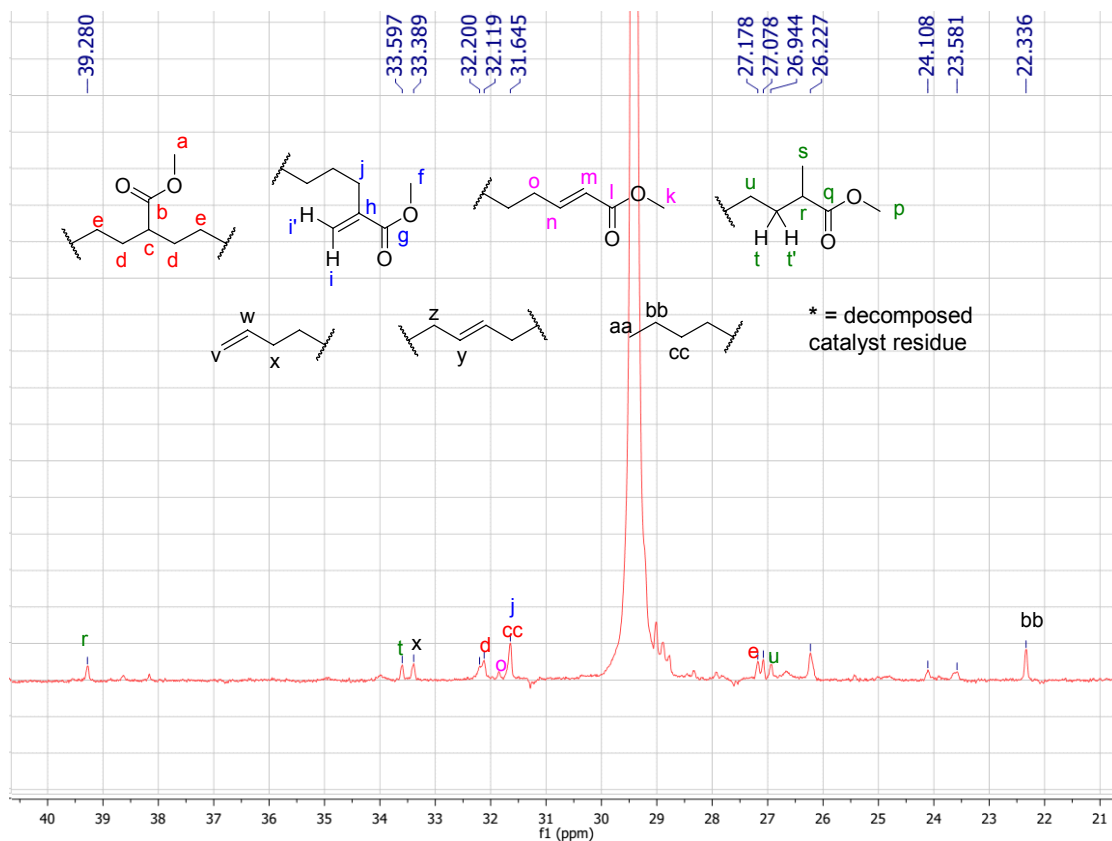

**Figure S80.** <sup>13</sup>C NMR spectrum (1,1,2,2-tetrachloroethane-*d*<sub>2</sub>, 120 °C) of ethylene/methyl acrylate copolymer obtained by **4b** at 30 °C (Table S2, entry 5).

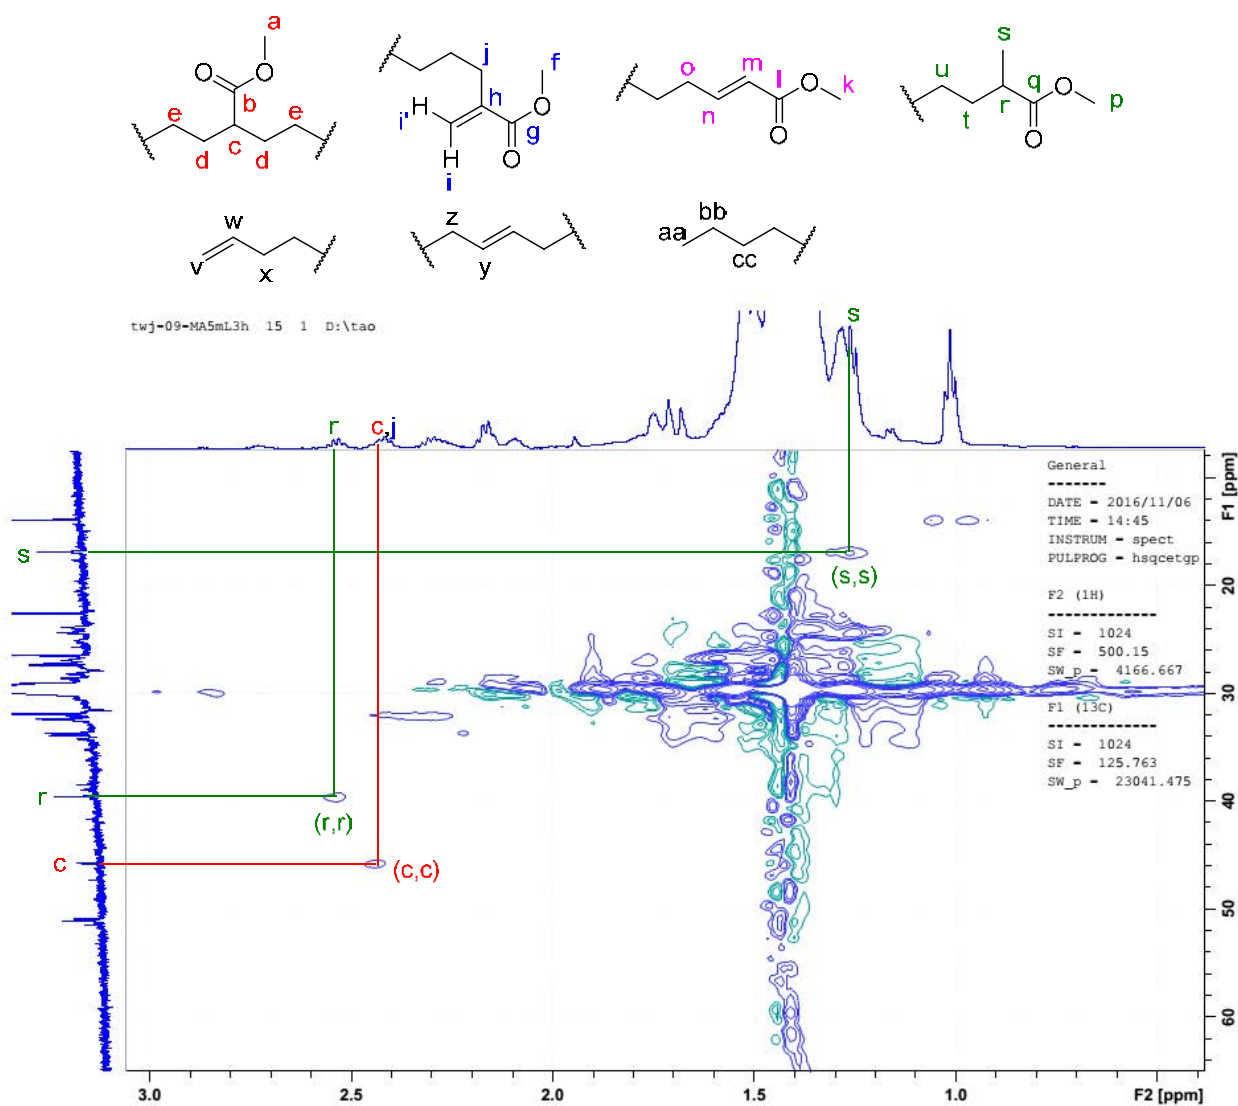

**Figure S81.** HSQC spectrum (1,1,2,2-tetrachloroethane- $d_2$ , 120 °C,  $\delta$  0.5–3.0 ppm) of ethylene/methyl acrylate copolymer obtained by **4b** at 30 °C (Table S2, entry 5).

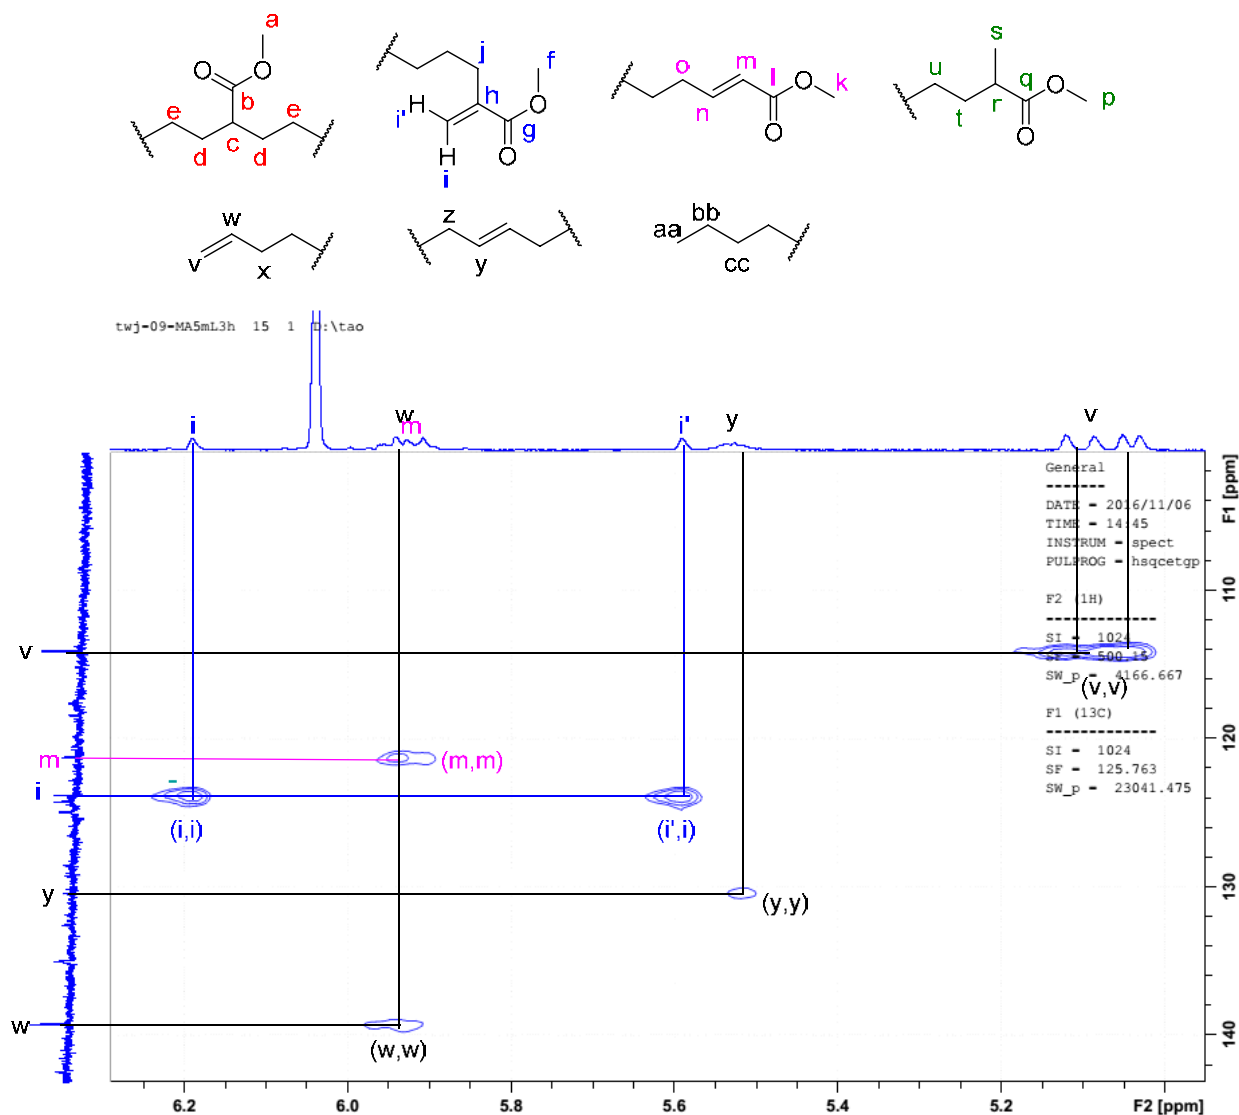

**Figure S82.** HSQC spectrum (1,1,2,2-tetrachloroethane- $d_2$ , 120 °C,  $\delta$  5.0–6.3 ppm) of ethylene/methyl acrylate copolymer obtained by **4b** at 30 °C (Table S2, entry 5).

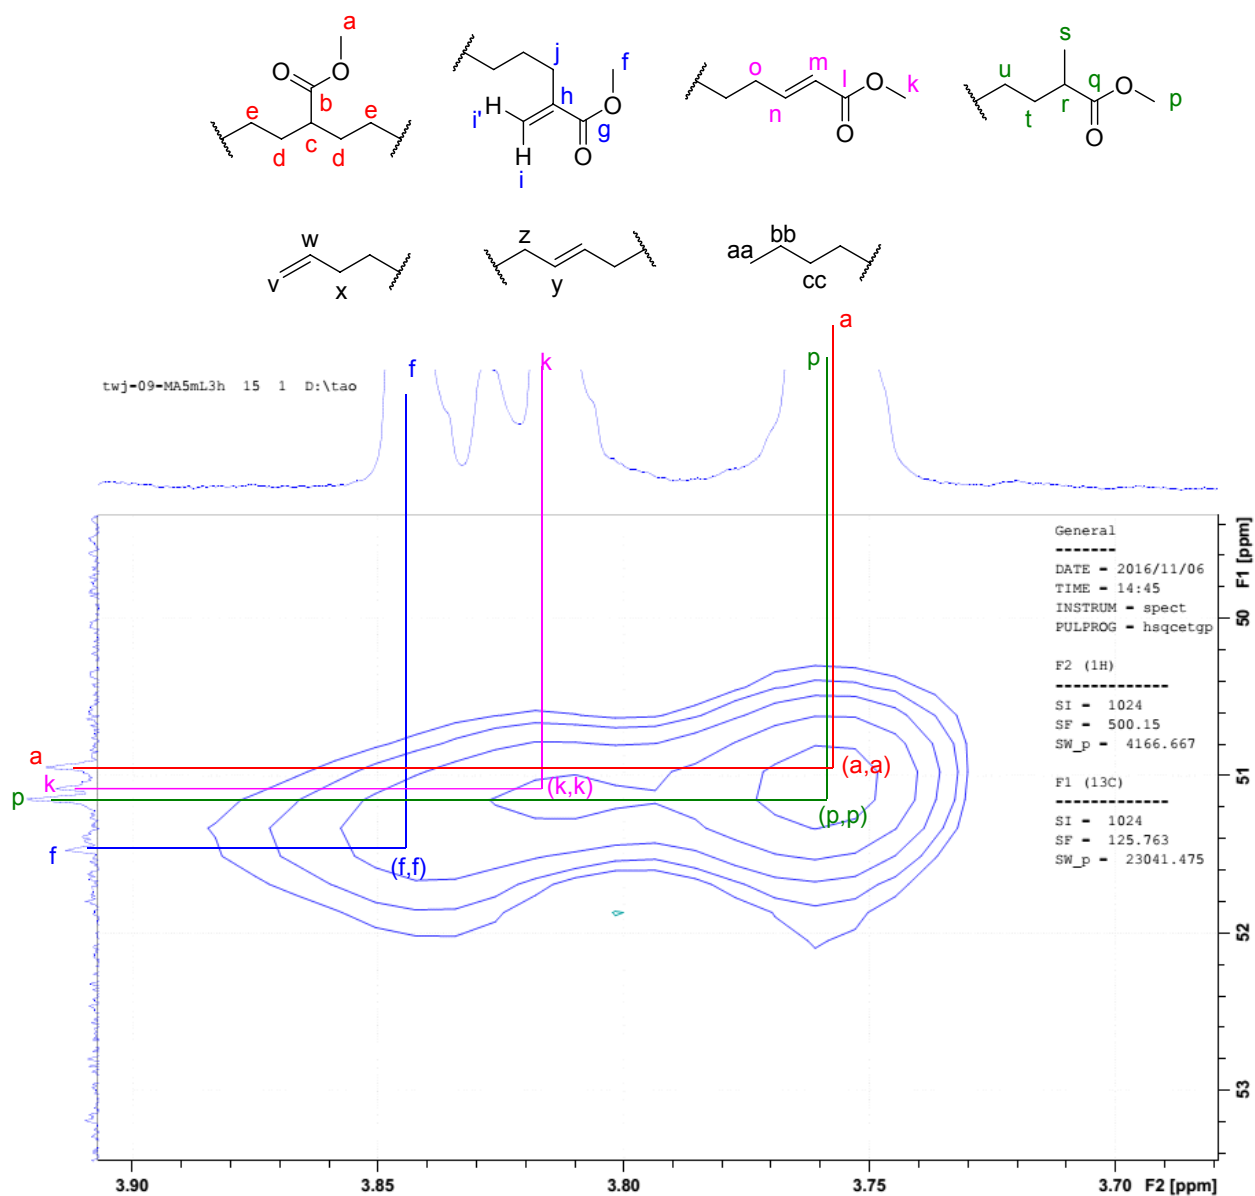

**Figure S83.** HSQC spectrum (1,1,2,2-tetrachloroethane-*d*<sub>2</sub>, 120 °C, δ 3.70–3.90 ppm) of ethylene/methyl acrylate copolymer obtained by **4b** at 30 °C (Table S2, entry 5).

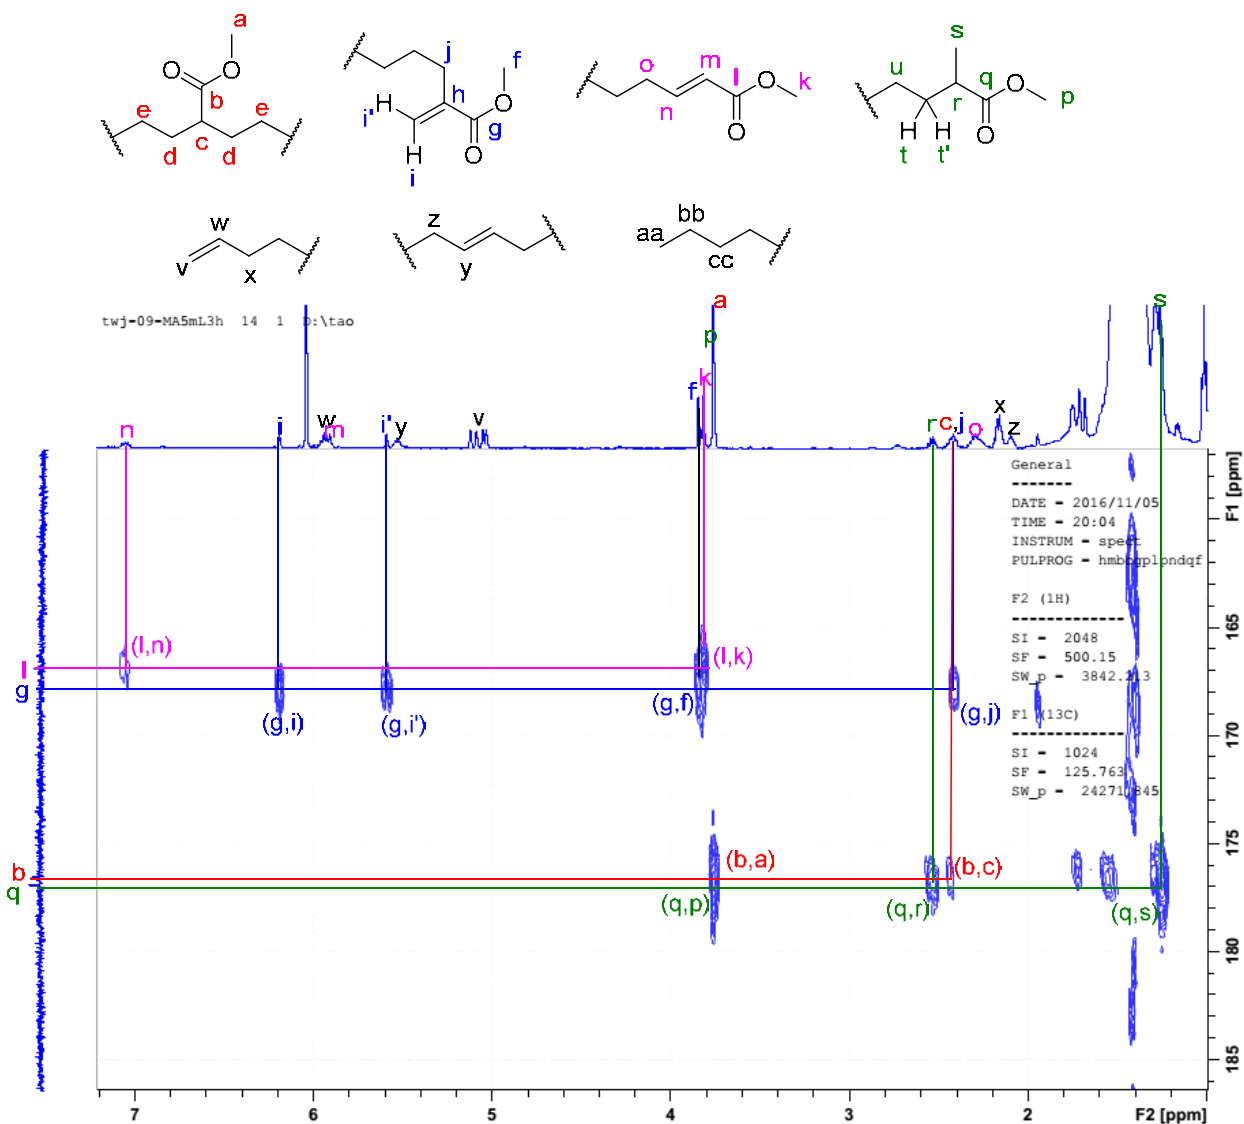

**Figure S84.** HMBC spectrum (1,1,2,2-tetrachloroethane- $d_2$ , 120 °C,  $\delta$  160–185 ppm) of ethylene/methyl acrylate copolymer obtained by **4b** at 30 °C (Table S2, entry 5).

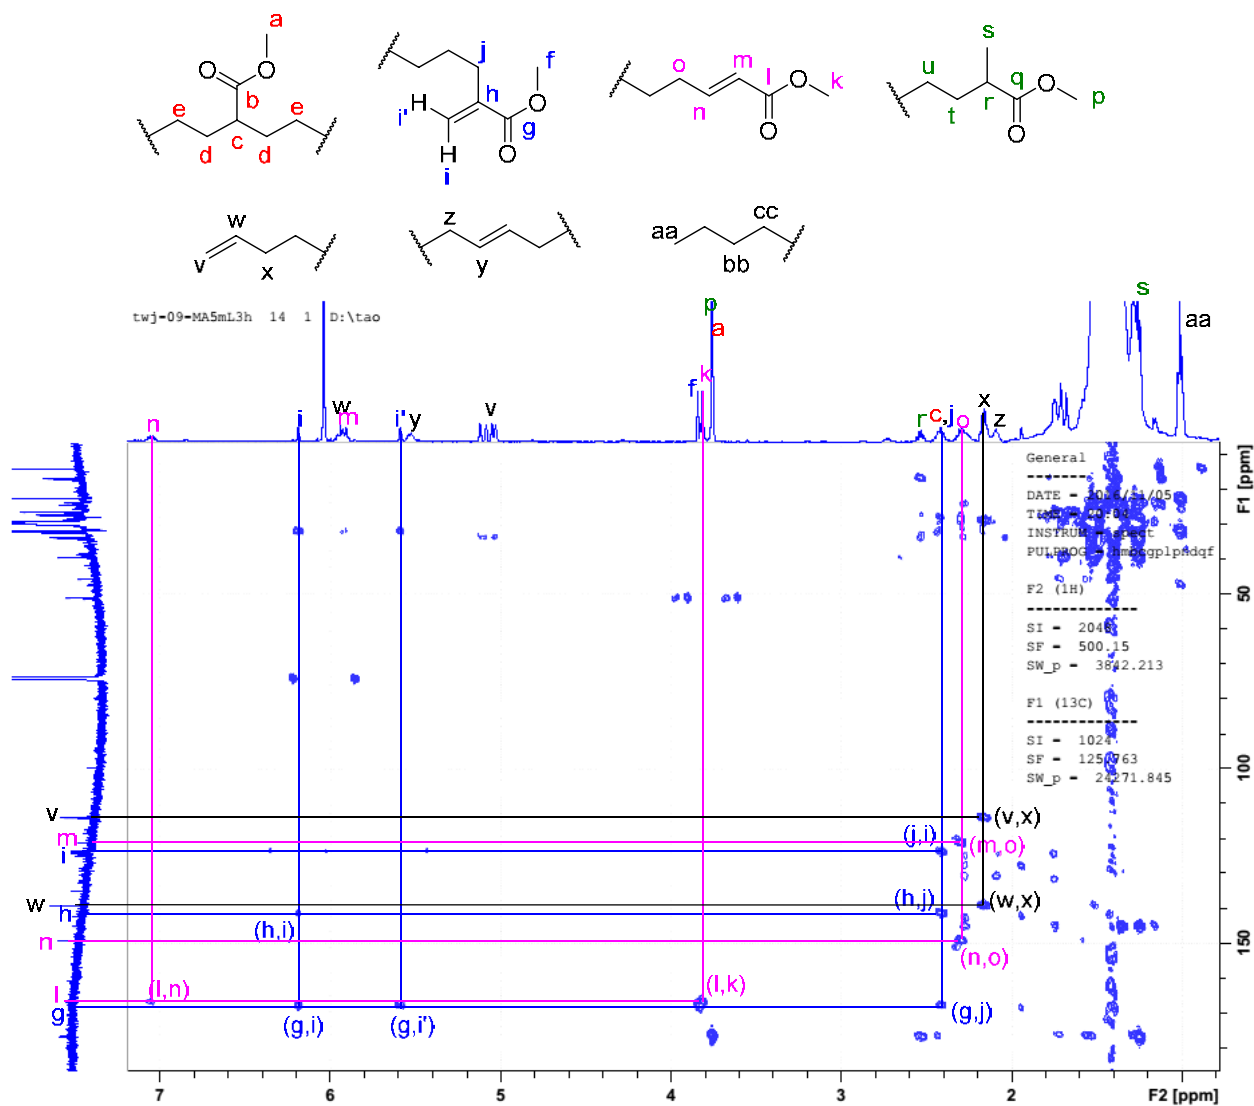

**Figure S85.** HMBC spectrum (1,1,2,2-tetrachloroethane- $d_2$ , 120 °C,  $\delta$  100–180 ppm) of ethylene/methyl acrylate copolymer obtained by **4b** at 30 °C (Table S2, entry 5).

**Table S4.**  $^1\text{H}$  and  $^{13}\text{C}$  NMR chemical shifts of the proposed structures and related model compounds *i*, *ii*, and *iii*.

| Proposed methyl acrylate incorporated structures                                  |                                  |                 |                                       |                 |                                        | Model compounds                                                                    |                                         |                 |                |                 |
|-----------------------------------------------------------------------------------|----------------------------------|-----------------|---------------------------------------|-----------------|----------------------------------------|------------------------------------------------------------------------------------|-----------------------------------------|-----------------|----------------|-----------------|
| 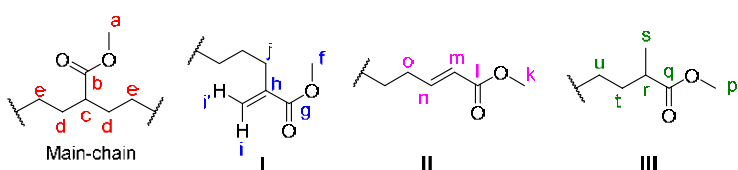 |                                  |                 |                                       |                 |                                        |  |                                         |                 |                |                 |
| label                                                                             | Reported structure <sup>11</sup> |                 | Model compound <i>i</i> <sup>15</sup> |                 | Model compound <i>ii</i> <sup>16</sup> |                                                                                    | Model compound <i>iii</i> <sup>17</sup> |                 | observed       |                 |
|                                                                                   | <sup>1</sup> H                   | <sup>13</sup> C | <sup>1</sup> H                        | <sup>13</sup> C | <sup>1</sup> H                         | <sup>13</sup> C                                                                    | <sup>1</sup> H                          | <sup>13</sup> C | <sup>1</sup> H | <sup>13</sup> C |
| a                                                                                 | ---                              | 50.6            |                                       |                 |                                        |                                                                                    |                                         |                 | 3.72           | 50.7            |
| b                                                                                 | ---                              | 176.0           |                                       |                 |                                        |                                                                                    |                                         |                 | ---            | 176.3           |
| c                                                                                 | ---                              | 45.3            |                                       |                 |                                        |                                                                                    |                                         |                 | 2.38           | 45.5            |
| d                                                                                 | ---                              | 32.0            |                                       |                 |                                        |                                                                                    |                                         |                 |                | 32.1            |
| e                                                                                 | ---                              | 27.1            |                                       |                 |                                        |                                                                                    |                                         |                 |                | 27.2            |
| f                                                                                 |                                  |                 | 3.75                                  | 51.8            |                                        |                                                                                    |                                         |                 | 3.81           | 51.2            |
| g                                                                                 |                                  |                 | ---                                   | 167.9           |                                        |                                                                                    |                                         |                 | ---            | 167.9           |
| h                                                                                 |                                  |                 |                                       | 136.5           |                                        |                                                                                    |                                         |                 | ---            | 140.7           |
| i'                                                                                |                                  |                 | 5.55                                  |                 |                                        |                                                                                    |                                         |                 | 5.55           |                 |
| i                                                                                 |                                  |                 | 6.10                                  | 125.4           |                                        |                                                                                    |                                         |                 | 6.15           | 123.5           |
| k                                                                                 |                                  |                 |                                       |                 | 3.67                                   | 51.3                                                                               |                                         |                 | 3.78           | 50.8            |
| l                                                                                 |                                  |                 |                                       |                 | ---                                    | 167.0                                                                              |                                         |                 | ---            | 166.9           |
| m                                                                                 |                                  |                 |                                       |                 | 5.76                                   | 122.6                                                                              |                                         |                 | 5.87           | 121.0           |
| n                                                                                 |                                  |                 |                                       |                 | 6.90                                   | 144.7                                                                              |                                         |                 | 7.02           | 149.0           |
| p                                                                                 |                                  |                 |                                       |                 |                                        |                                                                                    | 3.67                                    | 51.3            | 3.72           | 50.9            |
| q                                                                                 |                                  |                 |                                       |                 |                                        |                                                                                    | ---                                     | 177.2           | ---            | 176.6           |
| r                                                                                 |                                  |                 |                                       |                 |                                        |                                                                                    | 2.46                                    | 39.4            | 2.69           | 39.3            |
| s                                                                                 |                                  |                 |                                       |                 |                                        |                                                                                    | 1.14                                    | 17.1            | 1.13           | 16.6            |
| t                                                                                 |                                  |                 |                                       |                 |                                        |                                                                                    | 1.39                                    |                 | 1.53           |                 |
| t'                                                                                |                                  |                 |                                       |                 |                                        |                                                                                    | 1.64                                    | 36.2            | 1.77           | 33.6            |



### Main-chain incorporation structure:

All the typical signals of methoxycarbonyl group in the main chain are consistent with those in literature.<sup>エラ</sup>  
ー! ブックマークが定義されていません。 The integral ratio of signal **c** at 2.38 ppm should be  $(1.34 - 0.36 \times 2 = 0.62)$ . The integral of corresponding signal **a** at 3.72 ppm should be ca.  $(0.62 \times 3 = 1.86)$ .

### Structure I:

The existence of structure **I** with one remaining terminal 1,1-substituted double bond (signals **i**, **i'**, **f**, **g**, **h** and **j**, see Table S4 for the assignment) was confirmed by the correlations observed in <sup>1</sup>H–<sup>1</sup>H COSY and HMBC spectra (Figures S76–78, 84–85) and their chemical shifts. The integral ratio (0.36) of signal **i** at 6.151 ppm matches with that of signal **f** at 3.807 ppm (integral ratio: 1.07) and that of signal **i'** at 5.552 ppm (integral ratio: 0.36) (Figure S75).

### Structure II:

The existence of structure **II** with one remaining trans internal double bond (signals **m**, **n**, **k**, **l** and **o**, see Table S4 for the assignment) was confirmed by the correlations observed in <sup>1</sup>H–<sup>1</sup>H COSY and HMBC spectra (Figures S76–78, 84–85) and their chemical shifts. The integral ratio of signal **m** at 5.89 ppm (0.51) matches with that of signal **n** at 7.015 ppm (integral ratio: 0.52) and that of the signal **k** at 3.78 ppm (integral ratio: 1.54) (Figure S75).

### Structure III:

The existence of structure **III** (peaks **s**, **r**, **t**, **p** and **q**, see Table S4 for the assignment) was confirmed by the correlations observed in <sup>1</sup>H–<sup>1</sup>H COSY and HMBC spectra (Figures S76–78, 84–85) and their chemical shifts. The integral ratio of signal **r** at 2.49 ppm (0.82) matches with that of signal **p** at 3.72 ppm (integral ratio:  $4.56 - 1.86 = 2.70$ ) (Figure S75).

### The ratio of chain end/in-chain methyl acrylate

**Table S5.** Ratio of chain end methyl acrylate structures **I**, **II**, **III** and in-chain methyl acrylate structure in Table S2.

MA in-chain structure

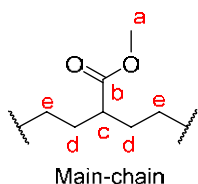

MA chain end structures

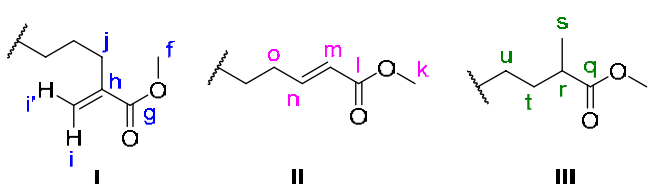

|         | MA chain end<br>structure I | MA chain end<br>structure II | MA chain end<br>structure III | MA in-chain<br>structure | MA chain ends / MA<br>in-chain |
|---------|-----------------------------|------------------------------|-------------------------------|--------------------------|--------------------------------|
| Entry 3 | 0.21                        | 0.43                         | 0.49                          | 0.38                     | $(0.21+0.43+0.49)/0.38=3.0$    |
| Entry 4 | 0.47                        | 0.53                         | 0.49                          | 0.60                     | $(0.47+0.53+0.49)/0.60=2.5$    |
| Entry 5 | 0.36                        | 0.51                         | 0.82                          | 0.62                     | $(0.36+0.51+0.82)/0.62=2.7$    |

### 5.2.3. Data of ethylene/allyl chloride copolymers

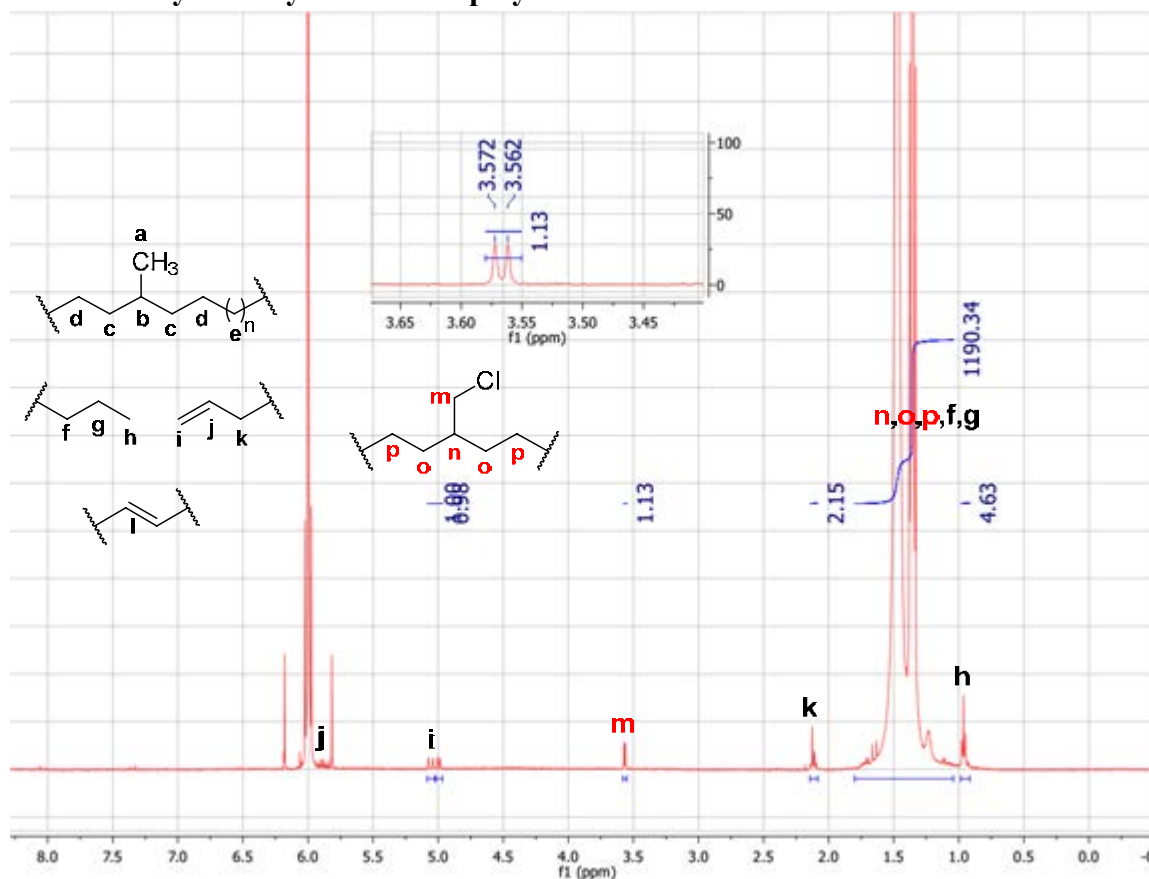

**Figure S86.**  $^1\text{H}$  NMR spectrum (500 MHz,  $1,1,2,2$ -tetrachloroethane- $d_2$ ,  $120^\circ\text{C}$ , relaxation delay 10 s) of ethylene/allyl chloride copolymer obtained by **4b** at  $30^\circ\text{C}$  (Table 2, entry 5).

Note: Calculation of Incorporation ratio of allyl chloride:

Assume  $(1-x)$  mol% ethylene and  $x$  mol% allyl chloride in the copolymer,

$$\frac{2x}{3x + 4(1-x)} = \frac{m}{e + f + g + h + i + j + k + n + o + p}$$

$$x = \frac{2m}{e + f + g + h + j + k + n + o + p + 0.5m}$$

In entry 5 of Table 2, the incorporation ratio of allyl acetate is calculated as follows:

$$(2 \times 1.13) / (1190.34 + 4.63 + 2.15 + 3.00 + 0.5 \times 1.13) = 0.19 \text{ mol\%}$$

タイトル:

&lt;表題部&gt;

サンプル名 : twj-09-93  
 データベース名 : 201602.mdb  
 保存データ名 : RSLT0939  
 マットデータ名 : 20160820  
 収集属性 : 独立  
 計算Ch : Ch 1

測定日時 : 2016/10/06 21:44:07  
 計算日時 : 2016/10/07 09:03:58  
 シリアル番号 : 939  
 カブ番号 :  
 収集時間[分] : 0.00 - 35.00  
 計算方法 : 分子量計算

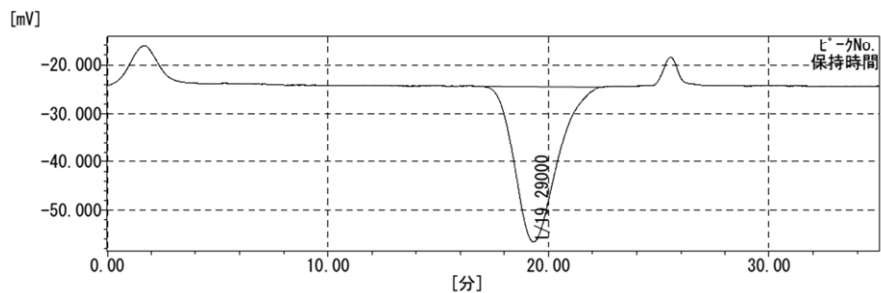

&lt;Ch1 分子量計算結果&gt;

| ピーク      | 1            | 2       | 3       | 4               |
|----------|--------------|---------|---------|-----------------|
| ピーク      | [分]          | [mV]    | [MOL]   |                 |
| ピークスタート  | 17.07        | -24.397 | 260,797 | Mn : 18,730     |
| ピークストップ  | 19.29        | -56.559 | 37,314  | Mw : 39,560     |
| ピークエント   | 22.41        | -24.514 | 891     | Mz : 63,106     |
|          |              |         |         | Mz+1 : 86,816   |
|          |              |         |         | Mv : 39,560     |
| 面積[mV・秒] | 3,976.560    |         |         | Mp : 38,172     |
| 面積比[%]   | 100.000      |         |         | Mz/Mw : 1.595   |
| 高さ[mV]   | 32.113       |         |         | Mw/Mn : 2.112   |
| [η]      | 39,559.95316 |         |         | Mz+1/Mw : 2.195 |

**Figure S87.** SEC chart of ethylene/allyl chloride copolymer obtained by **4b** (Table 2, entry 5).

$M_n$  (PS) = 19 kg/mol was corrected to  $M_n$  (PE) = 8.1 kg/mol by universal calibration.

モジュール: DSC  
 データ名: twj-09-93  
 測定日付: 2016/11/07  
 サンプル名: twj-09-93  
 サンプル質量: 3.759 mg  
 リファレンス名:  
 リファレンス質量: 0.000 mg

温度プログラム:  
 1\* Cel Cel Cel/min min s  
 2\* 200 -50 10 30 0.5  
 3\* -50 200 10 5 0.5  
 4\* 200 30 10 5 0.5

コメント:  
 オペレータ: tao

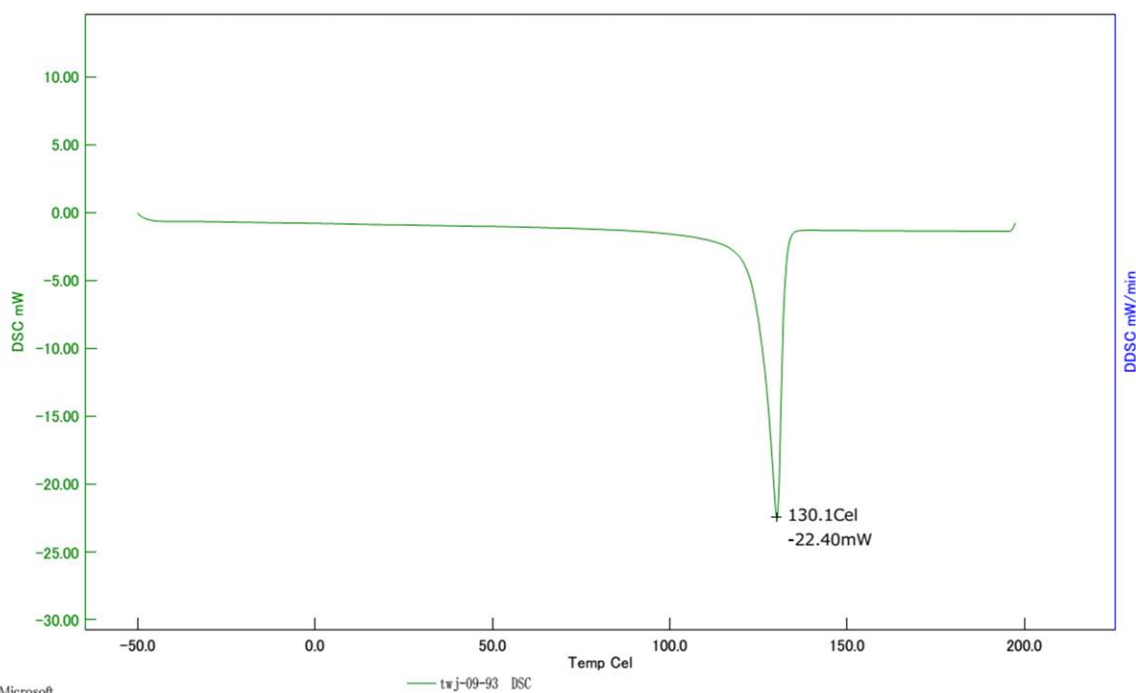

**Figure S88:** DSC traces of ethylene/allyl chloride copolymer obtained by **4b**. (Table 2, entry 5)

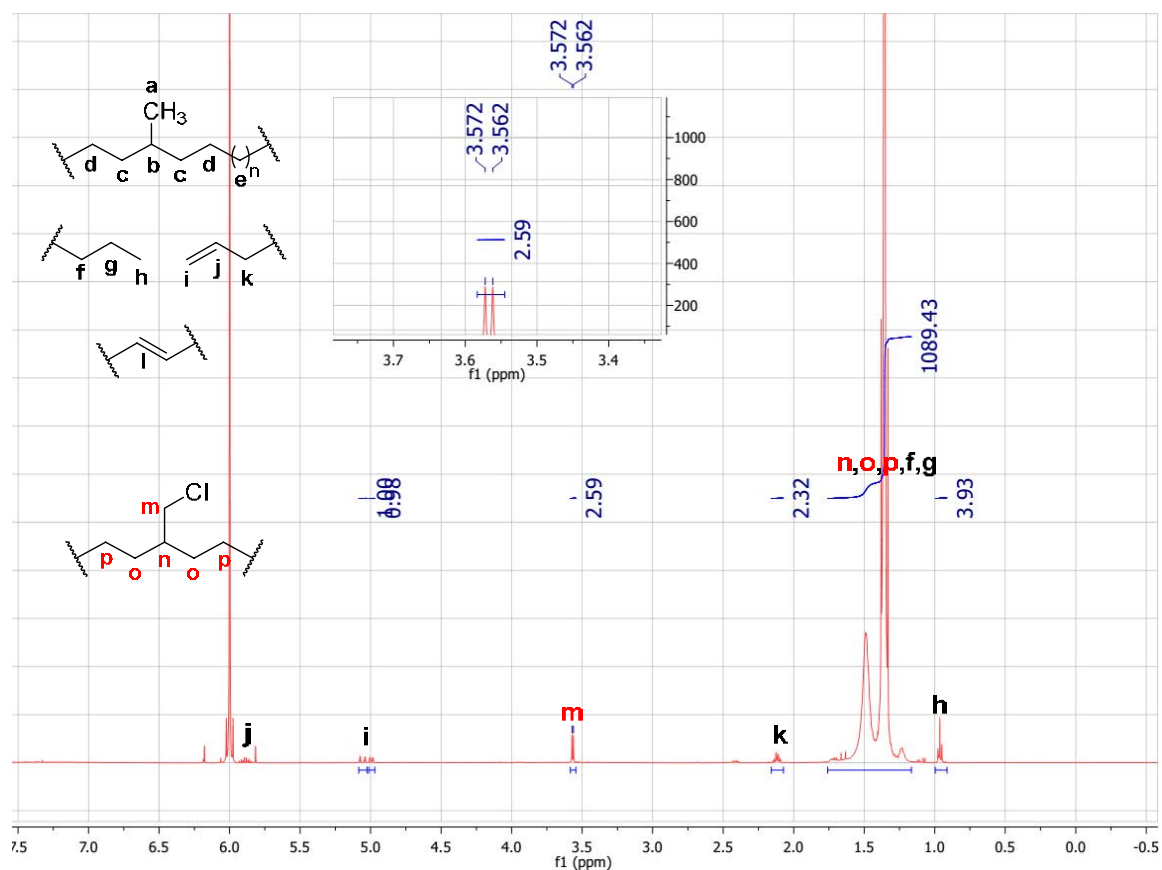

**Figure S89.**  $^1\text{H}$  NMR spectrum (500 MHz, 1,1,2,2-tetrachloroethane- $d_2$ , 120  $^\circ\text{C}$ , relaxation delay 10 s) of ethylene/allyl chloride copolymer obtained by **4b** at 30  $^\circ\text{C}$  (Table 2, entry 6).

Note: In entry 6, table 2, the incorporation ratio of allyl acetate is calculated as follows:

$$(2 \times 2.59) / (1089.43 + 3.93 + 2.32 + 3.00 + 0.5 \times 2.59) = 0.47 \text{ mol\%}$$

タイトル:

&lt;表題部&gt;

|         |              |         |                       |
|---------|--------------|---------|-----------------------|
| サンプル名   | : twj-09-94  | 測定日時    | : 2016/10/06 22:34:11 |
| データ名    | : 201602.mdb | 計算日時    | : 2016/10/07 09:04:55 |
| 保存データ名  | : RSLT0940   | シリアル番号  | : 940                 |
| ロットデータ名 | : 20160820   | カップ番号   | :                     |
| 収集属性    | : 独立         | 収集時間[分] | : 0.00 - 35.00        |
| 計算Ch    | : Ch 1       | 計算方法    | : 分子量計算               |

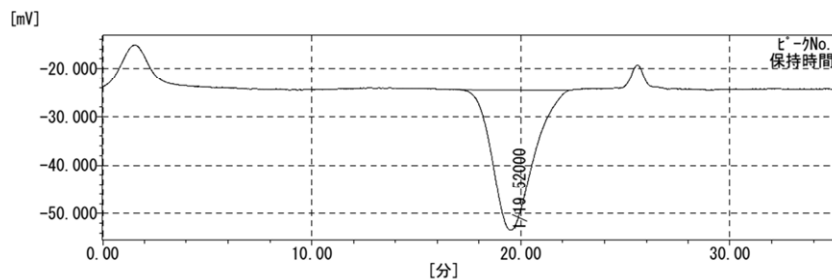

&lt;Ch1 分子量計算結果&gt;

| ピーク      | 1     | 2            | 3       | ピーク |
|----------|-------|--------------|---------|-----|
|          | [分]   | [mV]         | [MOL]   |     |
| ピークスタート  | 17.07 | -24.497      | 260,797 |     |
| ピークストップ  | 19.52 | -53.433      | 29,730  |     |
| ピークエント   | 22.37 | -24.544      | 949     |     |
| 面積[mV・秒] |       | 3,612.980    |         |     |
| 面積比[%]   |       | 100.000      |         |     |
| 高さ[mV]   |       | 28.914       |         |     |
| [η]      |       | 33,356.80500 |         |     |

|         |   |        |
|---------|---|--------|
| Mn      | : | 15,654 |
| Mw      | : | 33,357 |
| Mz      | : | 54,760 |
| Mz+1    | : | 77,305 |
| Mv      | : | 33,357 |
| Mp      | : | 31,880 |
| Mz/Mw   | : | 1.642  |
| Mw/Mn   | : | 2.131  |
| Mz+1/Mw | : | 2.318  |

**Figure S90.** SEC chart of ethylene/allyl chloride copolymer obtained by **4b** (Table 2, entry 6).

$M_n$  (PS) = 16 kg/mol was corrected to  $M_n$  (PE) = 6.8 kg/mol by universal calibration.

モジュール: DSC  
 データ名: twj-09-94  
 測定日付: 2016/11/08  
 サンプル名: twj-09-94  
 サンプル質量: 3.697 mg  
 リファレンス名:  
 リファレンス質量: 0.000 mg

温度プログラム:  

|    | Cell | Cell | Cell/min | min | s   |
|----|------|------|----------|-----|-----|
| 1* | 30   | 200  | 10       | 5   | 0.5 |
| 2* | 200  | -50  | 10       | 30  | 0.5 |
| 3* | -50  | 200  | 10       | 5   | 0.5 |
| 4* | 200  | 30   | 10       | 5   | 0.5 |

コメント:  
 オペレータ: tao

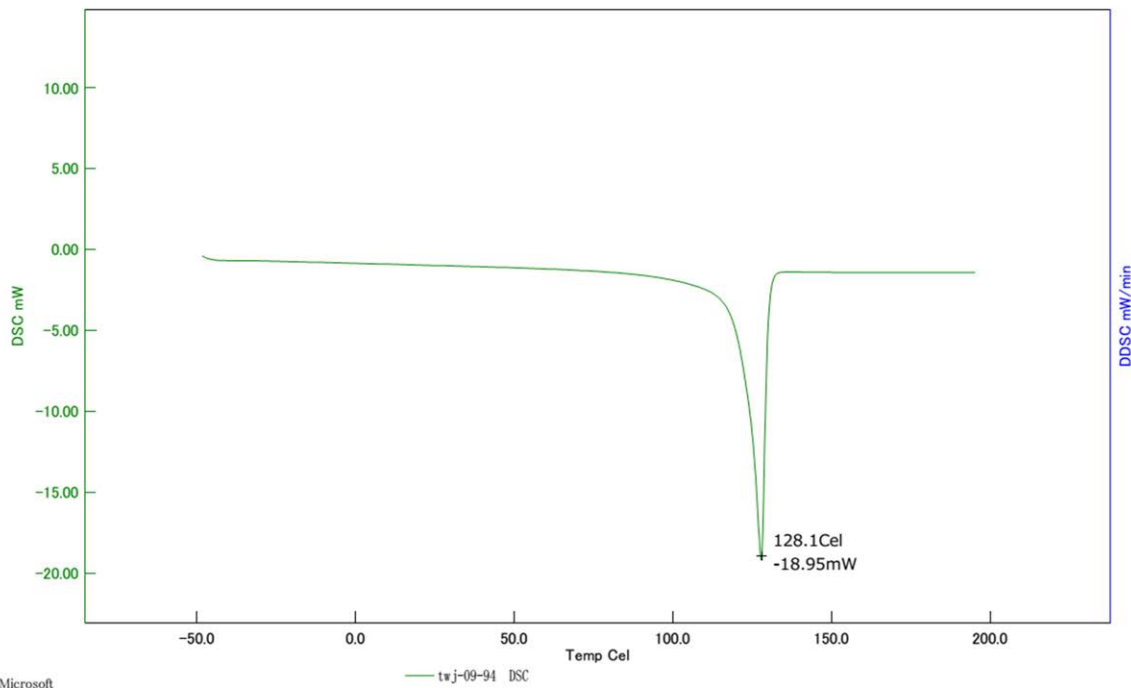

**Figure S91:** DSC traces of ethylene/allyl chloride copolymer obtained by **4b** (Table 2, entry 6).

## 5.2.4. Data of polyethylene obtained in attempted ethylene/vinyl acetate copolymerization

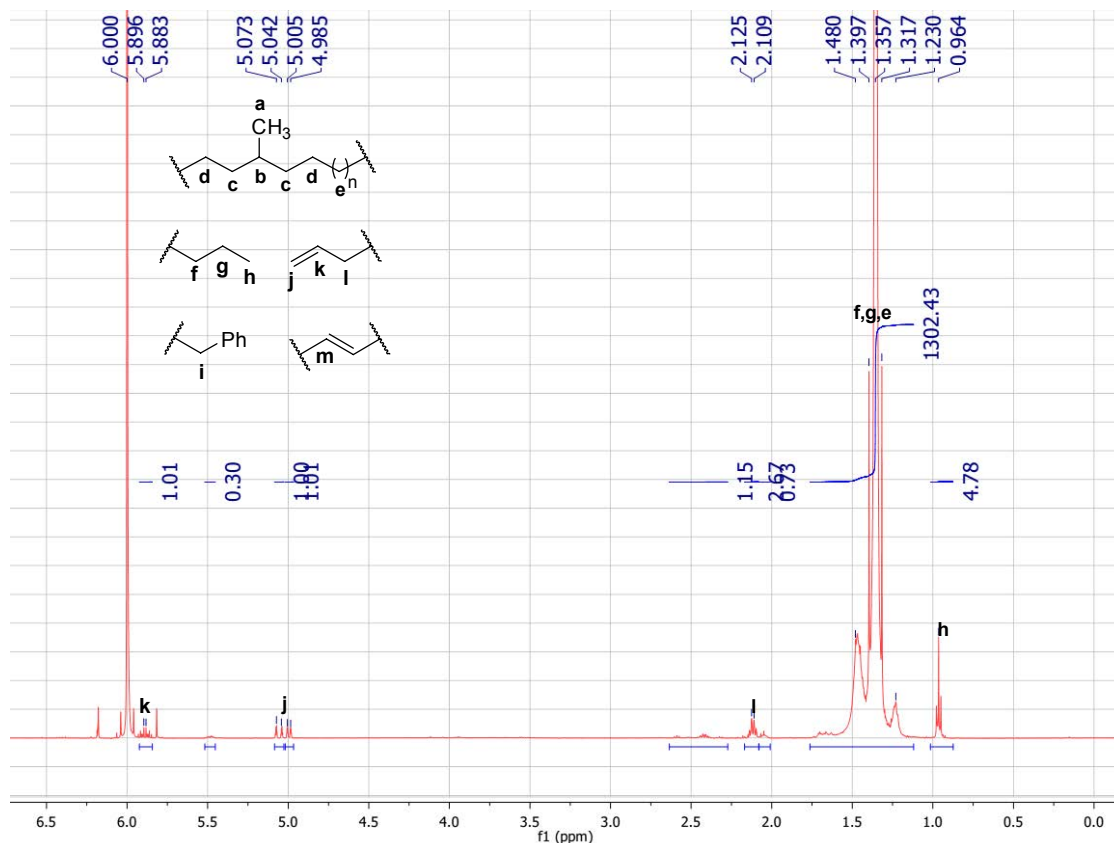

**Figure S92.**  $^1\text{H}$  NMR spectrum (500 MHz, 1,1,2,2-tetrachloroethane- $d_2$ , 120  $^\circ\text{C}$ , relaxation delay 10 s) of polyethylene obtained by **4b** in the presence of vinyl acetate at 30  $^\circ\text{C}$  (Table 2, entry 7).

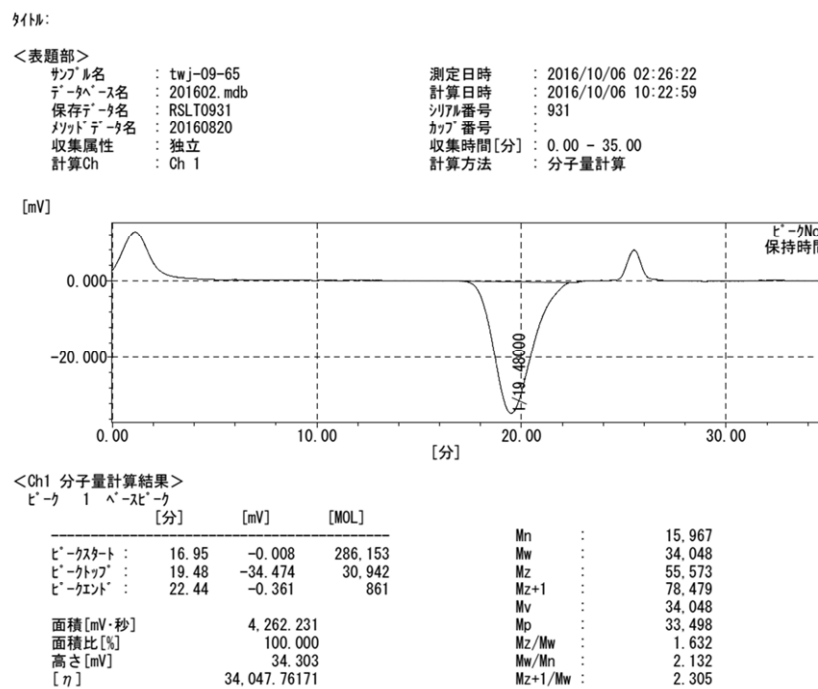

**Figure S93.** SEC chart of polyethylene obtained by **4b** (Table 2, entry 7).

$M_n$  (PS) = 16 kg/mol was corrected to  $M_n$  (PE) = 6.9 kg/mol by universal calibration.

モジュール: DSC  
 データ名: twj-09-65  
 測定日付: 2016/11/09  
 サンプル名: twj-09-65  
 サンプル質量: 2.483 mg  
 リファレンス名:  
 リファレンス質量: 0.000 mg

温度プログラム:  

|    | Cel | Cel | Cel/min | min | s   |
|----|-----|-----|---------|-----|-----|
| 1* | 30  | 200 | 10      | 5   | 0.5 |
| 2* | 200 | -50 | 10      | 30  | 0.5 |
| 3* | -50 | 200 | 10      | 5   | 0.5 |
| 4* | 200 | 30  | 10      | 5   | 0.5 |

コメント:  
 オペレータ: tao

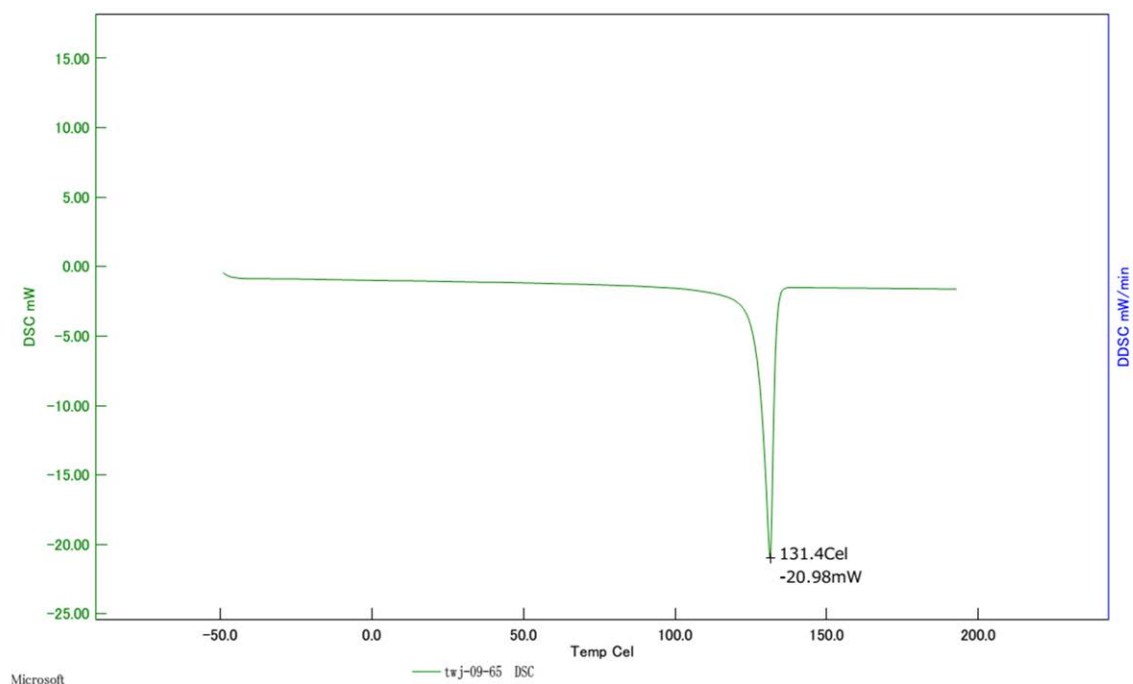

**Figure S94.** DSC traces of polyethylene obtained by **4b** (Table 2, entry 7).

## 6. Determination of The Mean Dihedral Angles

The mean dihedral angle was defined by the dihedral angle between the plane of NHC and the plane of metal's coordination square.<sup>11</sup> The plane of NHC was determined by principal component analysis (PCA) of the four atoms of the carbene atom, the two conjugating nitrogen atoms, and the metal center. The plane of metal's coordination square was determined by PCA of the five atoms of the metal center and the coordinating four atoms. The obtained 3rd eigenvectors were used as the normal vector of each plane. R (version 3.2.3) was used for the calculation.<sup>18</sup>

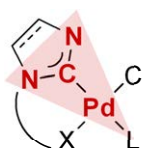

Plane of NHC

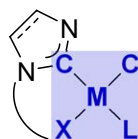

Plane of metal's coordination square

**Figure S95.** Selected atoms for the definition of *plane of NHC* and *plane of metal's coordination square*.

|                      |                        |                        |                        |                        |                      |
|----------------------|------------------------|------------------------|------------------------|------------------------|----------------------|
|                      |                        |                        |                        |                        |                      |
|                      | This work              | Albrecht <sup>19</sup> | Nozaki <sup>11</sup>   | Waymouth <sup>20</sup> |                      |
|                      |                        | 2012                   | 2015                   | 2005                   |                      |
| mean dihedral angle  | 32.5°                  | 1.50°                  | 5.24°                  | 26.1°                  | 22.3°                |
| activity of ethylene | <b>linear PE</b>       | oligomer               | oligomers              | <b>linear PE</b>       | <b>linear PE</b>     |
| polymerization       | <b>(TON &gt;10000)</b> |                        | (TON ~10)              | <b>(TON &gt;24600)</b> | <b>(TON ~1000)</b>   |
|                      |                        |                        |                        |                        |                      |
|                      | Nozaki <sup>21</sup>   | Grubbs <sup>22</sup>   | Albrecht <sup>19</sup> | Nozaki <sup>23</sup>   | Jordan <sup>24</sup> |
|                      | 2016                   | 2004                   | 2012                   | 2009                   | 2011                 |
| mean dihedral angle  | 33.1°                  | 39.0°                  | 44.2°                  | 48.3°*                 | 65.5°*               |
| activity of ethylene | <b>linear PE</b>       | no activity            | no activity            | trace                  | no activity          |
| polymerization       | <b>(TON &gt;4300)</b>  |                        |                        | oligomer               |                      |

\*average of the two molecules

**Figure S96.** Calculated mean dihedral angles between the NHC plane and the plane of metal's coordination square of various NHC-ligated metal complexes.



## Reference

- [1] Z. Guan, P. M. Cotts, E. F. McCord and S. J. McLain, *Science*, 1999, **283**, 2059–2062.
- [2] P. M. Cotts, Z. Guan, E. McCord and S. McLain, *Macromolecules*, 2000, **33**, 6945–6952.
- [3] J. C. Randall, C. J. Ruff, M. Kelchtermans and B. H. Gregory, *Macromolecules*, 1992, **25**, 2624–2633.
- [4] V. Grinshpun and A. Rudin, *Makrom. Chem., Rapid Commun.*, 1985, **6**, 219–223.
- [5] A. B. Pangborn, M. A. Giardello, R. H. Grubbs, R. K. Rosen and F. J. Timmers, *Organometallics*, 1996, **15**, 1518–1520.
- [6] G. Berthon-Gelloz, M. A. Siegler, A. L. Spek, B. Tinant, J. N. H. Reek and I. E. Marko, *Dalton Trans.*, 2010, **39**, 1444–1446.
- [7] R. E. Rulke, J. M. Ernsting, A. L. Spek, C. J. Elsevier, P. W. N. M. van Leeuwen and K. Vrieze, *Inorg. Chem.*, 1993, **32**, 5769–5778.
- [8] M. Brookhart, B. Grant and A. F. Volpe, *Organometallics*, 1992, **11**, 3920–3922.
- [9] A. Landa, A. Minkkilä, G. Bly and K. A. Jørgensen, *Chem. Eur. J.*, 2006, **12**, 3472–3483.
- [10] Y. Hoshimoto, T. Kinoshita, M. Ohashi and S. Ogoshi, *Angew. Chem. Int. Ed.*, 2015, **54**, 11666–11671.
- [11] R. Nakano and K. Nozaki, *J. Am. Chem. Soc.*, 2015, **137**, 10934–10937.
- [12] Y. Mitsushige, B. P. Carrow, S. Ito and K. Nozaki, *Chem. Sci.*, 2016, **7**, 737–744.
- [13] S. Ito, M. Kanazawa, K. Munakata, J.-i. Kuroda, Y. Okumura and K. Nozaki, *J. Am. Chem. Soc.*, 2011, **133**, 1232–1235.
- [14] E. Drent, R. van Dijk, R. van Ginkel, B. van Oort and R. I. Pugh, *Chem. Commun.*, 2002, 744–745.
- [15] The  $^1\text{H}$  NMR and  $^{13}\text{C}$  NMR spectrum can be found under  
[http://sdb.sdb.aist.go.jp/sdb/cgi-bin/direct\\_frame\\_top.cgi? sdbno=1425](http://sdb.sdb.aist.go.jp/sdb/cgi-bin/direct_frame_top.cgi? sdbno=1425), 2016
- [16] The  $^1\text{H}$  NMR and  $^{13}\text{C}$  NMR spectrums can be found under  
[http://sdb.sdb.aist.go.jp/sdb/cgi-bin/direct\\_frame\\_top.cgi? sdbno=2825](http://sdb.sdb.aist.go.jp/sdb/cgi-bin/direct_frame_top.cgi? sdbno=2825), 2016
- [17] The  $^1\text{H}$  NMR and  $^{13}\text{C}$  NMR spectrums can be found under  
[http://sdb.sdb.aist.go.jp/sdb/cgi-bin/direct\\_frame\\_top.cgi? sdbno=17075](http://sdb.sdb.aist.go.jp/sdb/cgi-bin/direct_frame_top.cgi? sdbno=17075), 2016
- [18] R Core Team (2015). R: A language and environment for statistical computing. R Foundation for Statistical Computing, Vienna, Austria. URL <https://www.R-project.org/>.
- [19] V. Khlebnikov, A. Meduri, H. Mueller-Bunz, T. Montini, P. Fornasiero, E. Zangrando, B. Milani and M. Albrecht, *Organometallics*, 2012, **31**, 976–986.
- [20] B. E. Ketz, X. G. Ottenwaelder, R. M. Waymouth, *Chem. Commun.*, 2005, **848**, 5693–5695.
- [21] W. Tao, R. Nakano, S. Ito, and K. Nozaki, *Angew. Chem. Int. Ed.*, 2016, **55**, 2835–2839.
- [22] A. W. Waltman, and R. H. Grubbs, *Organometallics*, 2004, **23**, 3105–3107.
- [23] Y. Nagai, T. Kochi, K. Nozaki, *Organometallics*, 2009, **28**, 6131–6134.
- [24] X. Zhou and R. F. Jordan, *Organometallics*, 2011, **30**, 4632–4642.
